# Supplementary material for: Quantitative analysis of cryptic splicing associated with TDP-43 depletion
Source: PubMed Central journal article supplement (PMC5446763; doi:10.1186/s12920-017-0274-1), 2017-05-26

## Figure S3

### Human Cryptic Exons from *Quantitative analysis of cryptic splicing associated with TDP-43 depletion*

Jack Humphrey, Warren Emmett, Pietro Fratta, Adrian M. Isaacs & Vincent Plagnol

September 16, 2016

Each cryptic exon discovered in either of the two human K562 datasets was visualised in both datasets using the IGV browser. For each dataset, the biological replicates were combined to create merged files for each condition. Read coverage and splice junctions are shown. The Ensembl transcripts for the hg38 build are provided, as are the coordinates of the cryptic exons discovered by CryptEx.

# 1 PHF12 E028i1

## Human K562 mRNA

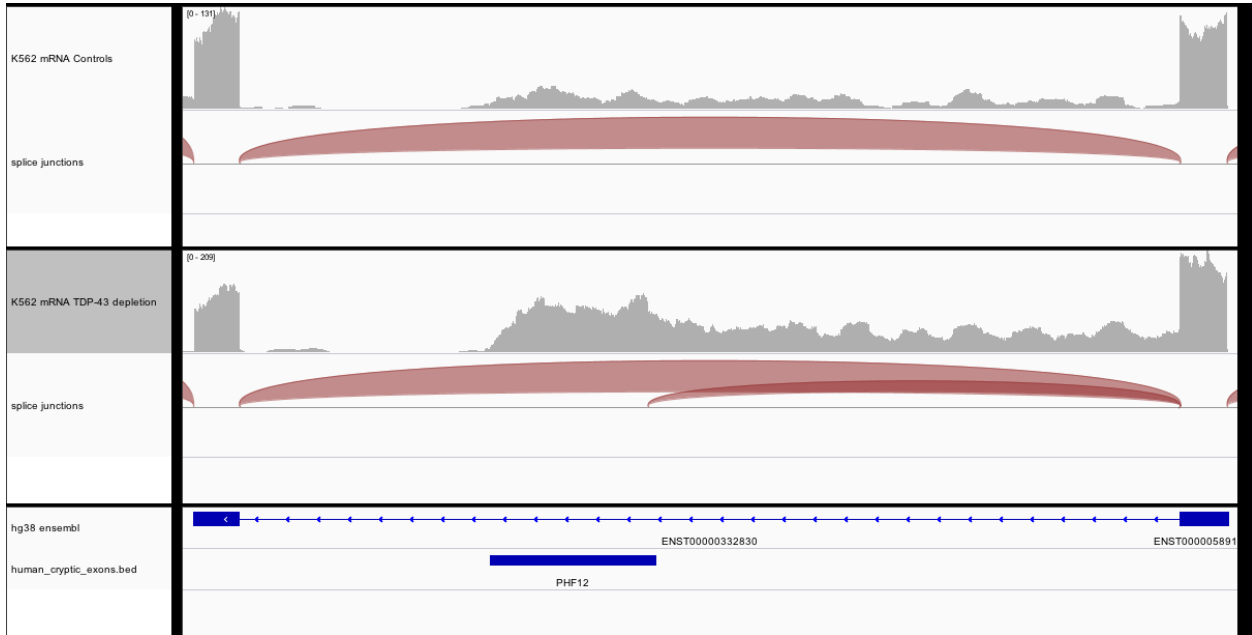

## Human K562 total RNA

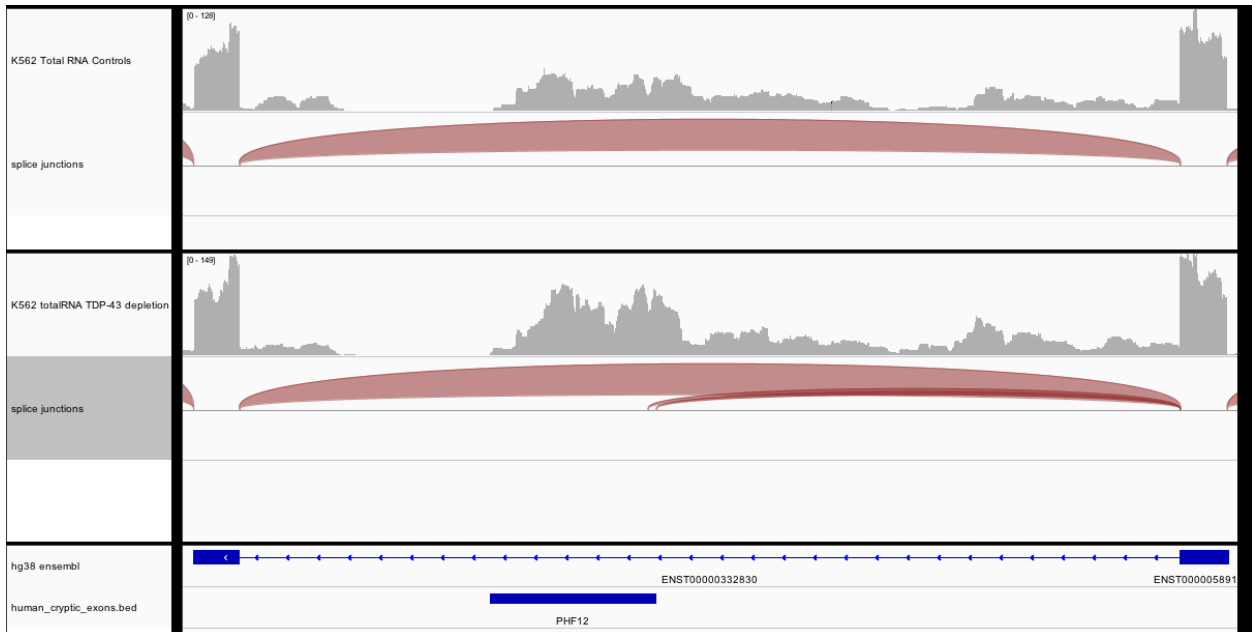

## 2 ZFPM2 E016i1

Human K562 mRNA

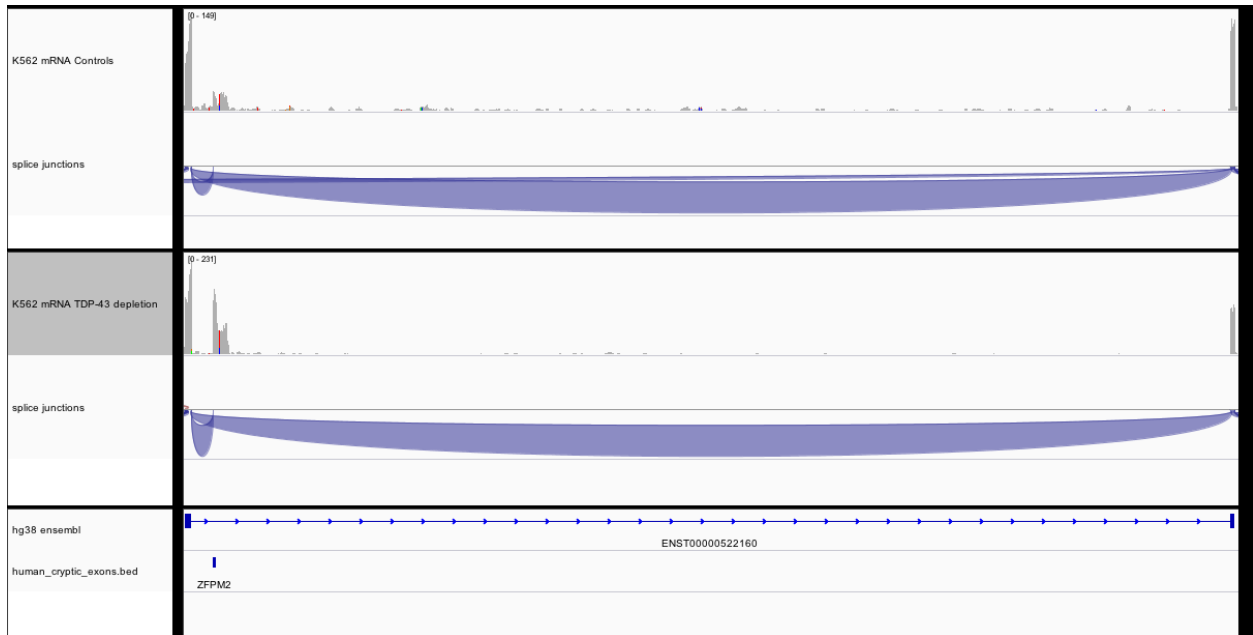

Human K562 total RNA

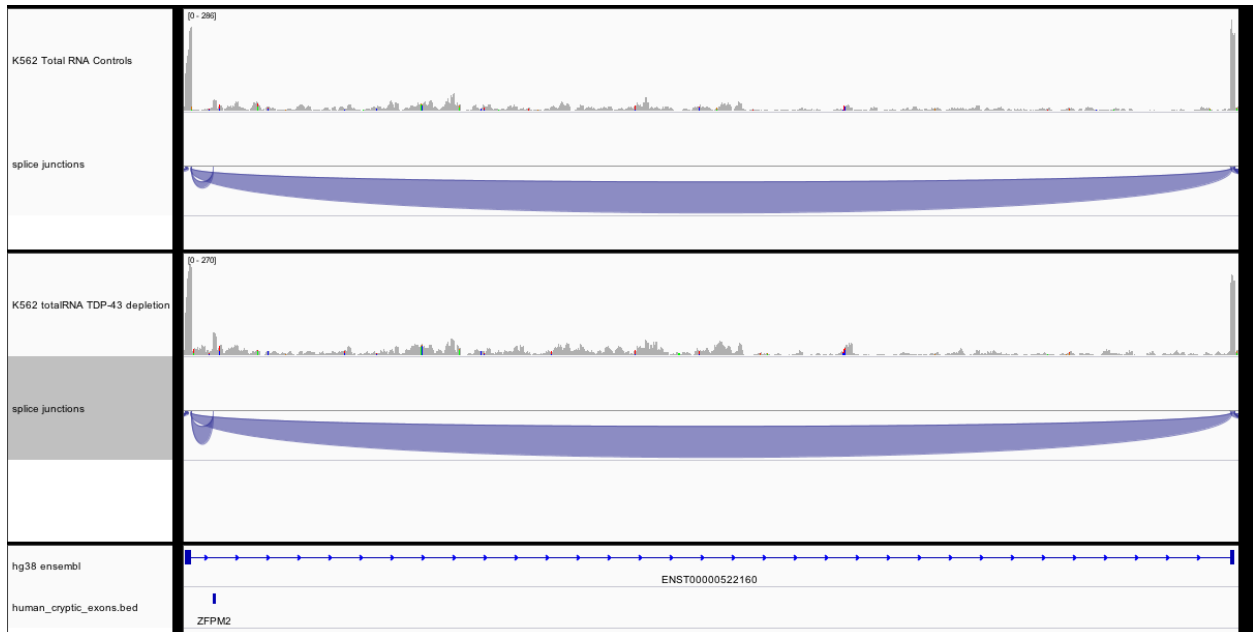

### 3 ACBD3 E004i1

Human K562 mRNA

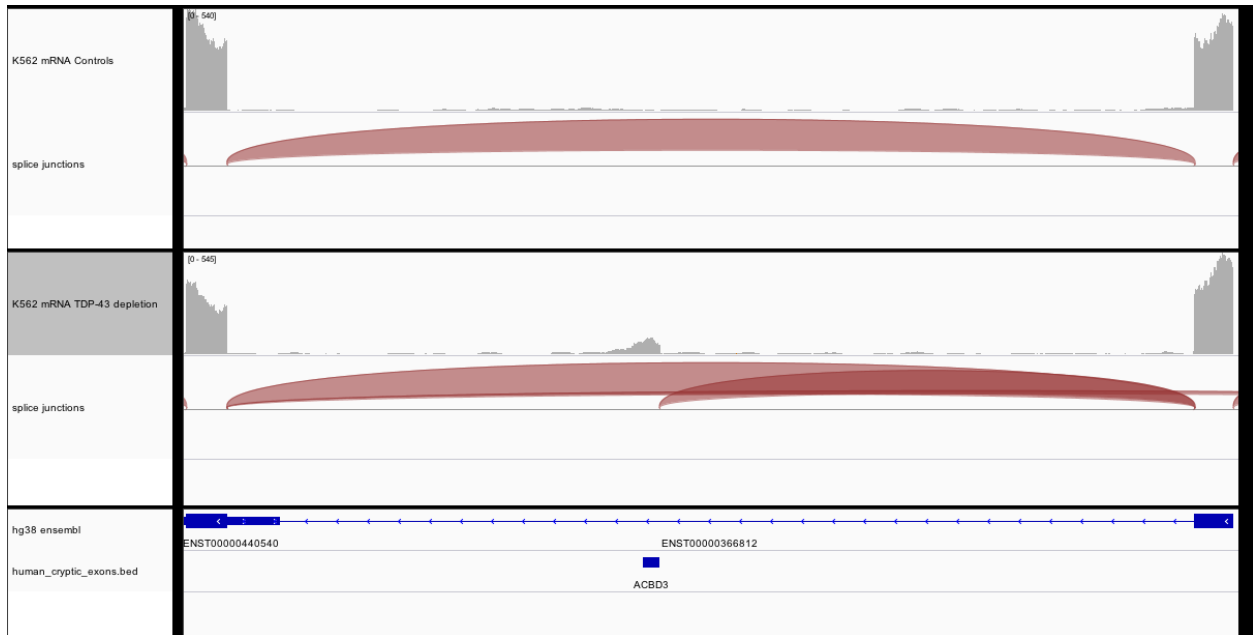

Human K562 total RNA

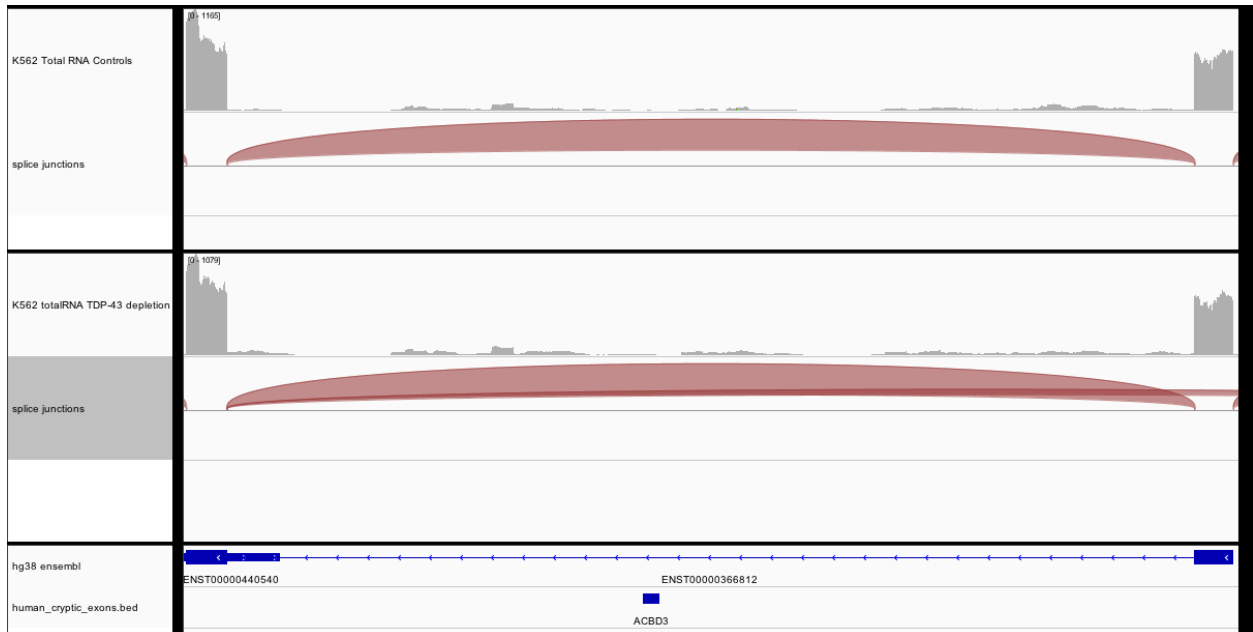

# 4 RPS6KA3 E031i2

## Human K562 mRNA

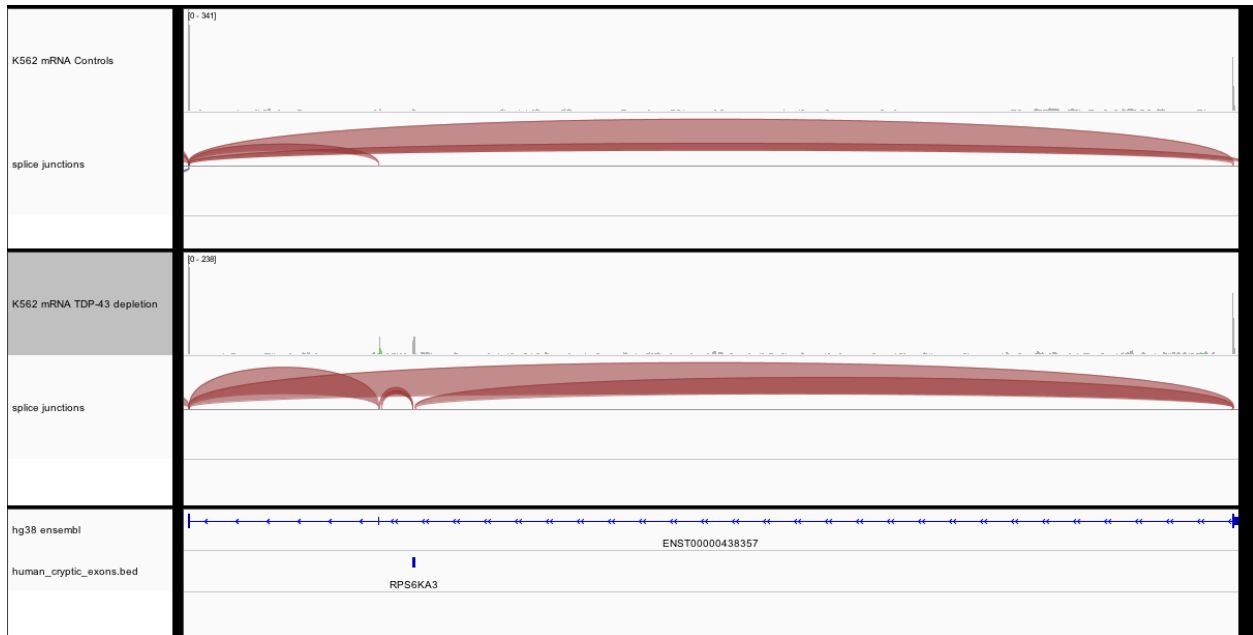

## Human K562 total RNA

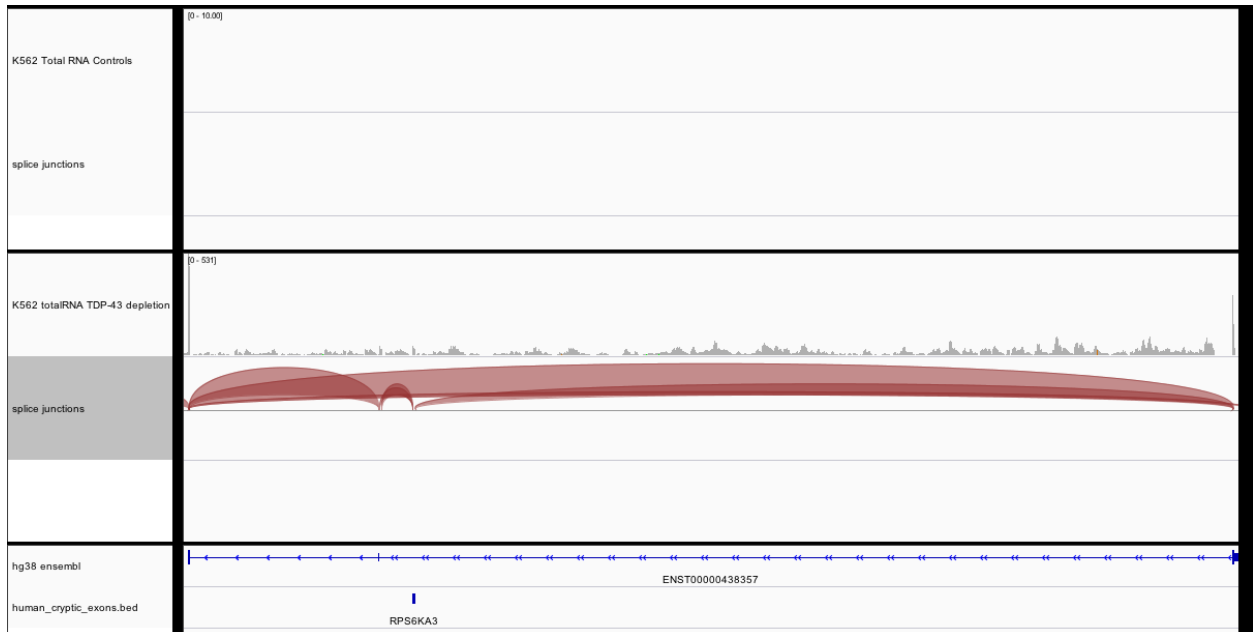

# 5 CPED1 E034i7

## Human K562 mRNA

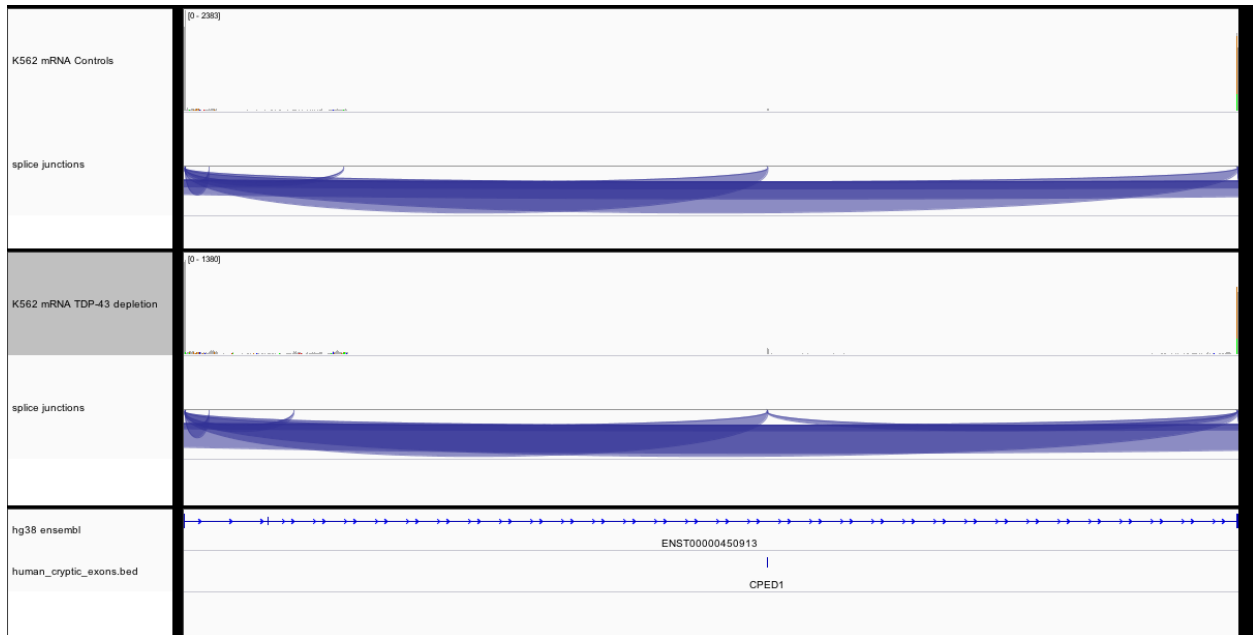

## Human K562 total RNA

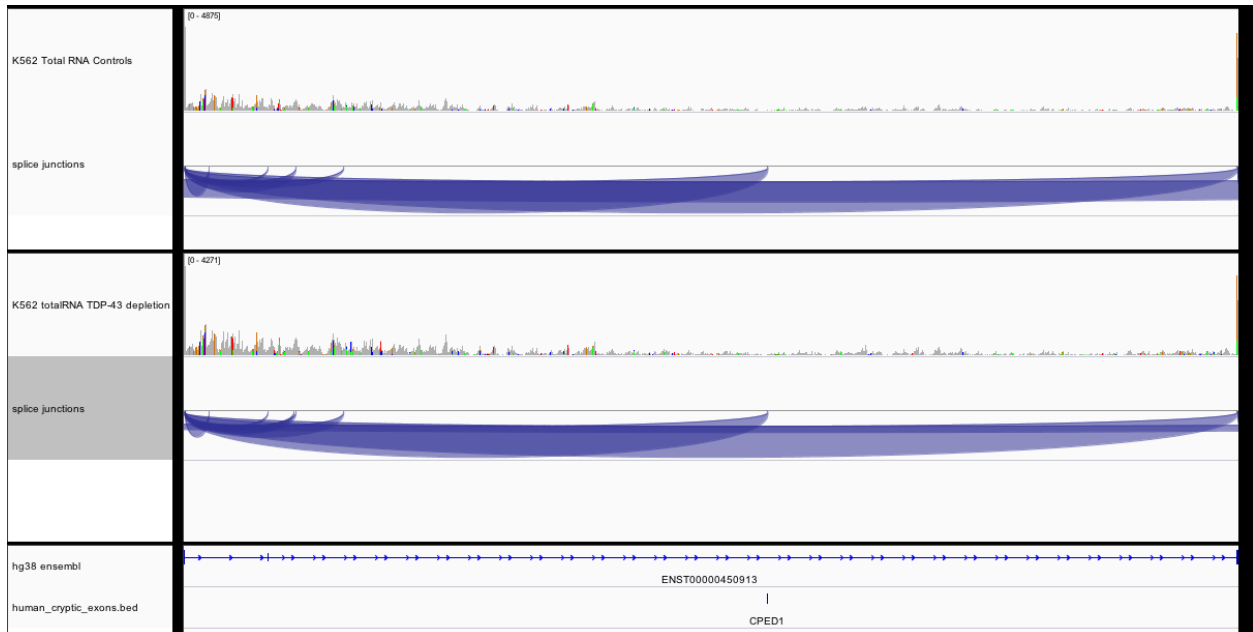

## 6 HUWE1 E033i1

Human K562 mRNA

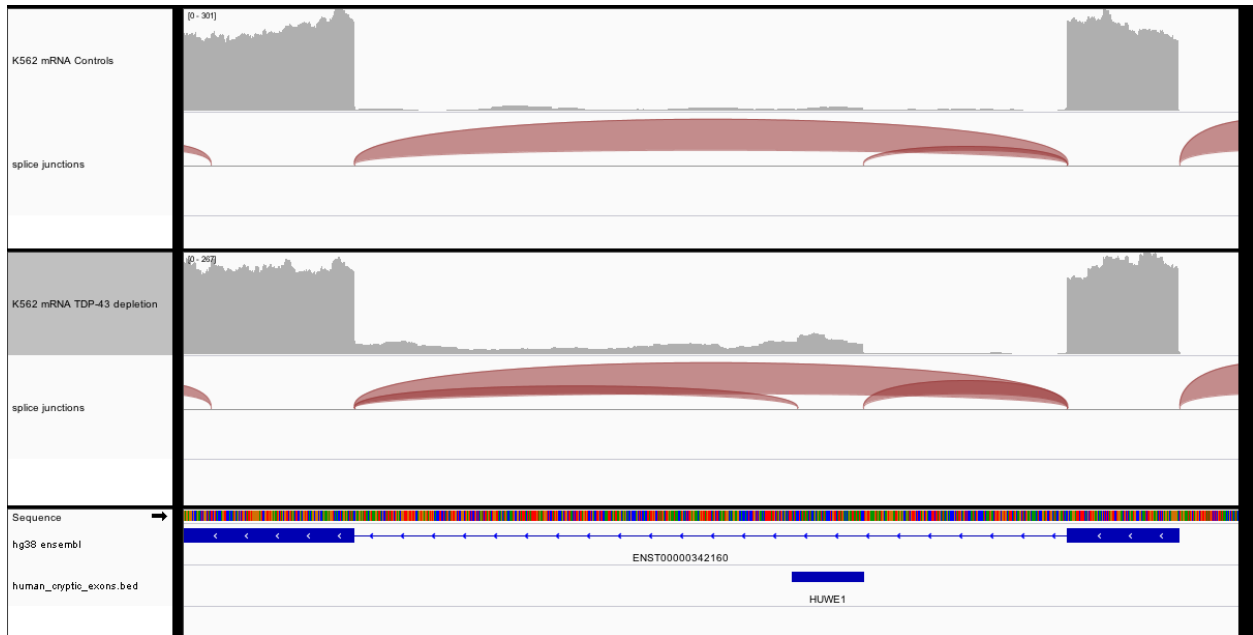

Human K562 total RNA

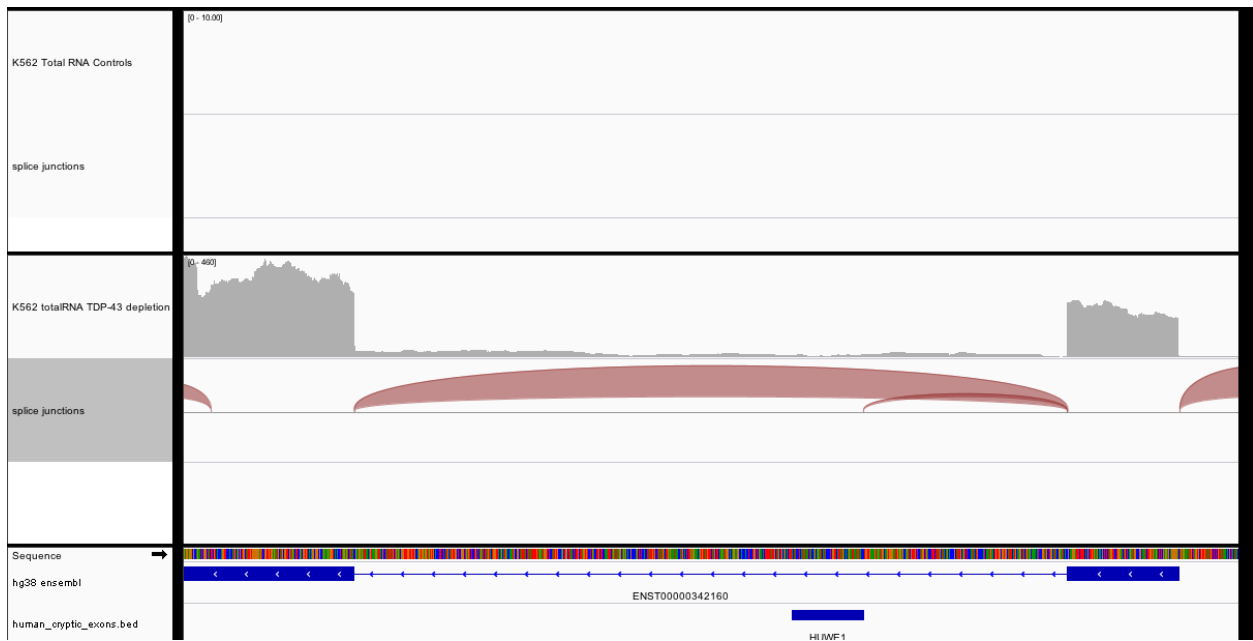

# 7 DYNC2LI1 E006i1

Human K562 mRNA

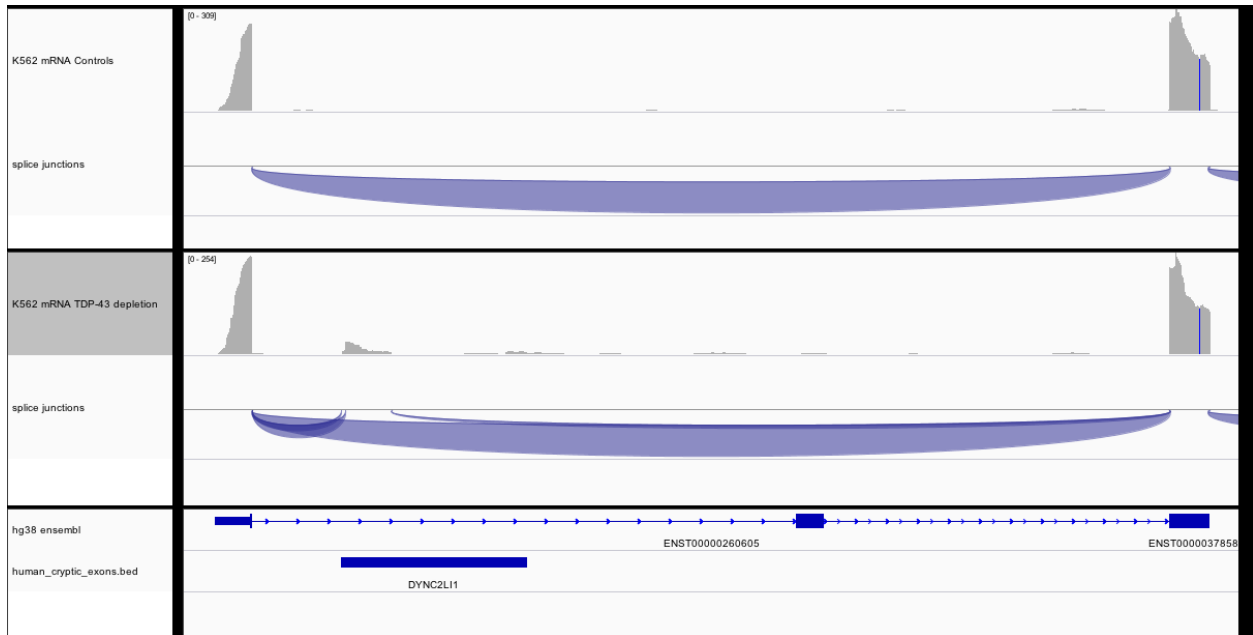

Human K562 total RNA

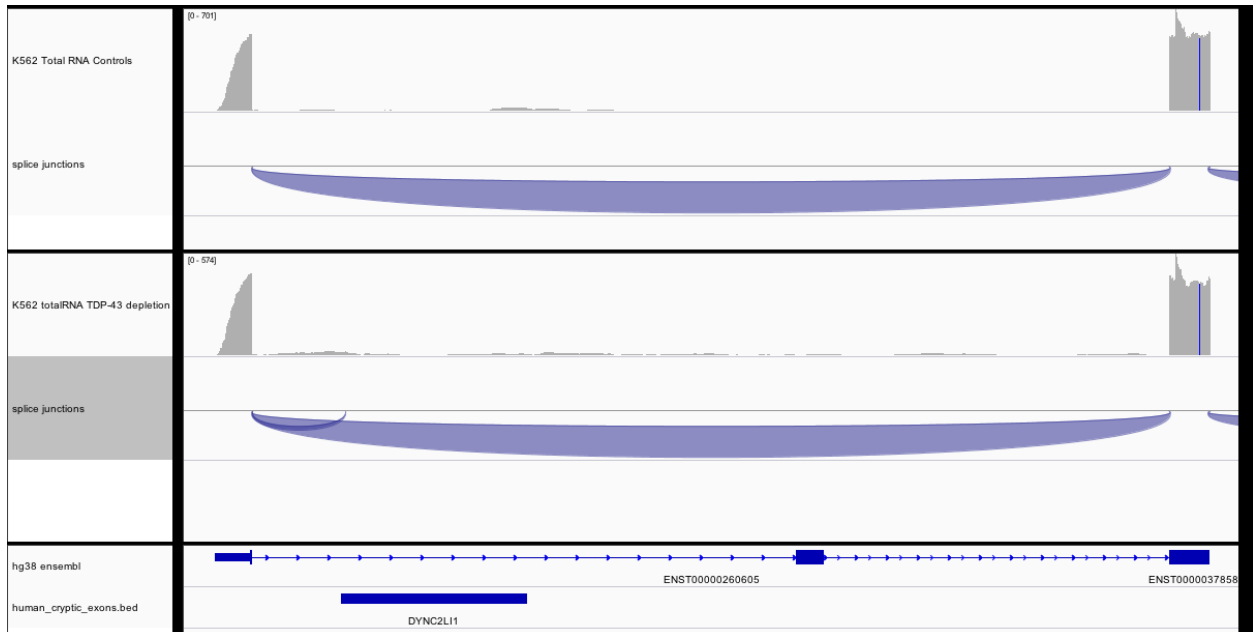



# 8 ZMYND8 E019i2

## Human K562 mRNA

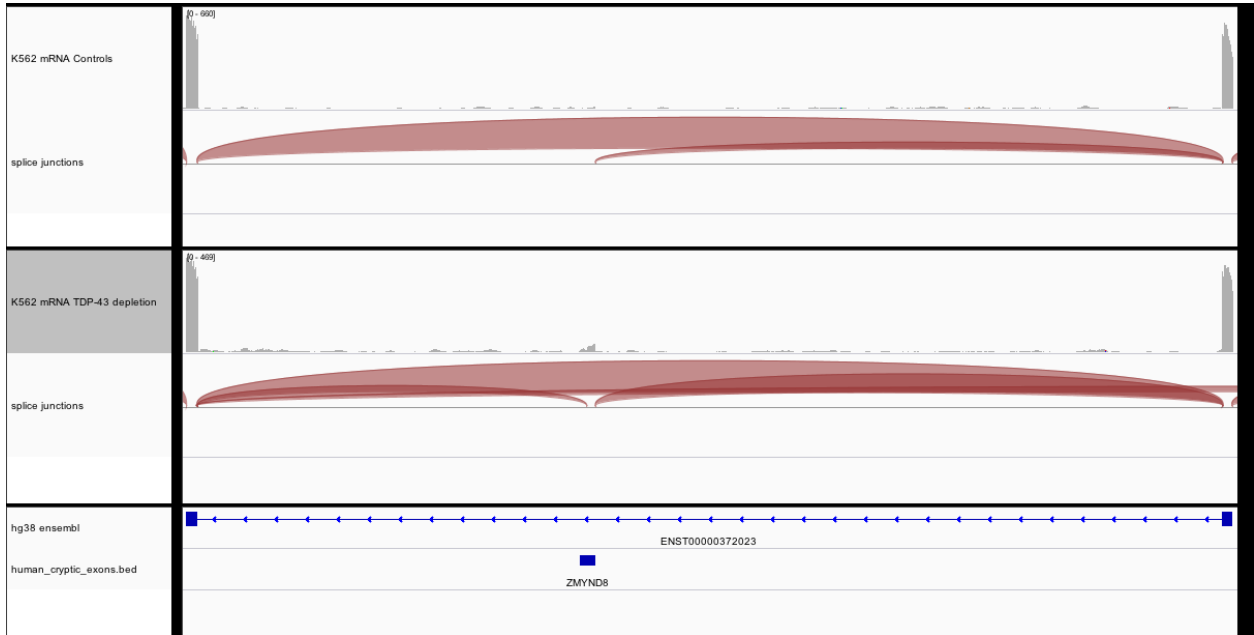

## Human K562 total RNA

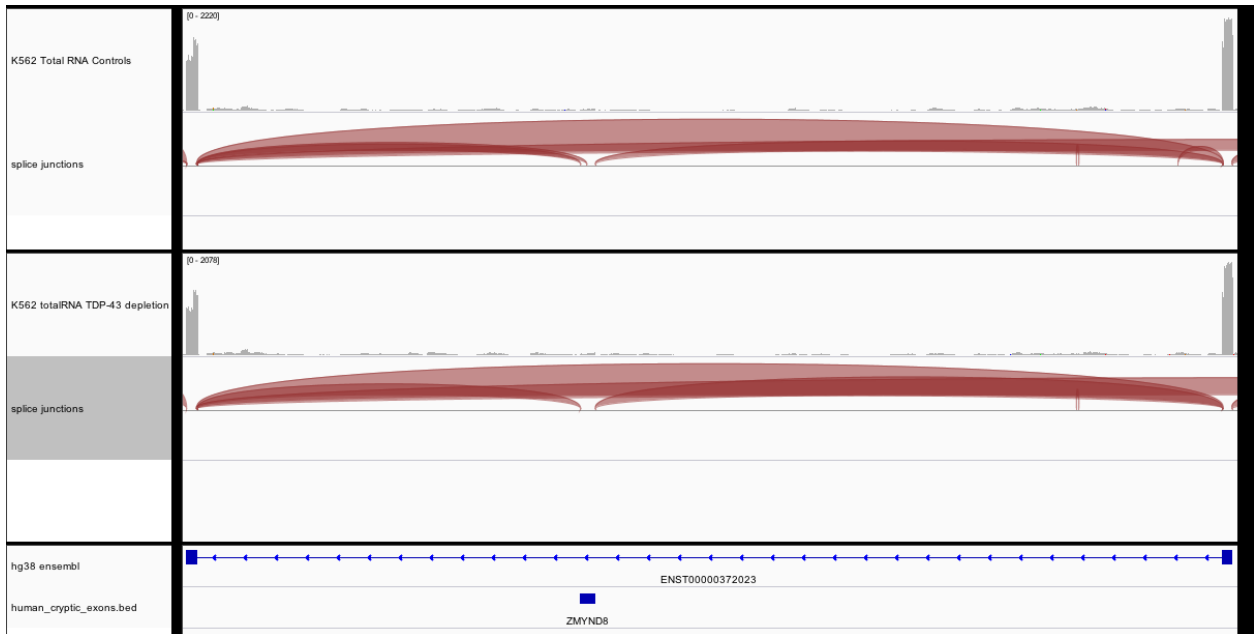

# 9 HEPH E030i1

## Human K562 mRNA

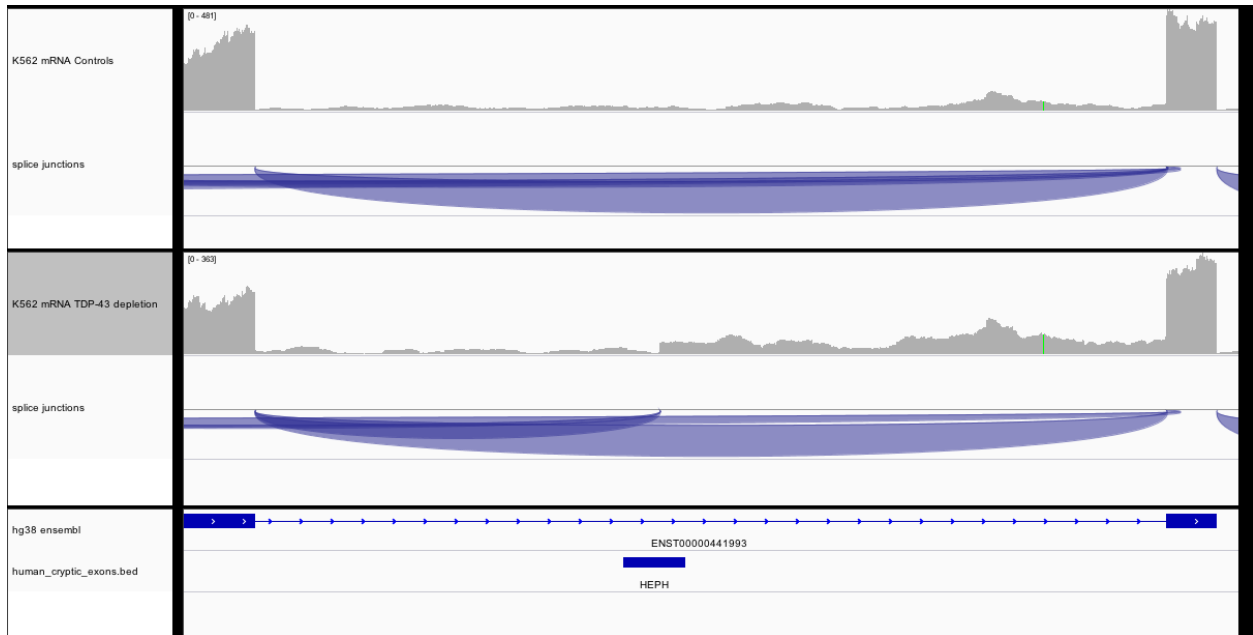

## Human K562 total RNA

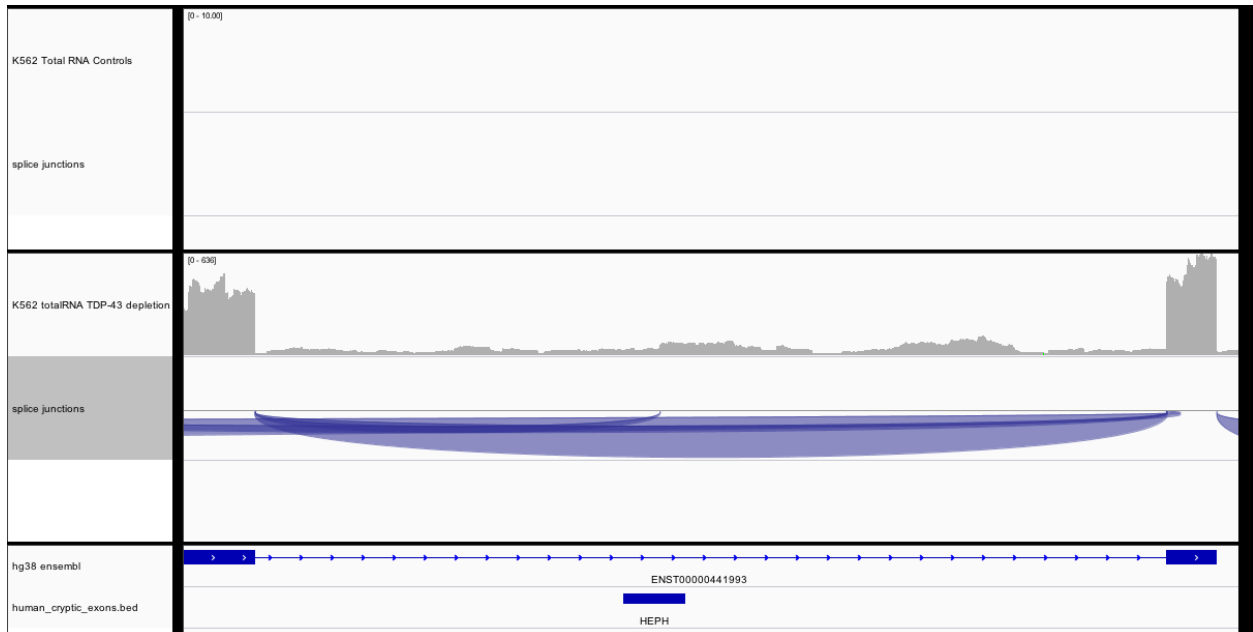

# 10 BTNL9 E031i1

## Human K562 mRNA

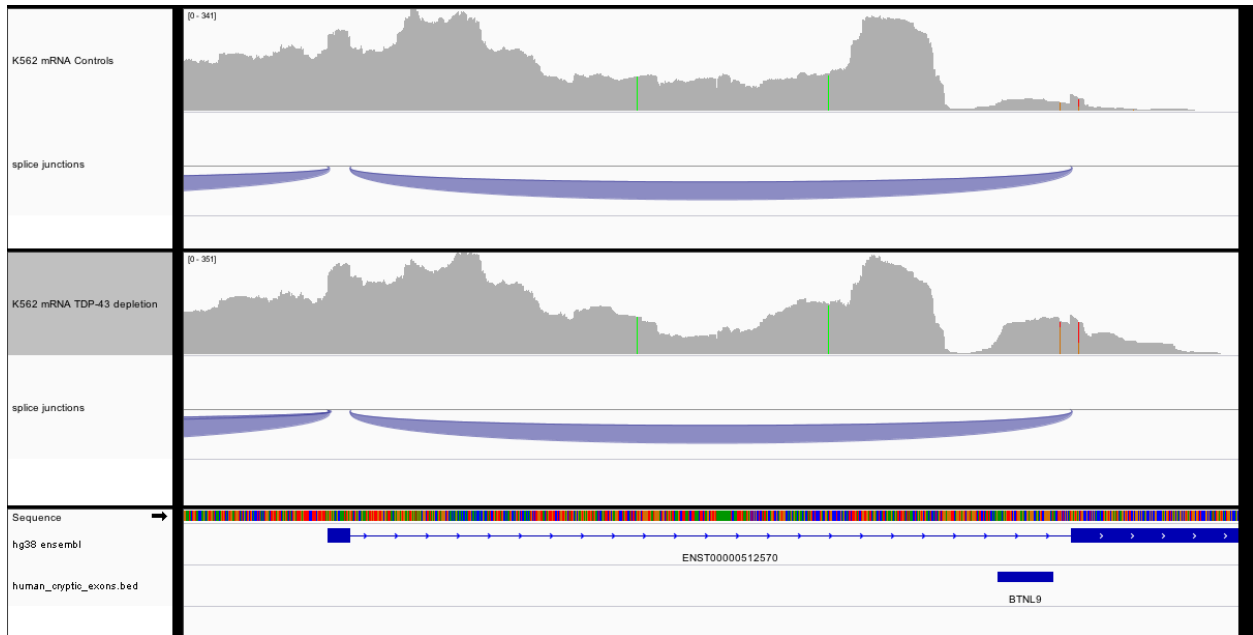

## Human K562 total RNA

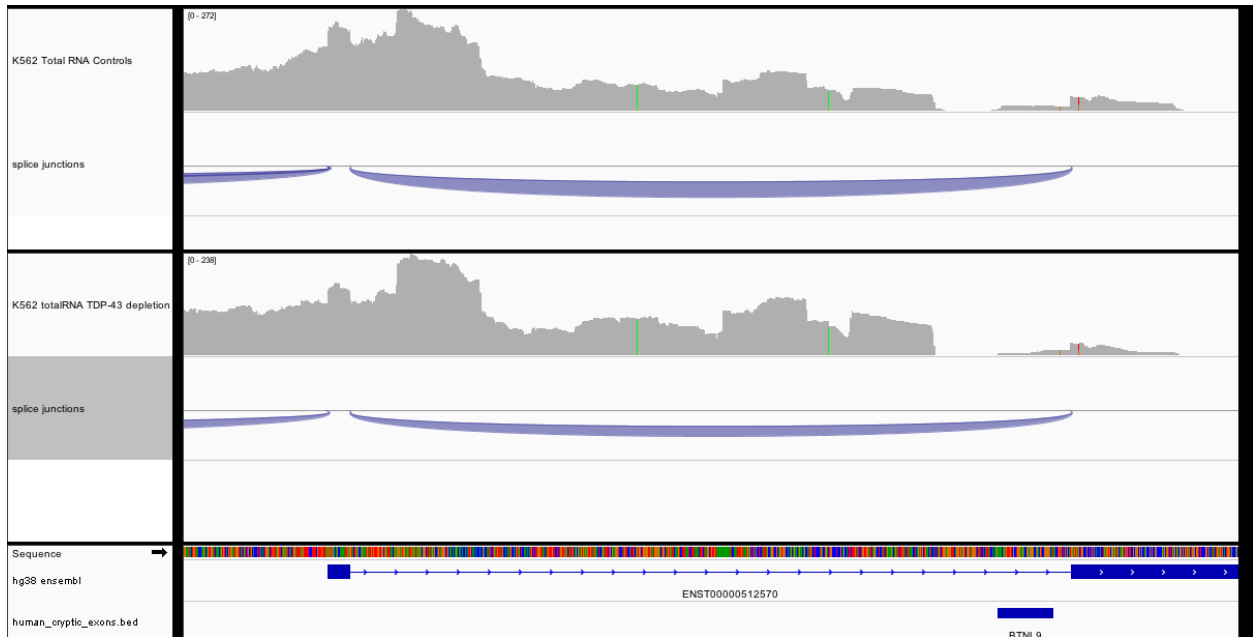

# 11 PAPSS1 E008i1

## Human K562 mRNA

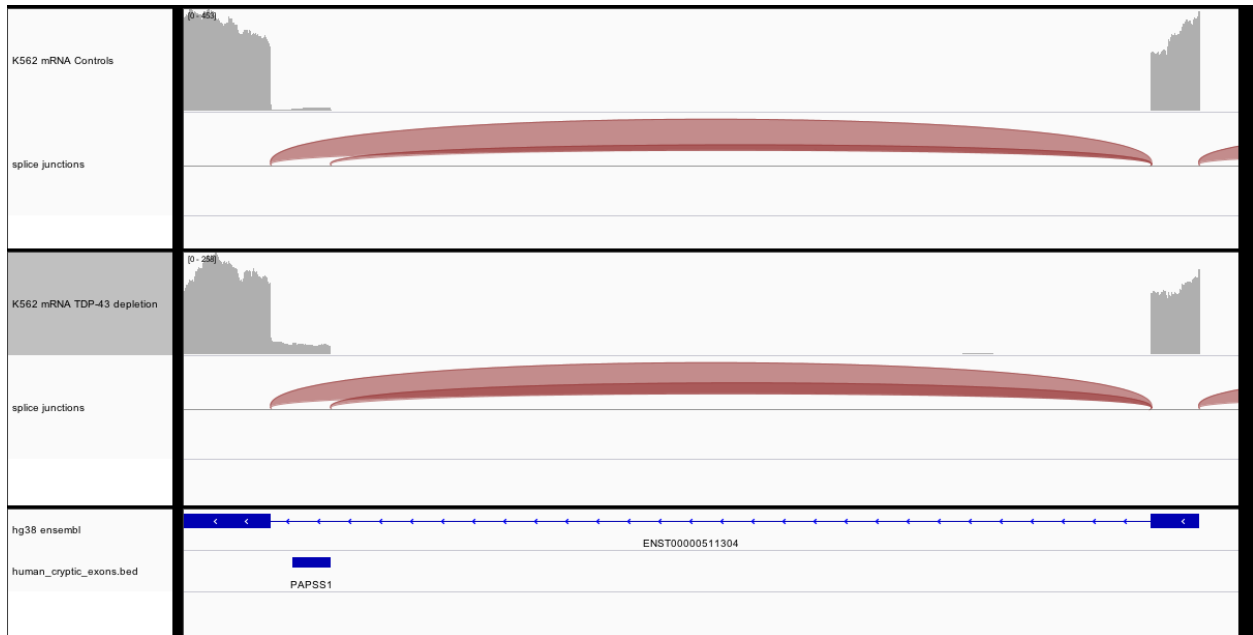

## Human K562 total RNA

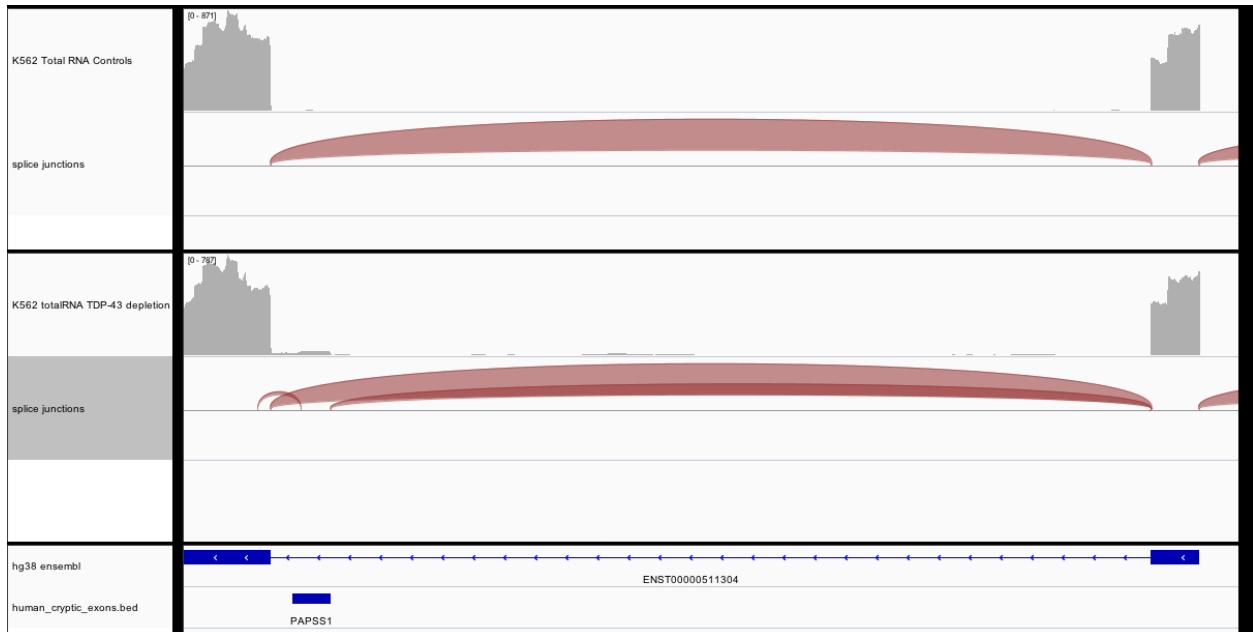

# 12 CLASP1 E049i1

Human K562 mRNA

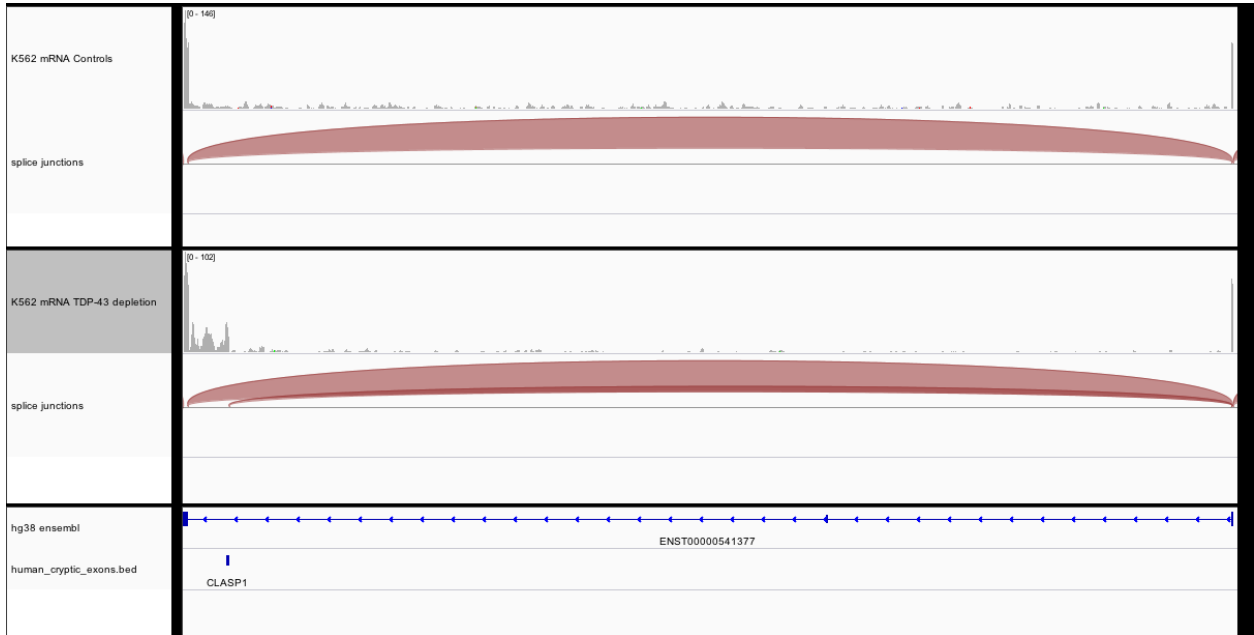

Human K562 total RNA

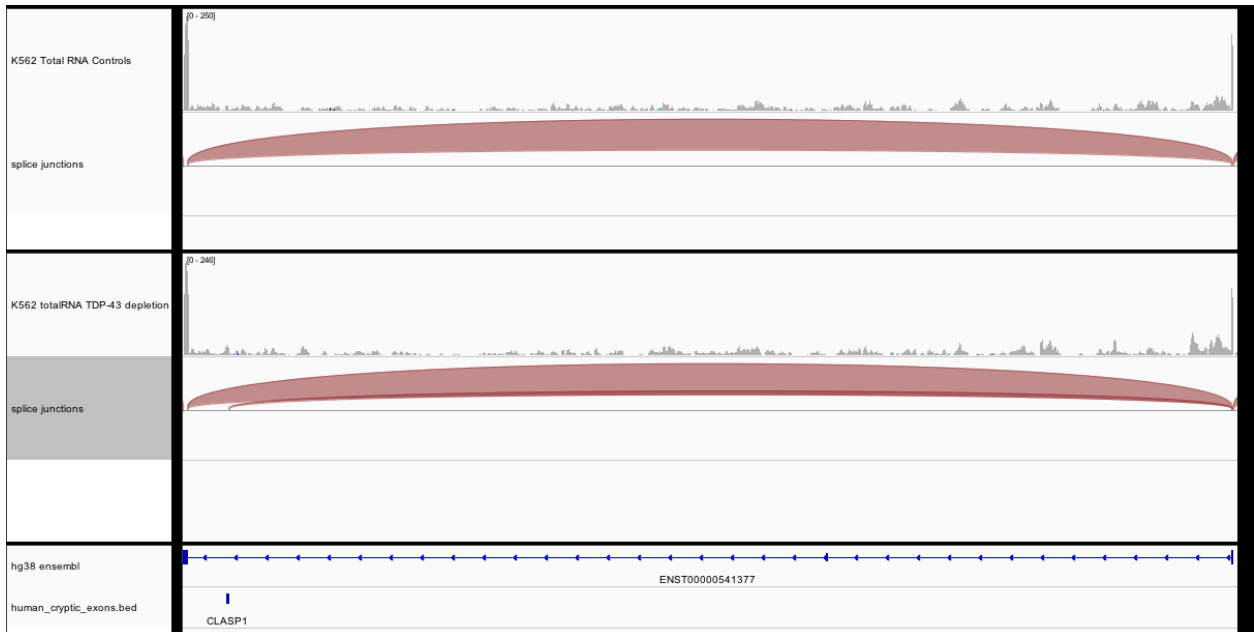

# 13 IST1 E053i1

## Human K562 mRNA

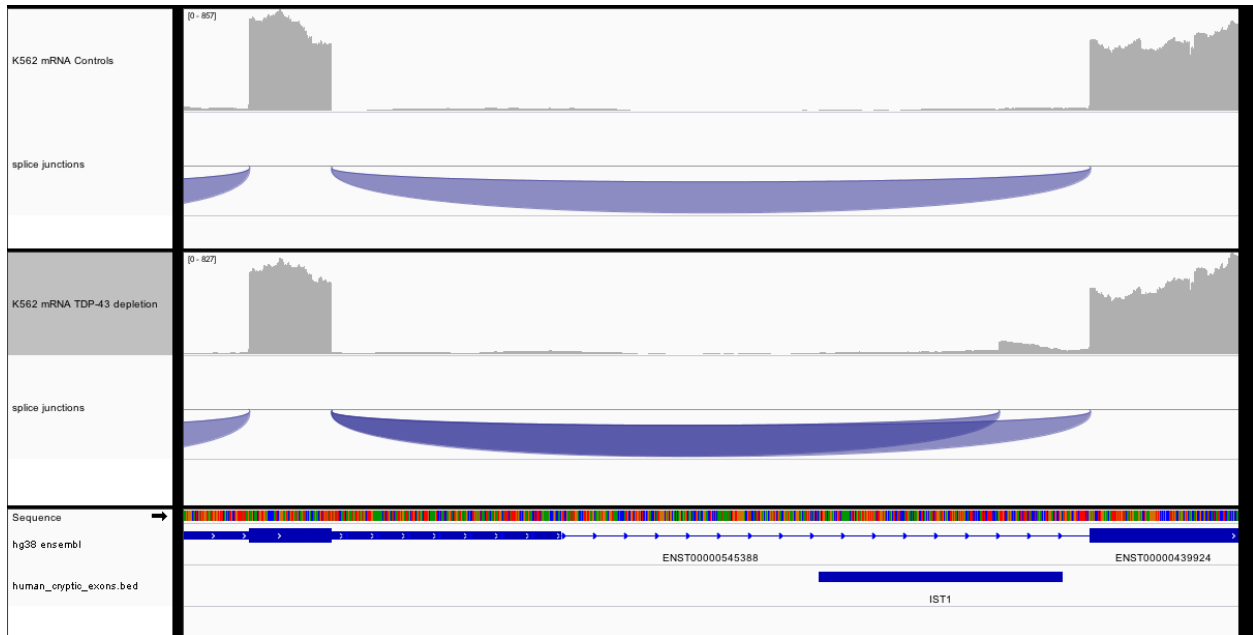

## Human K562 total RNA

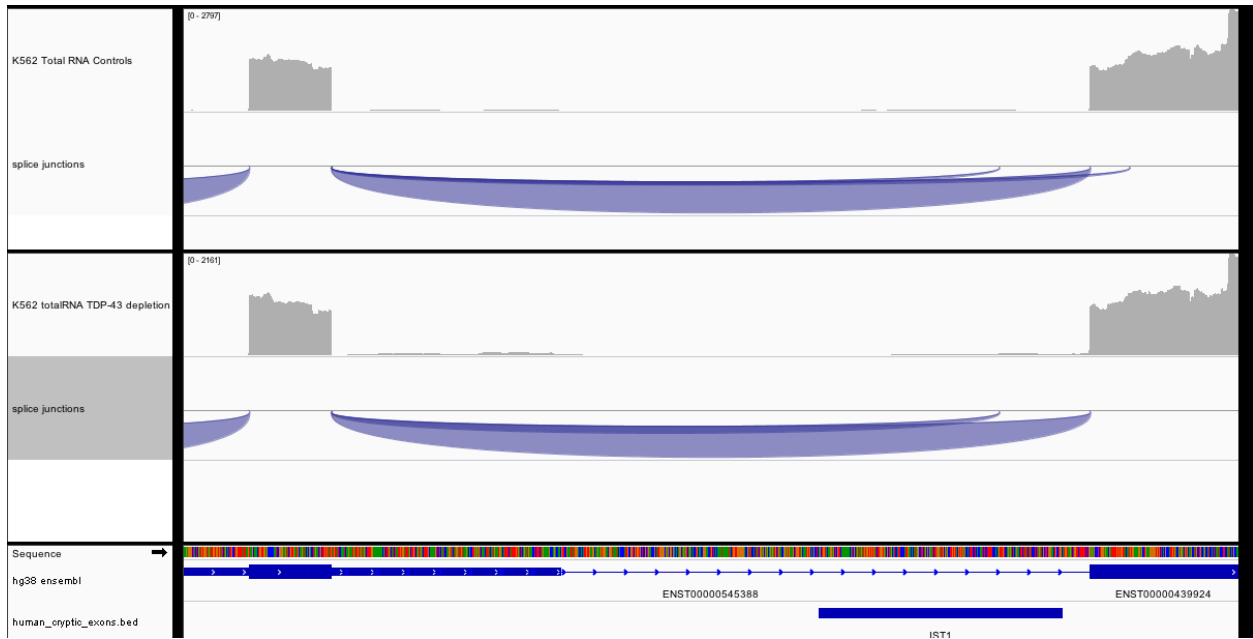

# 14 UBR4 E084i1

## Human K562 mRNA

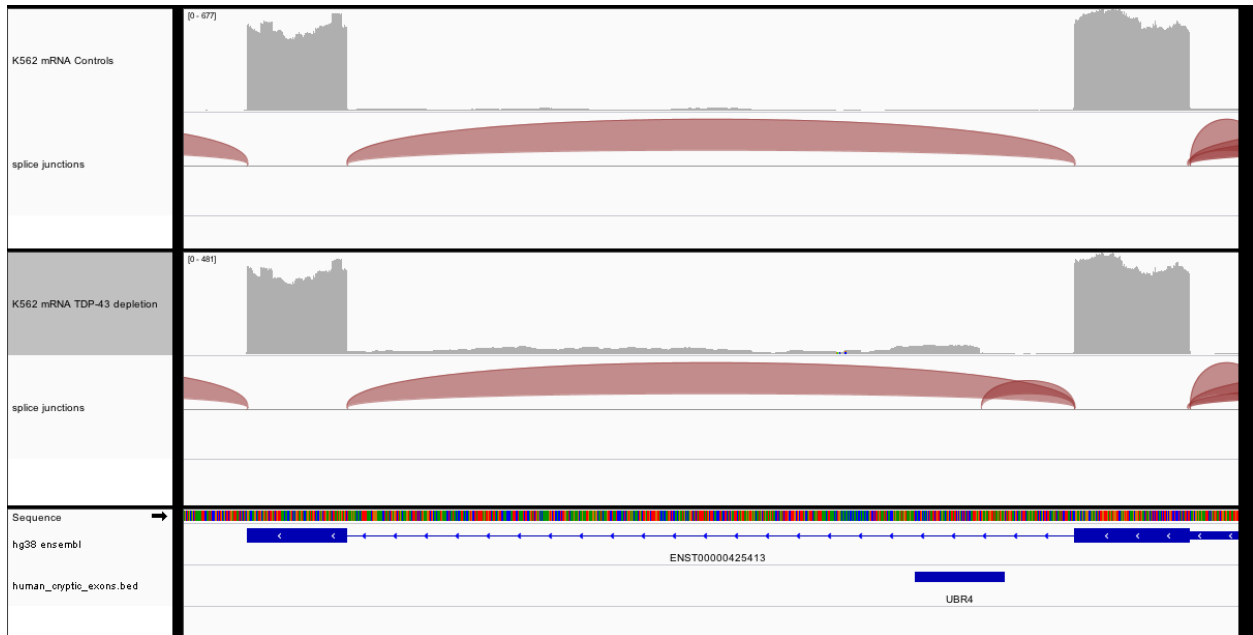

## Human K562 total RNA

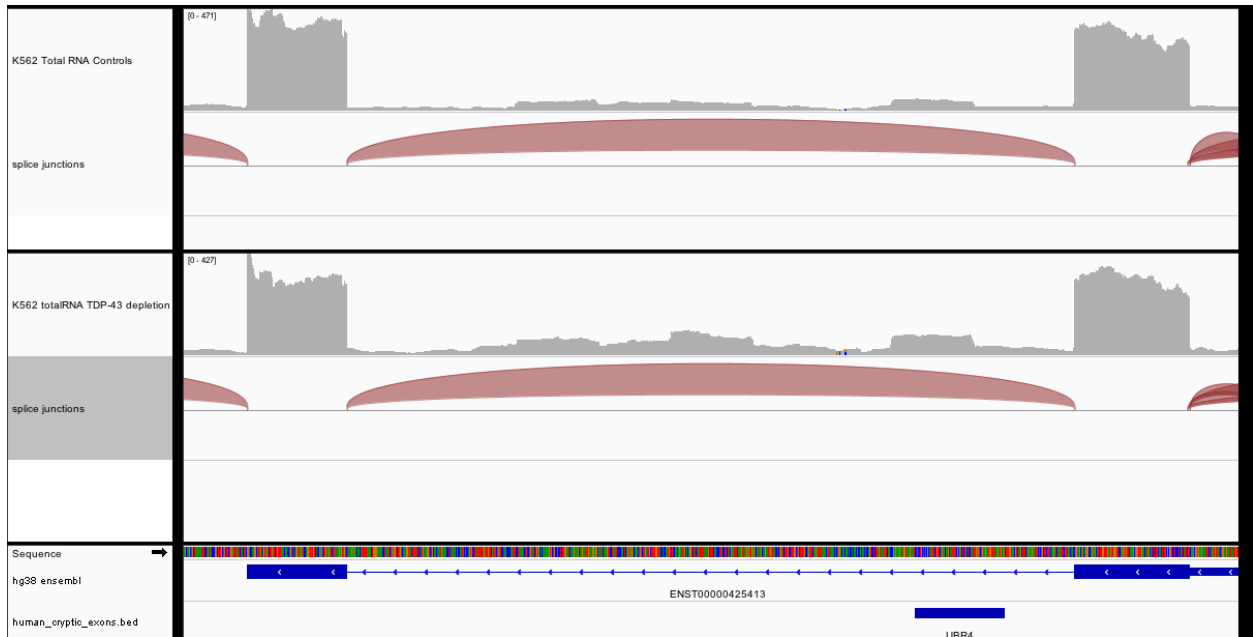

# 15 ANKRD27 E019i1

## Human K562 mRNA

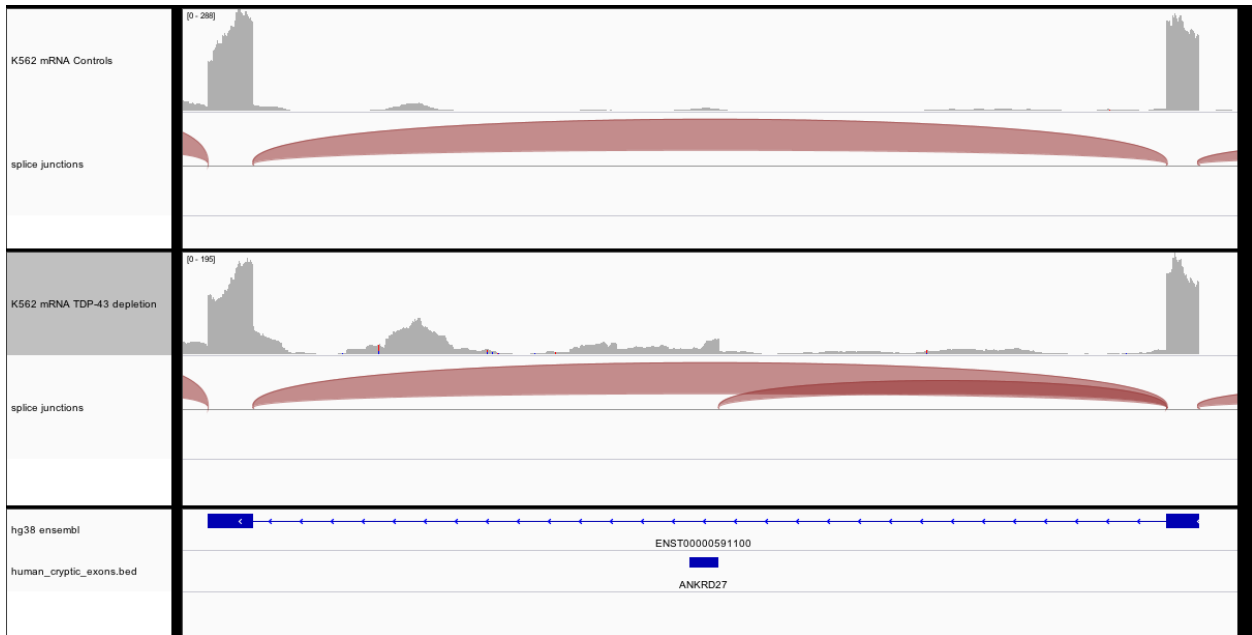

## Human K562 total RNA

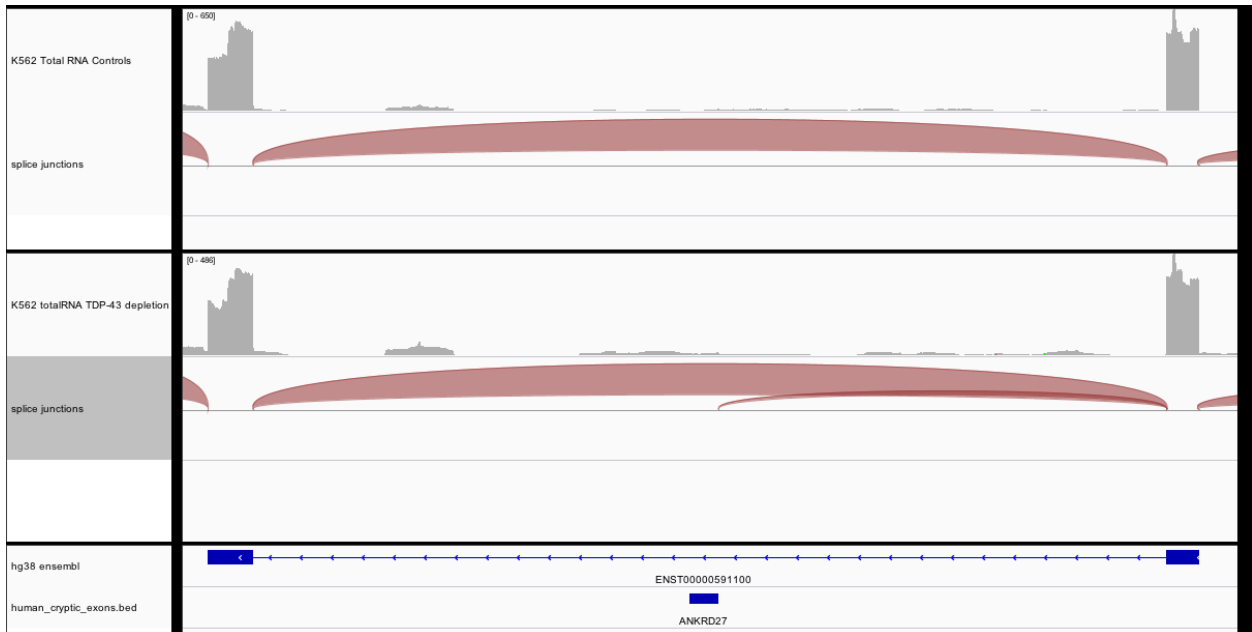



# 16 CCDC77 E020i1

## Human K562 mRNA

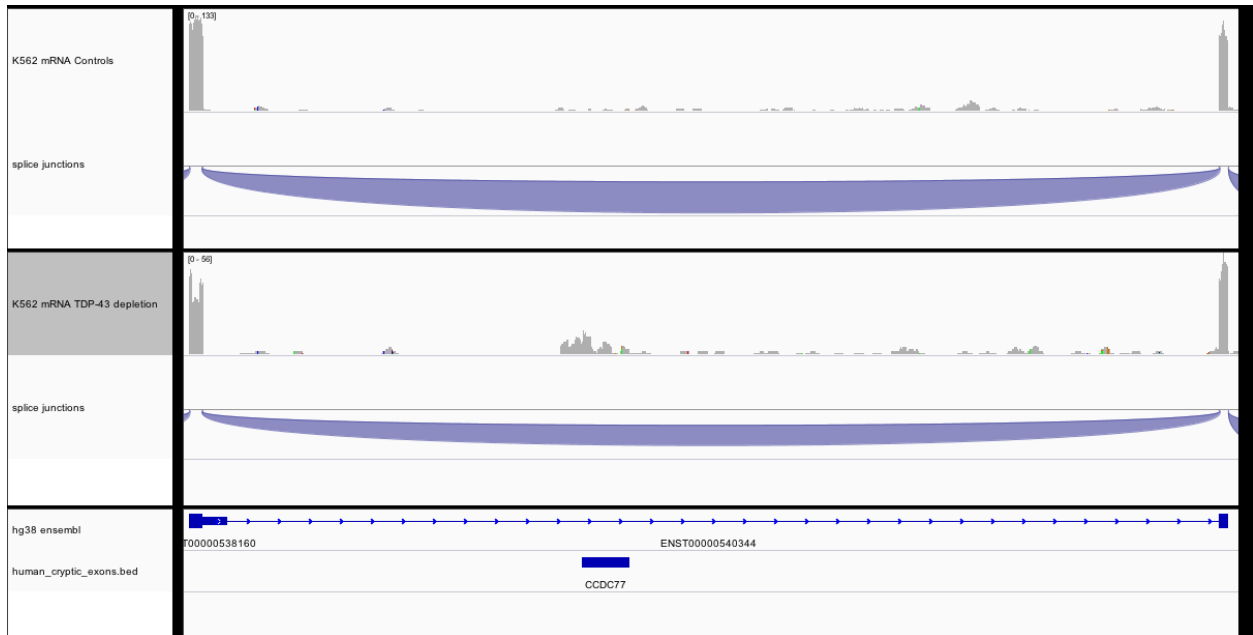

## Human K562 total RNA

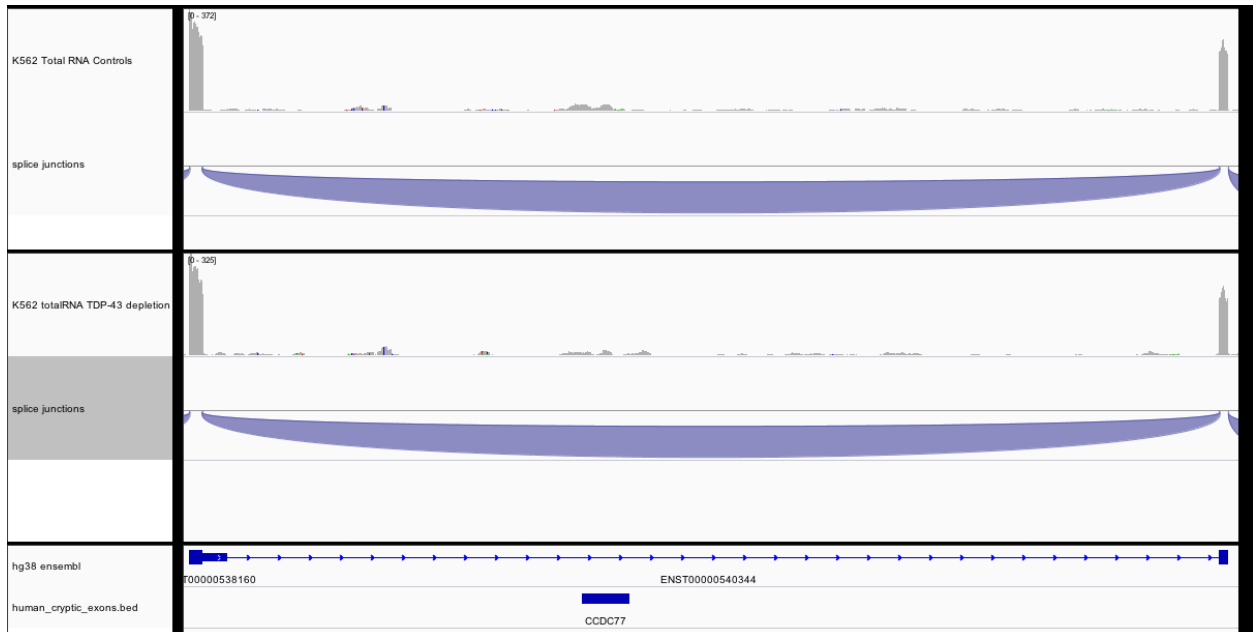

# 17 LRPPRC E024i1

Human K562 mRNA

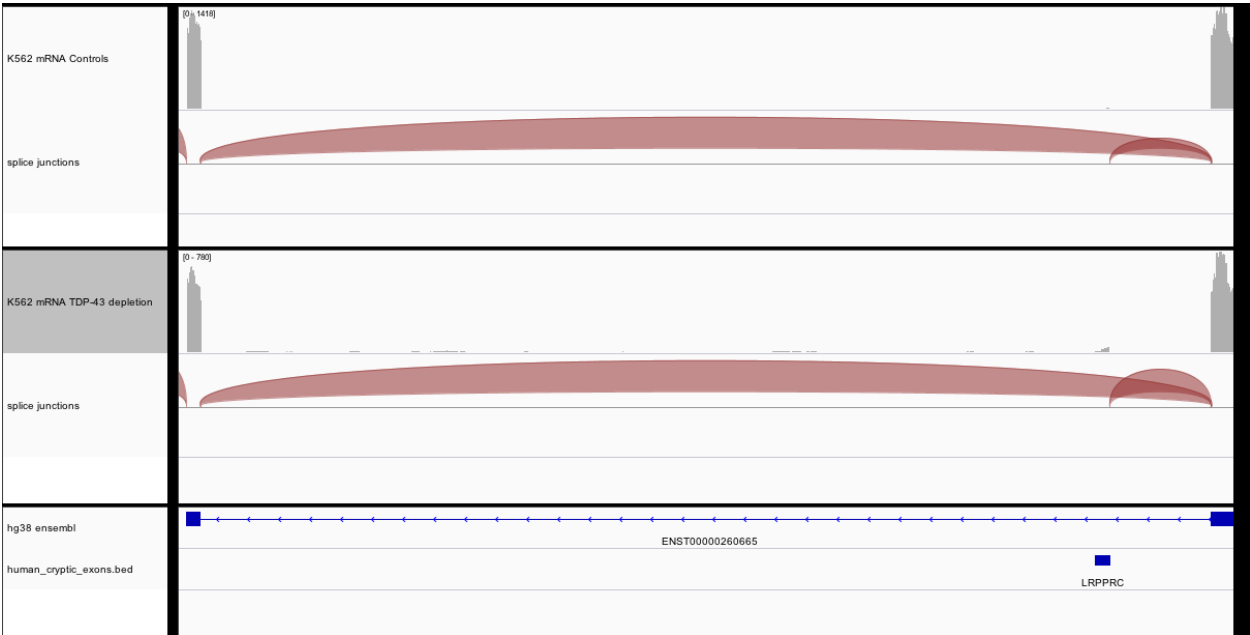

Human K562 total RNA

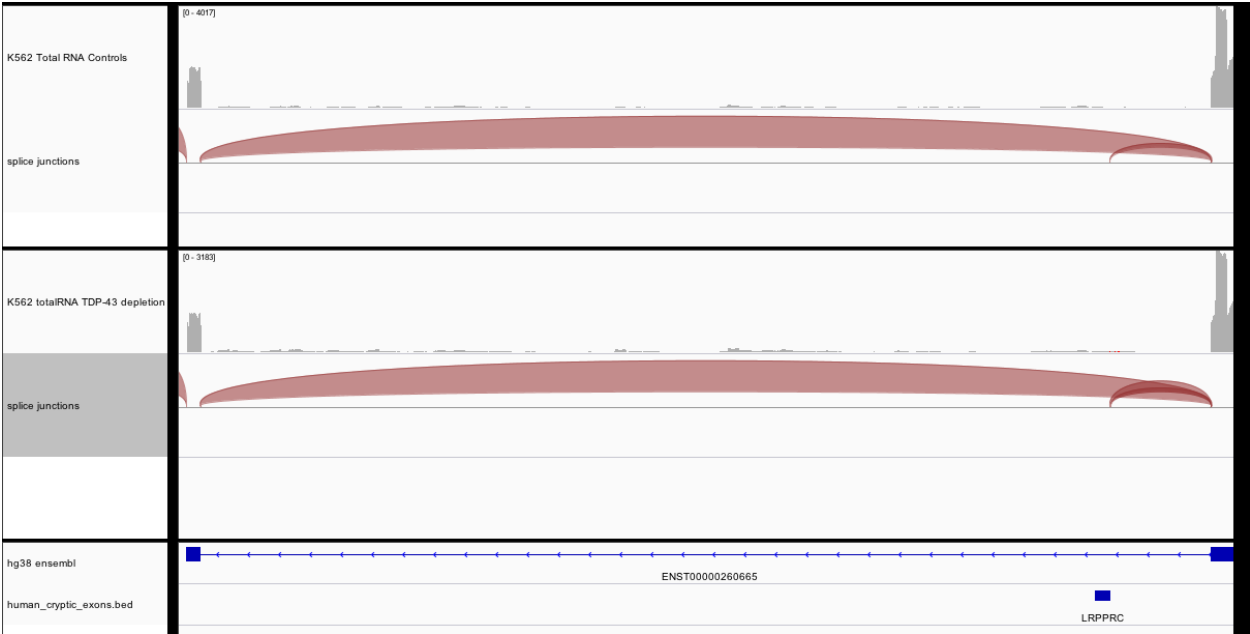

# 18 ADGRV1 E085i1

Human K562 mRNA

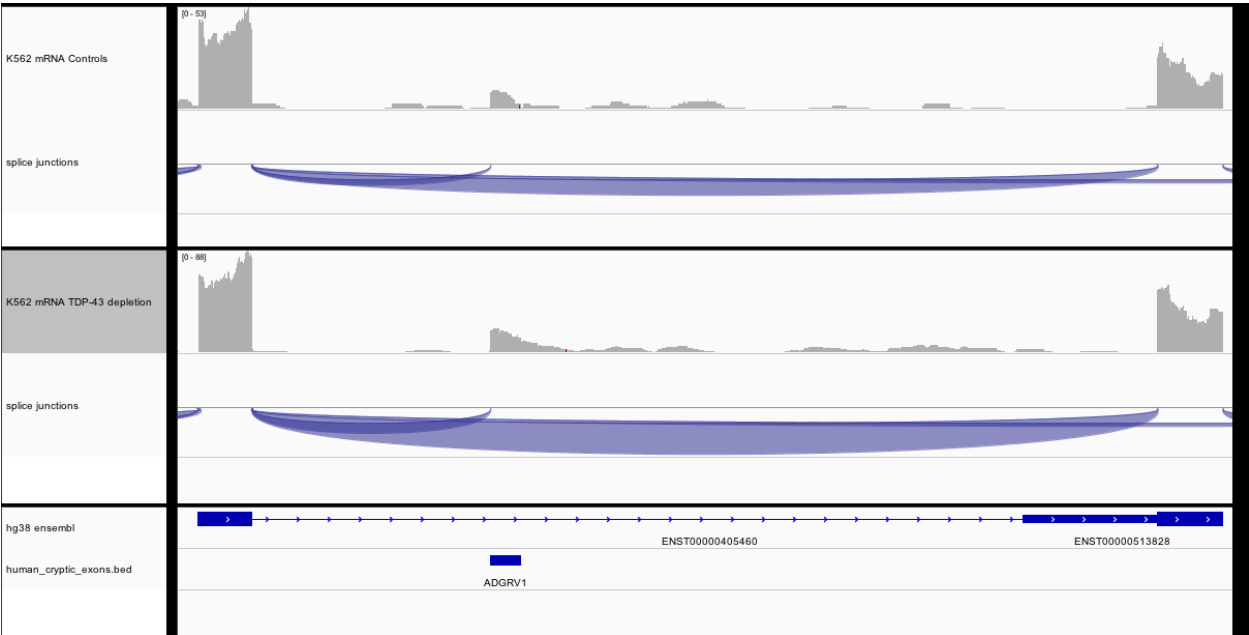

Human K562 total RNA

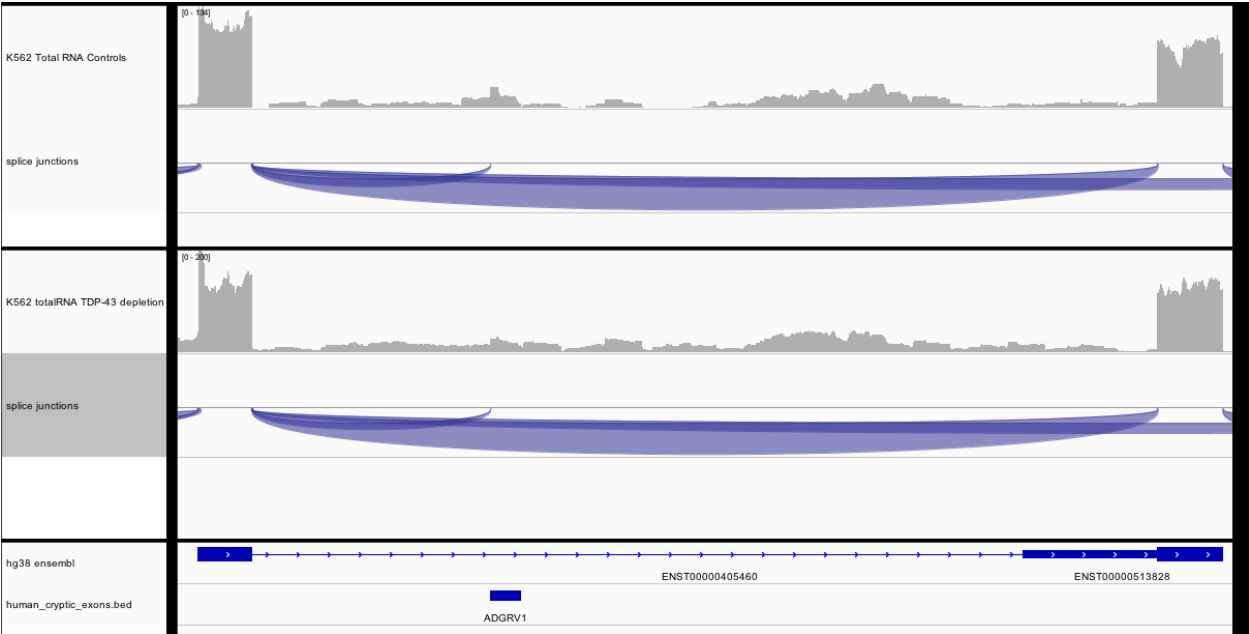

# 19 ASNSP1 E006i1

## Human K562 mRNA

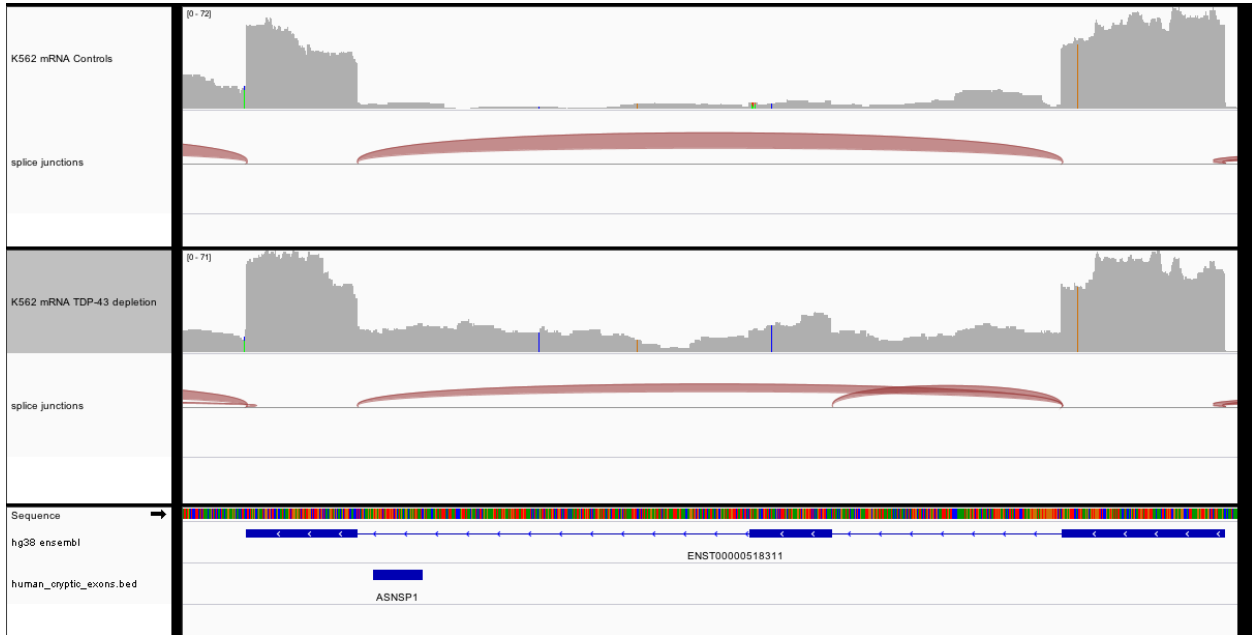

## Human K562 total RNA

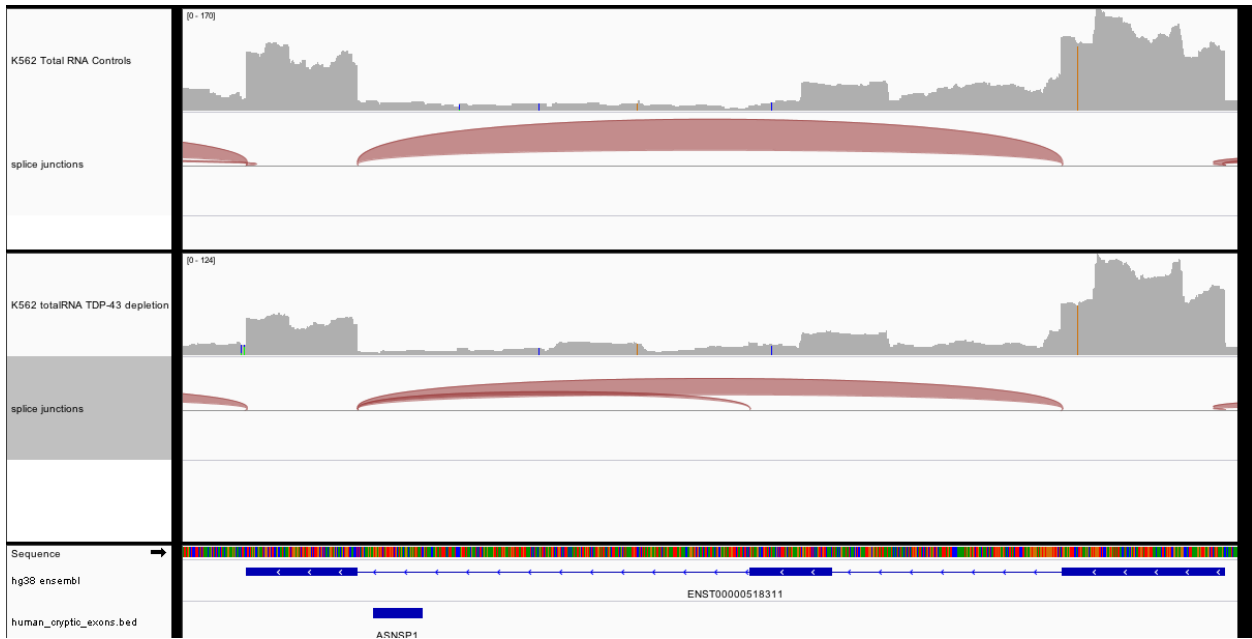

# 20 SMAD2 E010i1

## Human K562 mRNA

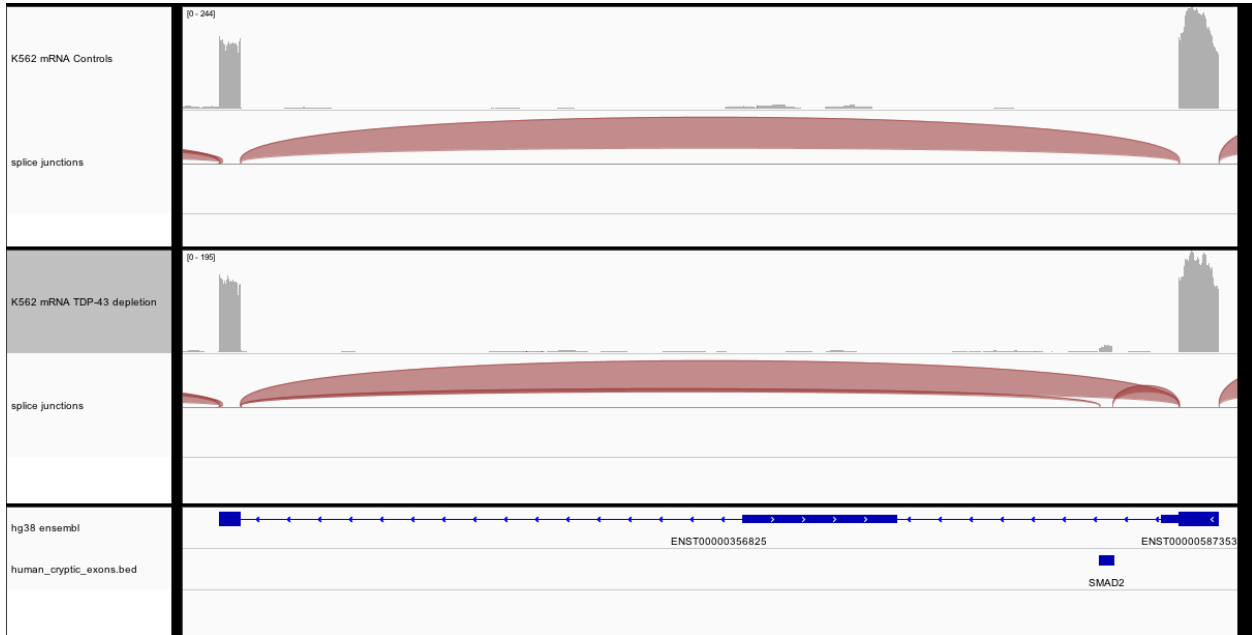

## Human K562 total RNA

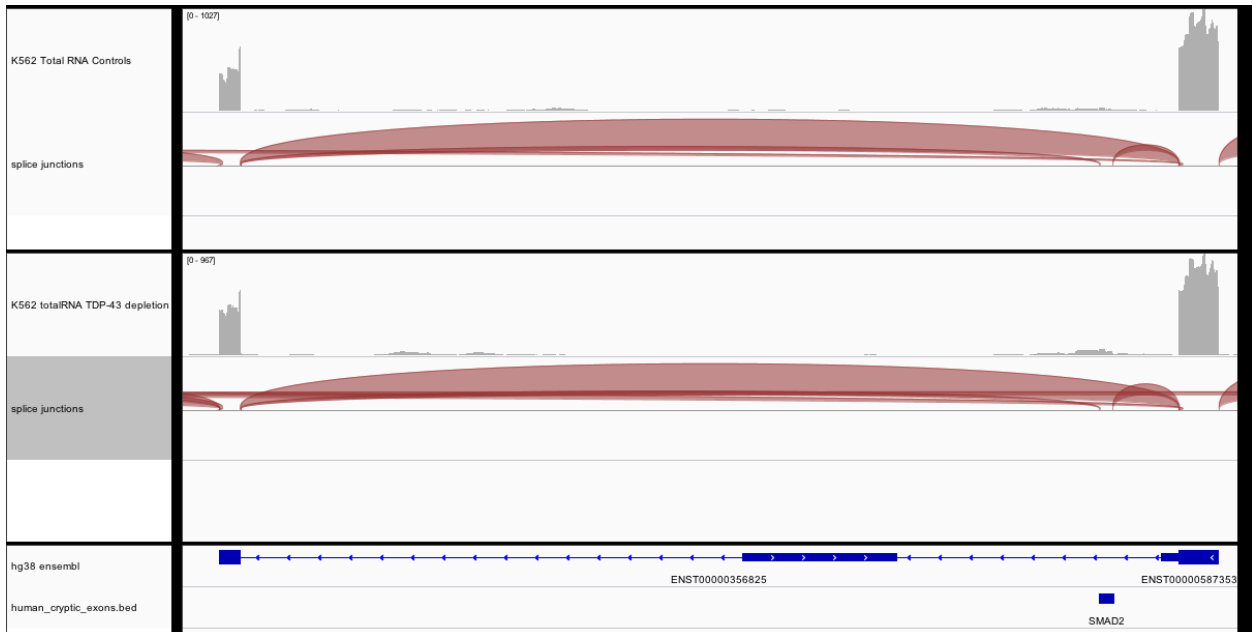

# 21 ZNHIT6 E003i1

## Human K562 mRNA

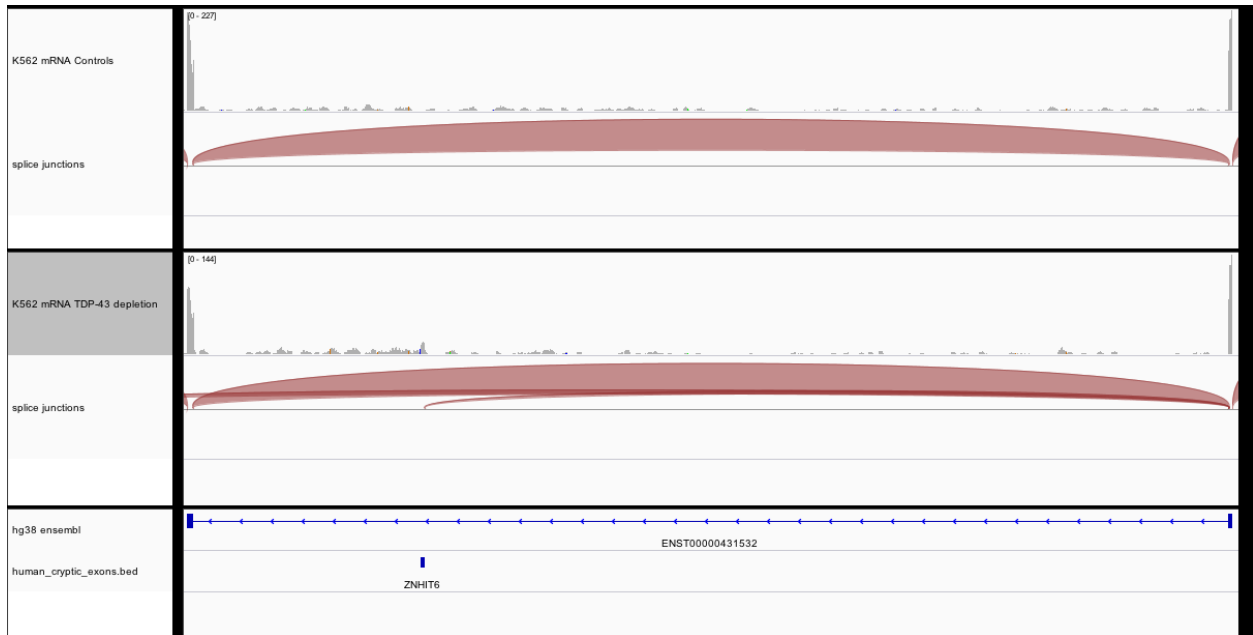

## Human K562 total RNA

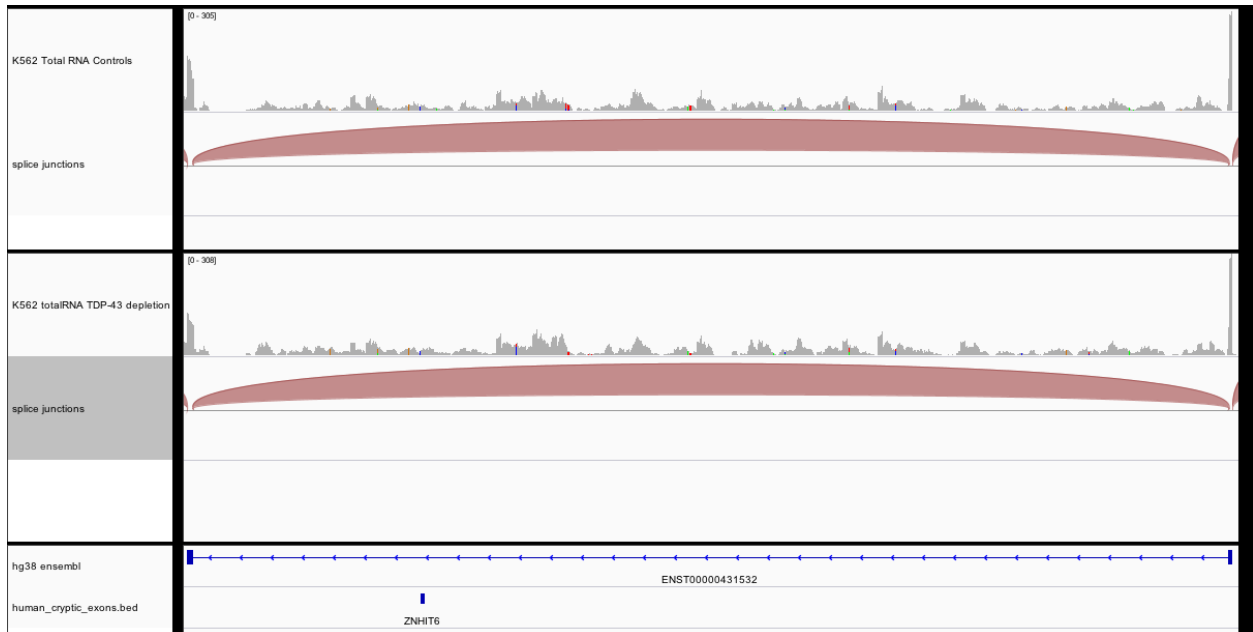

## 22 NLRP1 E045i1

Human K562 mRNA

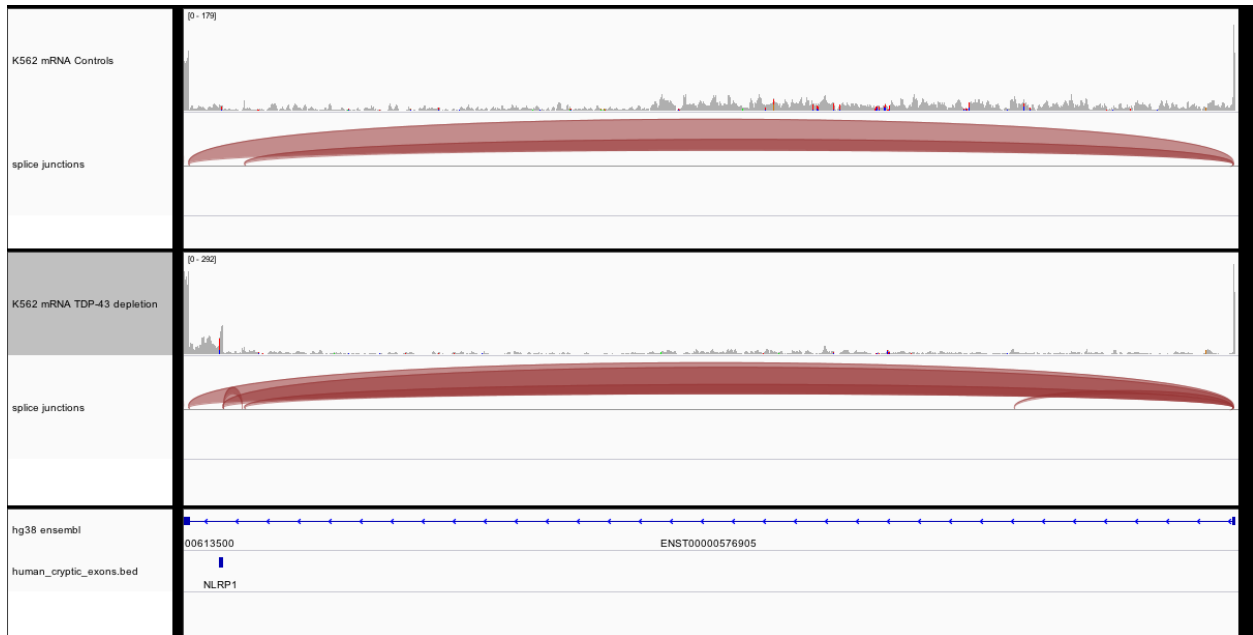

Human K562 total RNA

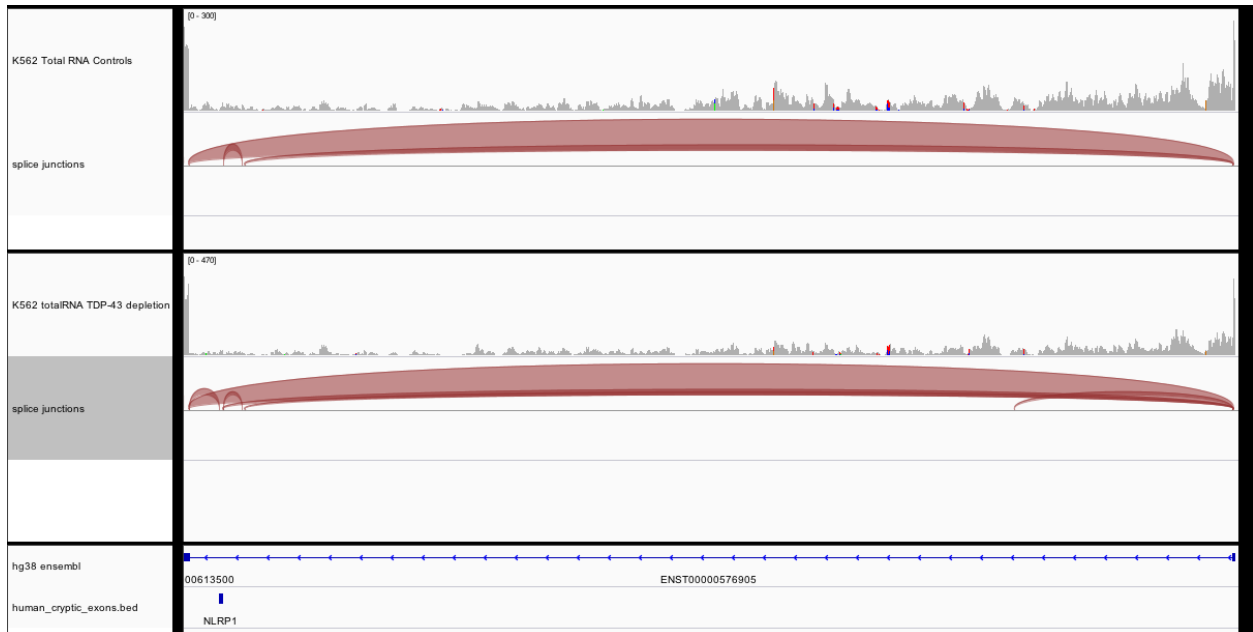

# 23 CEP290 E024i1

## Human K562 mRNA

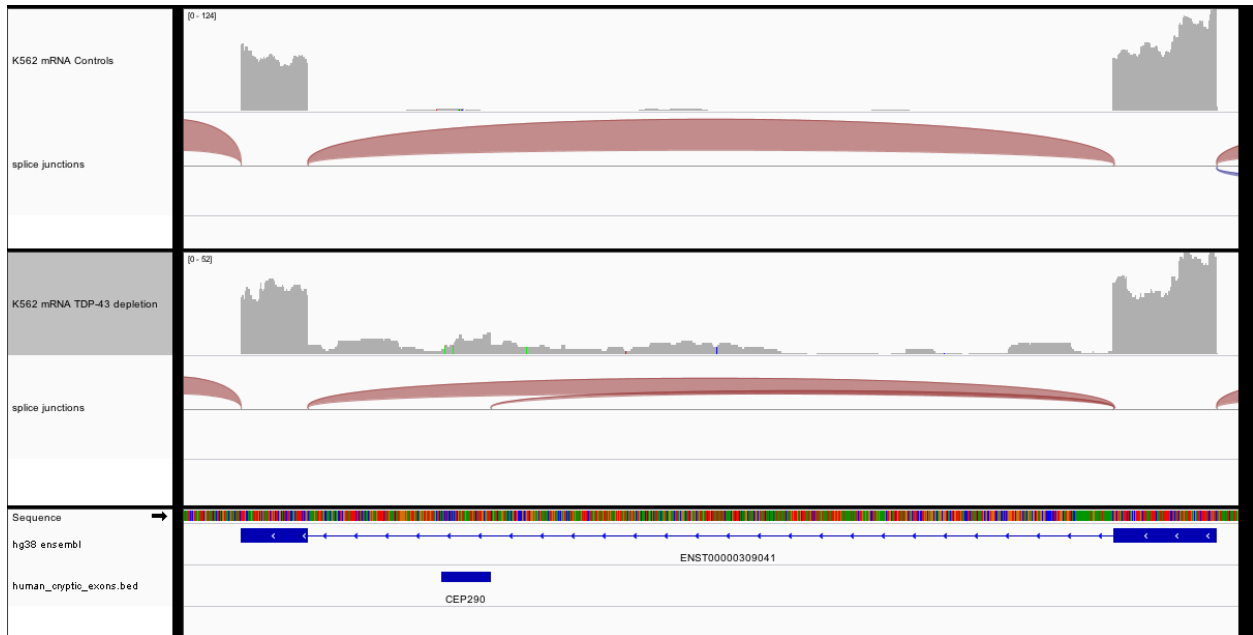

## Human K562 total RNA

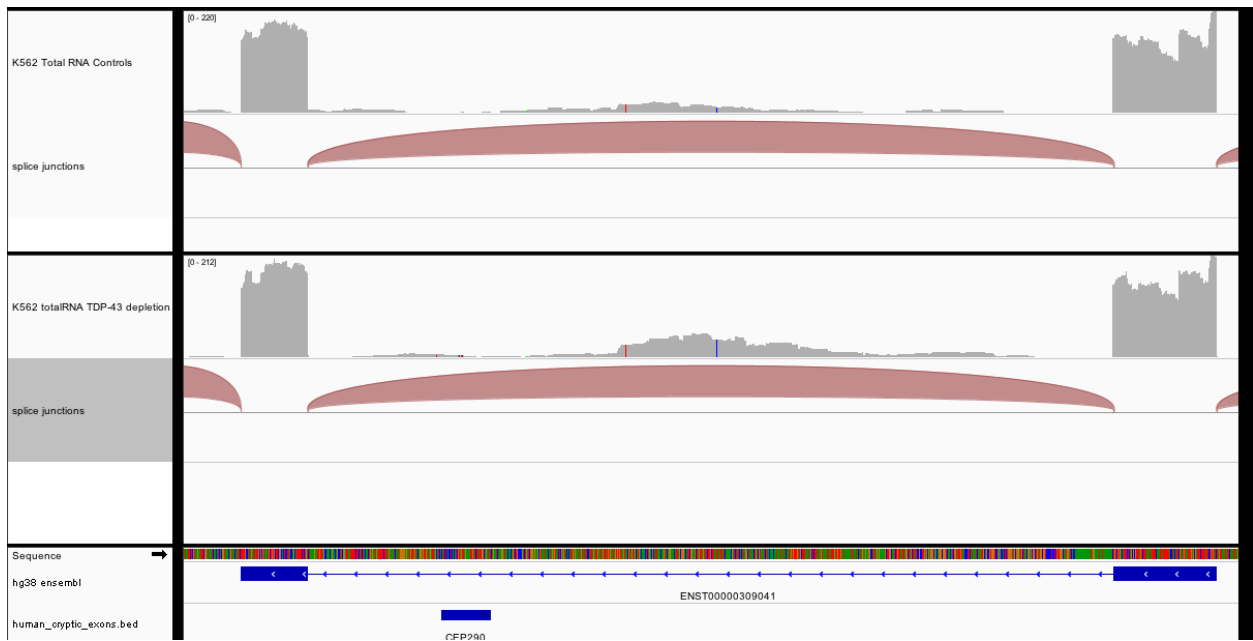



## 24 METTL8 E037i1

### Human K562 mRNA

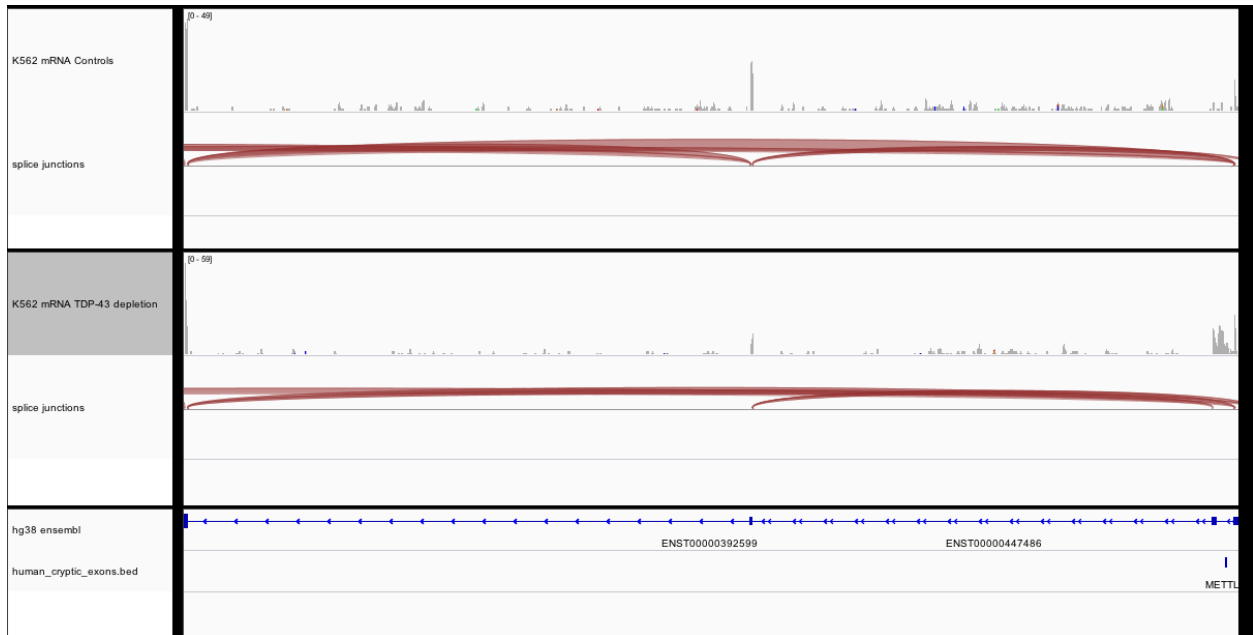

### Human K562 total RNA

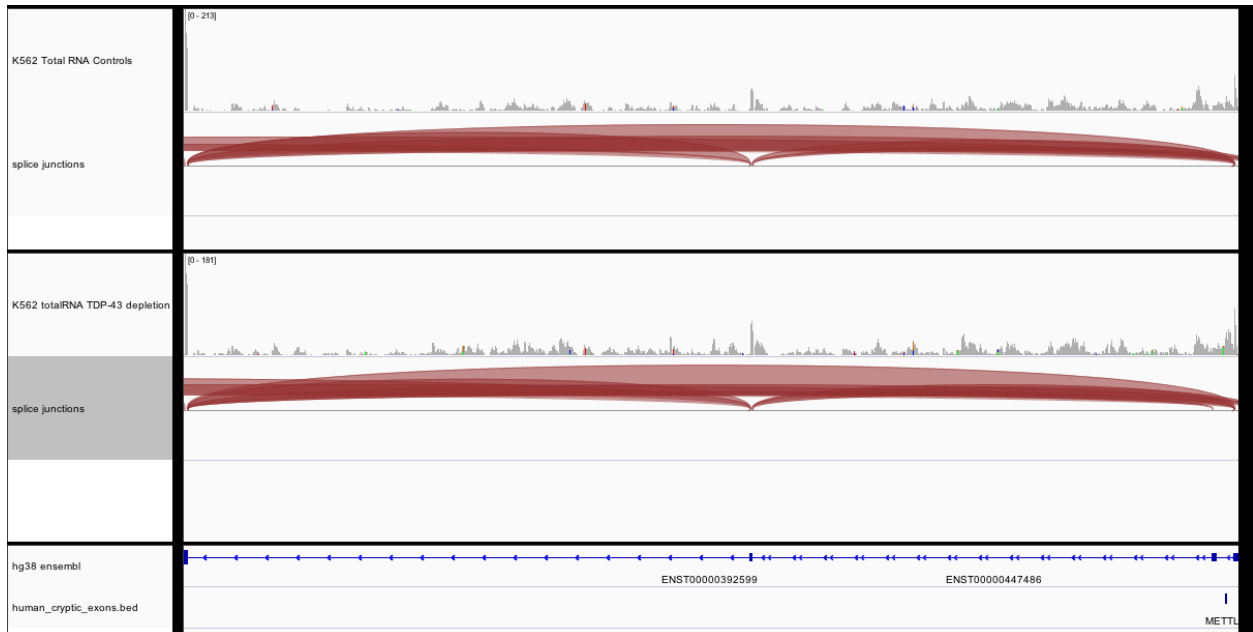

# 25 MPDZ E015i1

## Human K562 mRNA

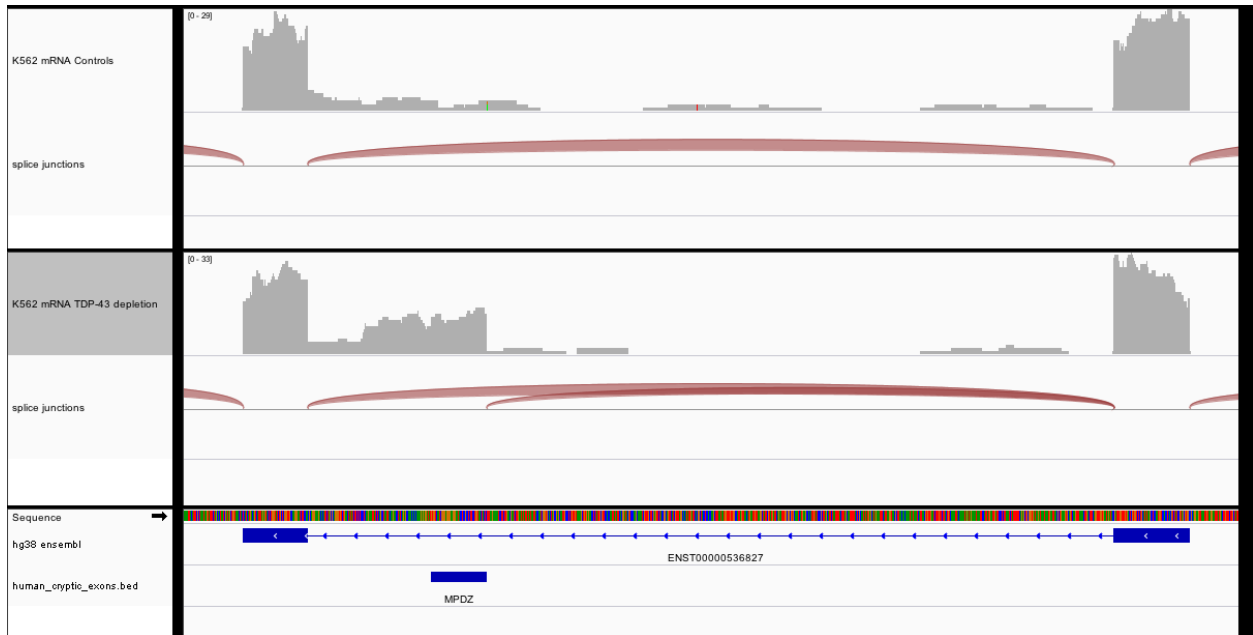

## Human K562 total RNA

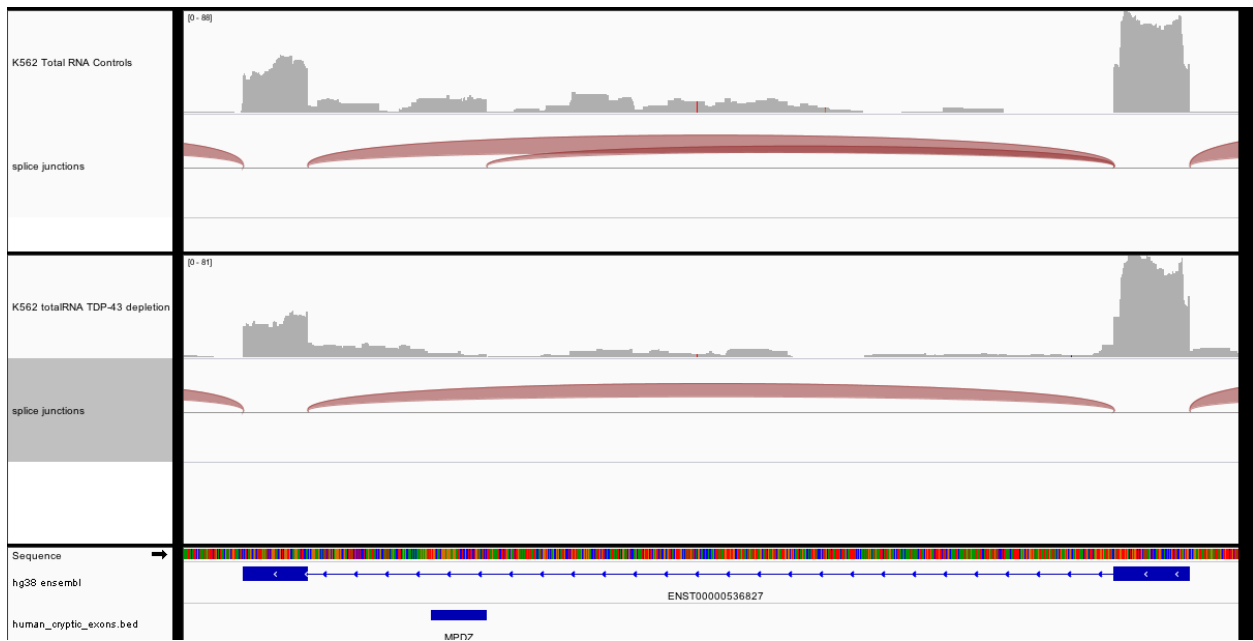

## 26 ERBB2IP E013i2

Human K562 mRNA

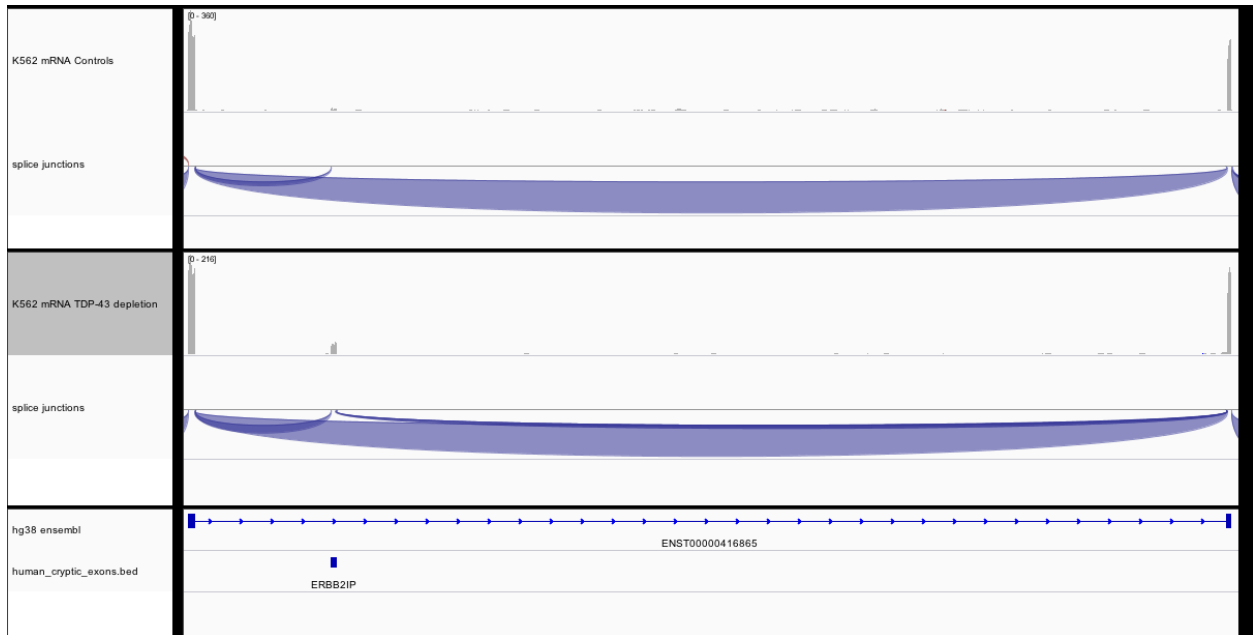

Human K562 total RNA

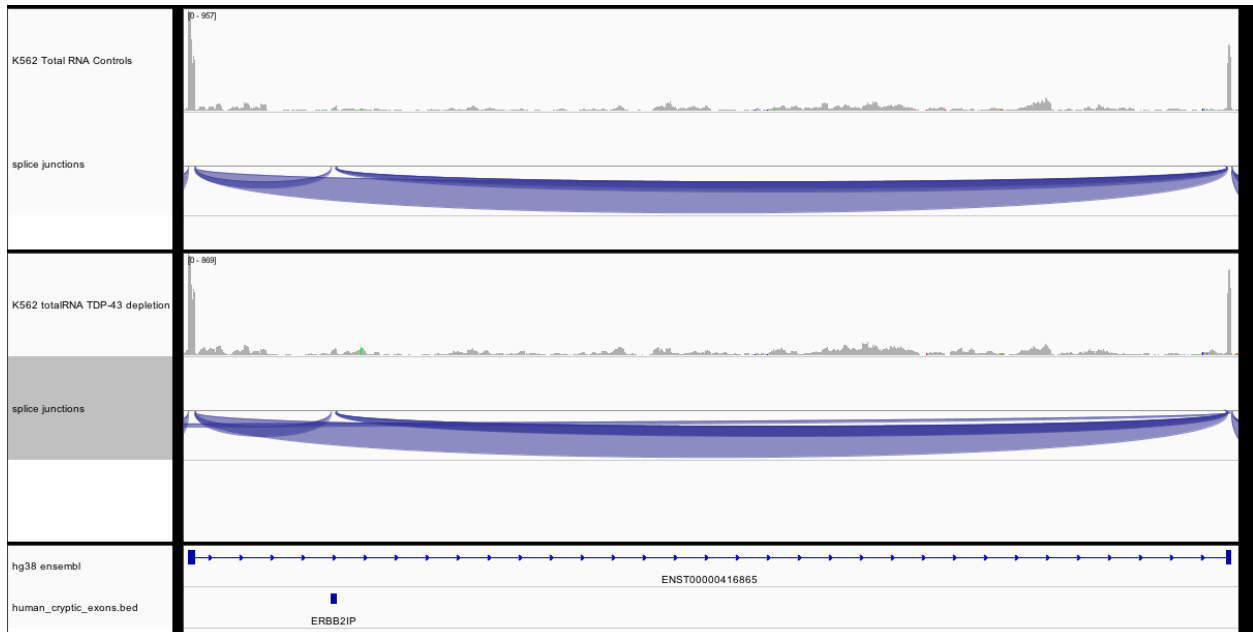

# 27 PRPF40A E001i1

Human K562 mRNA

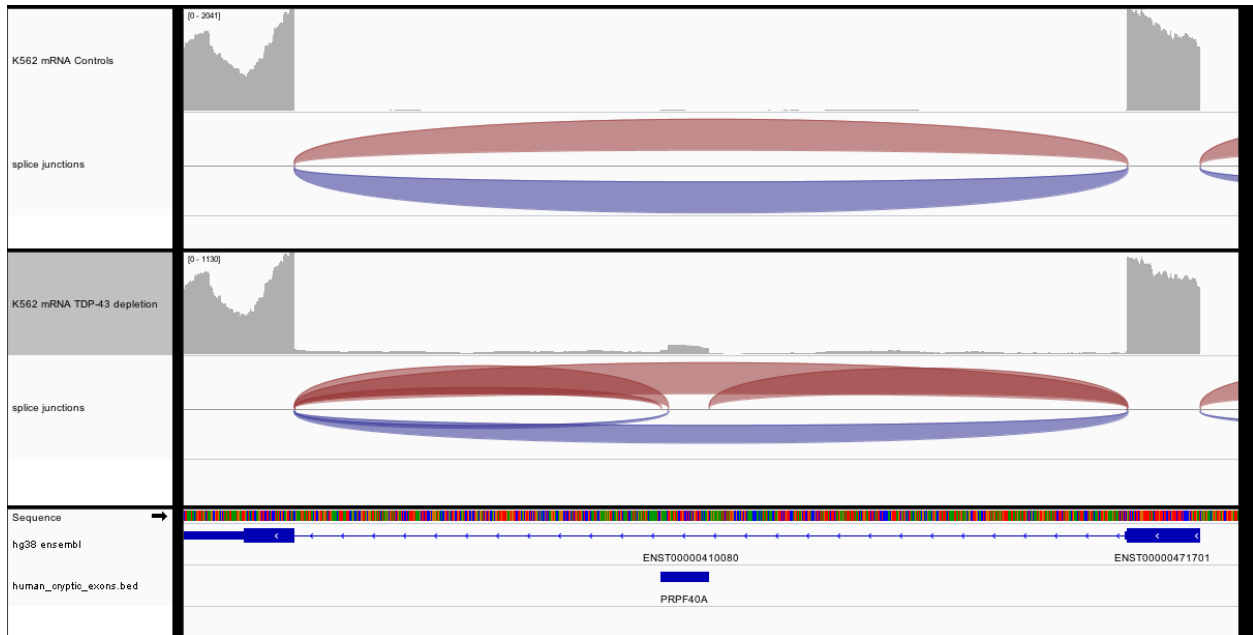

Human K562 total RNA

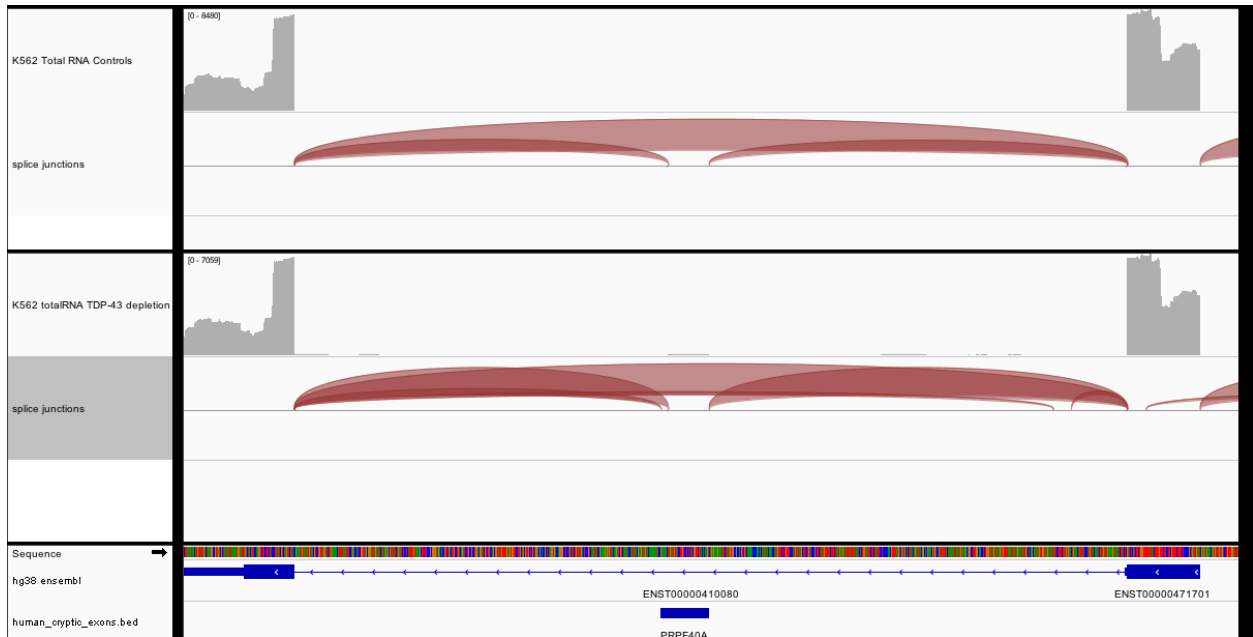

# 28 UPF2 E002i1

## Human K562 mRNA

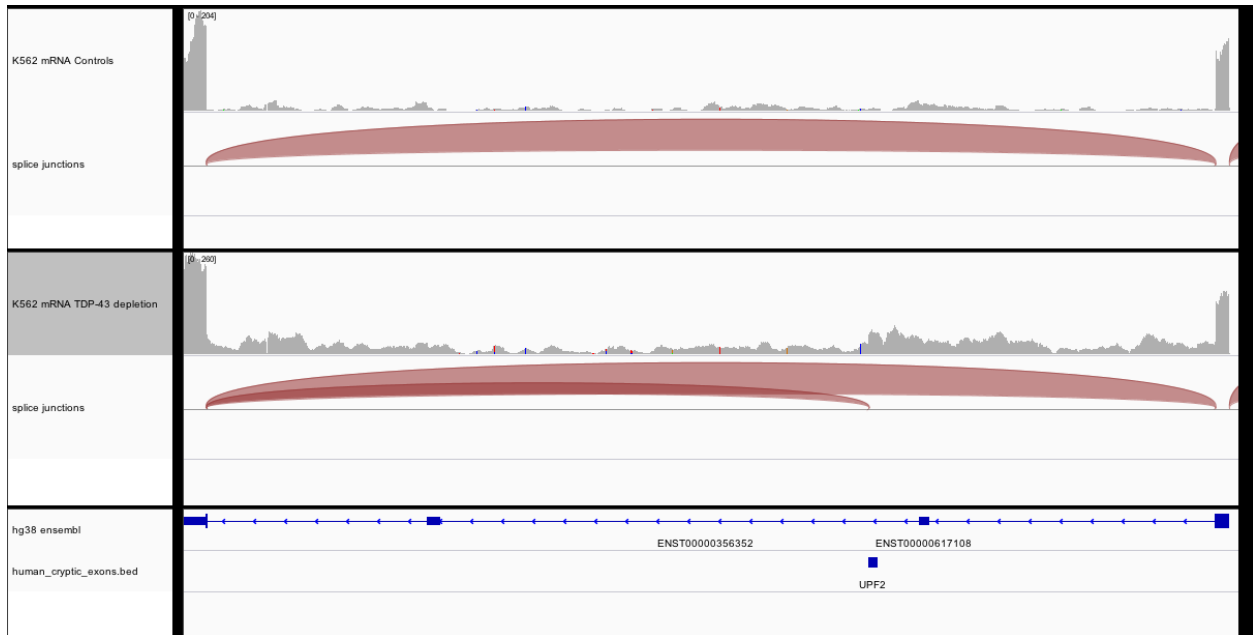

## Human K562 total RNA

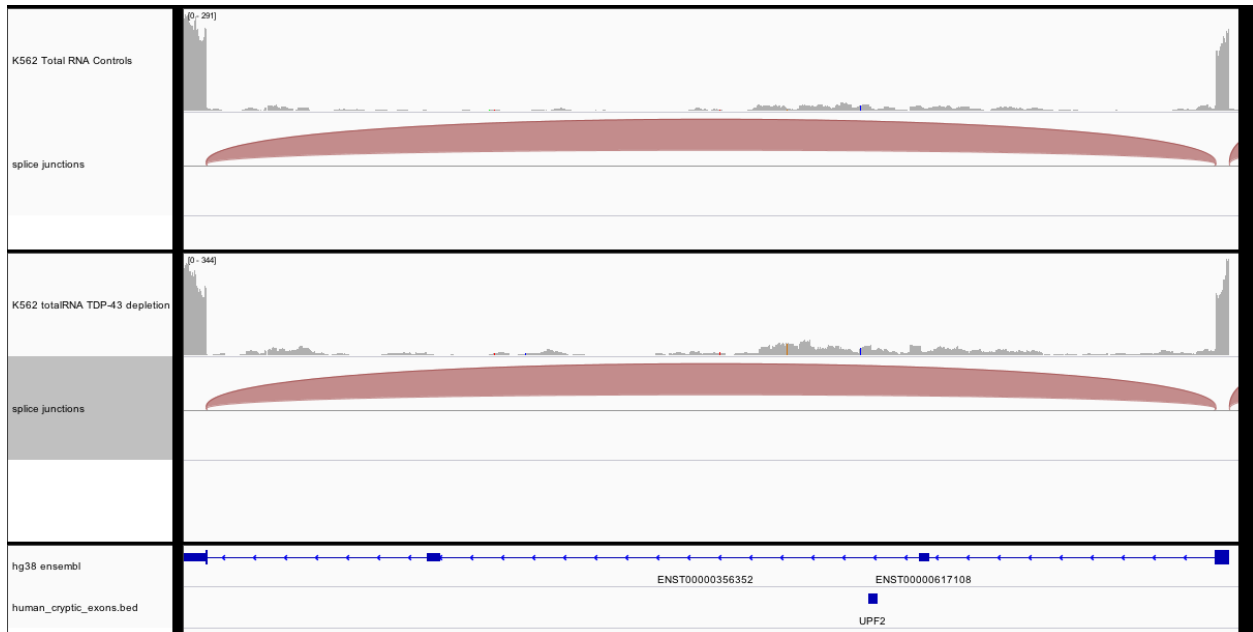

# 29 RRP1 E008i1

## Human K562 mRNA

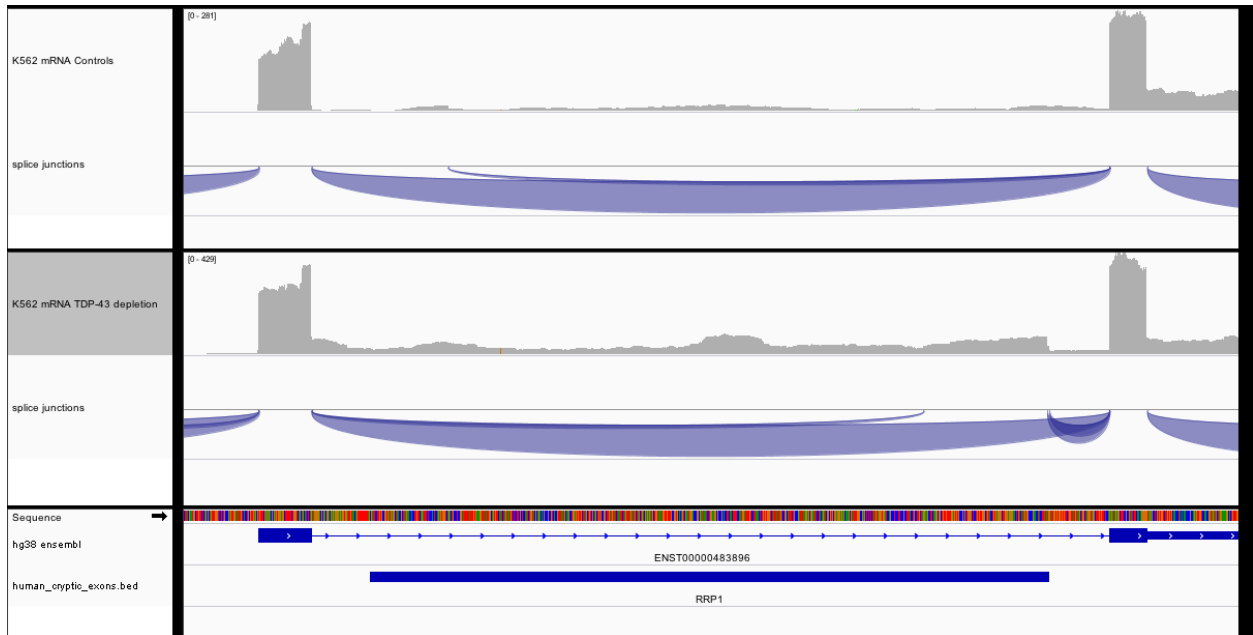

## Human K562 total RNA

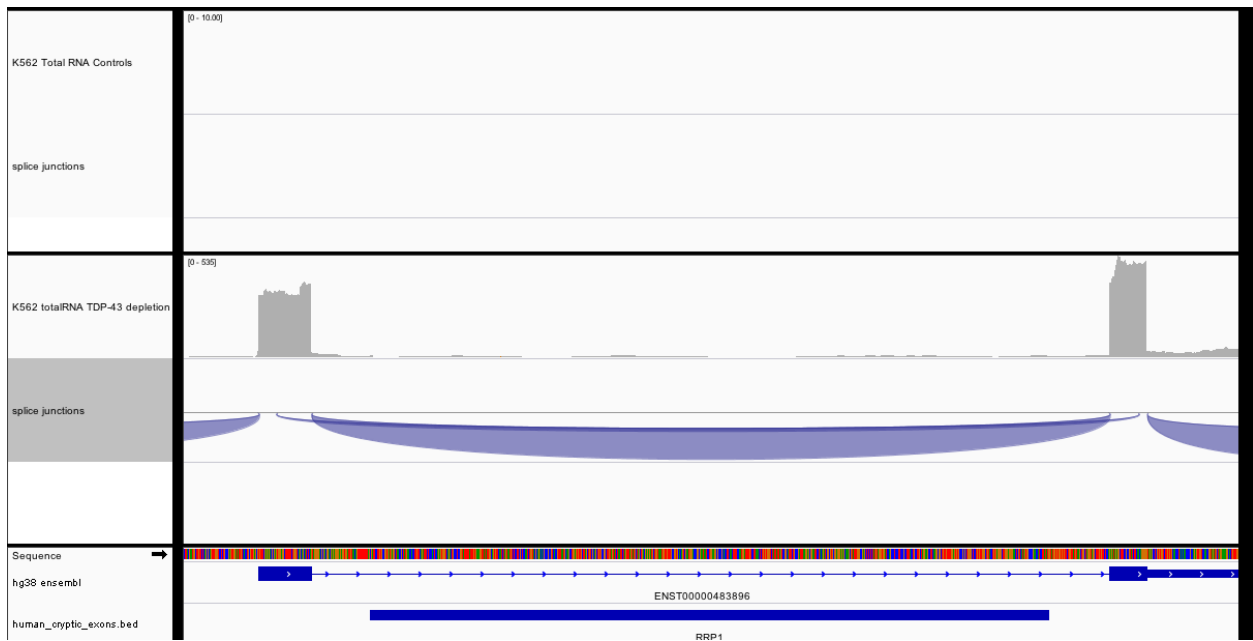

# 30 LRP8 E033i1

## Human K562 mRNA

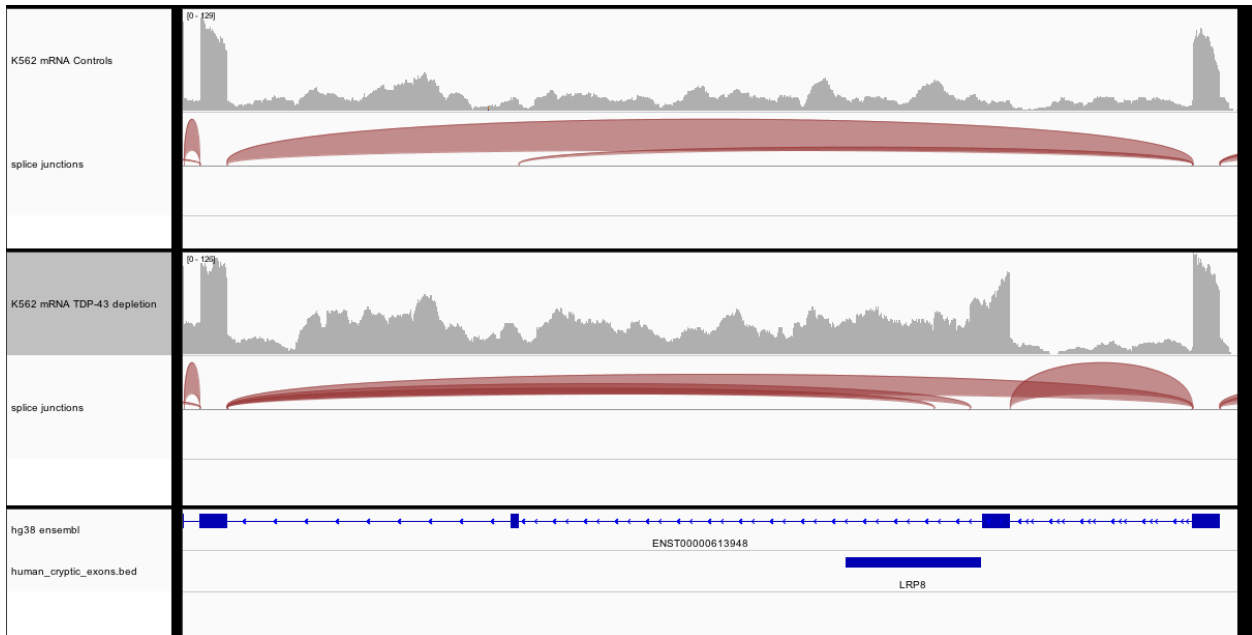

## Human K562 total RNA

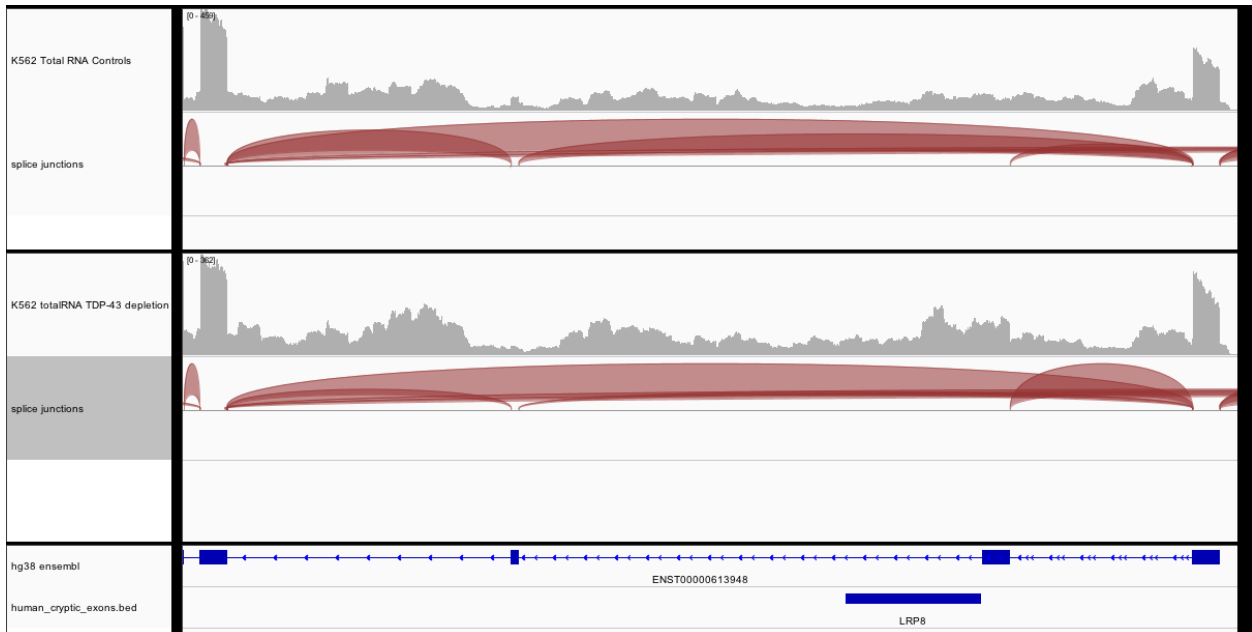

# 31 PKP4 E020i1

## Human K562 mRNA

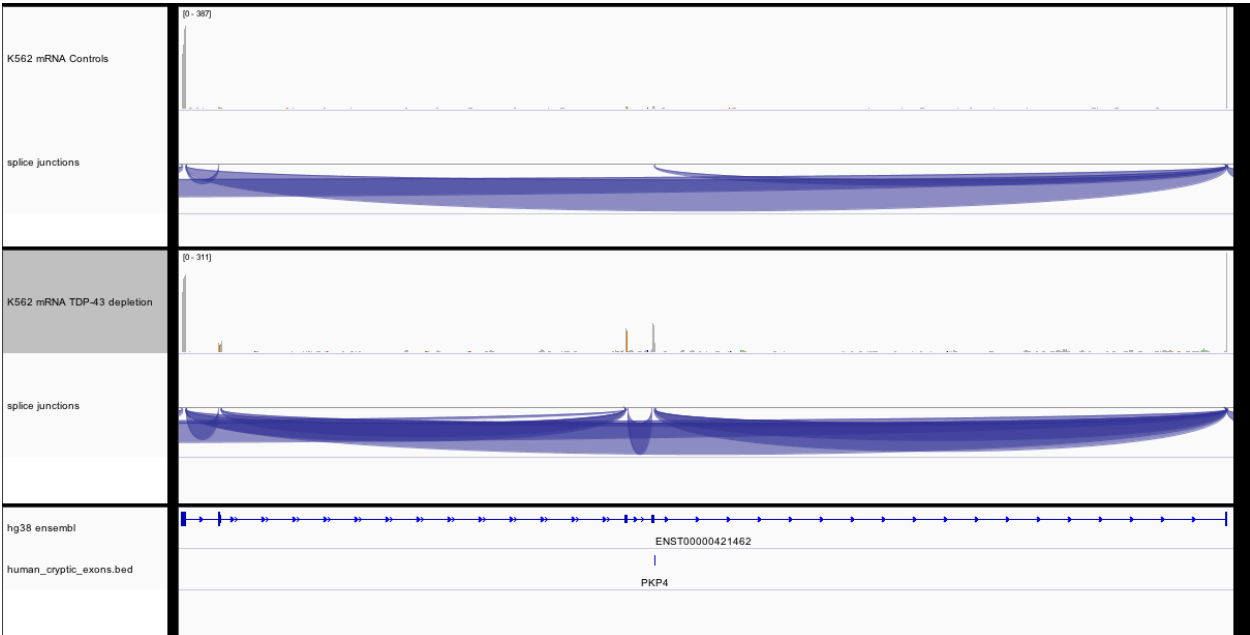

## Human K562 total RNA

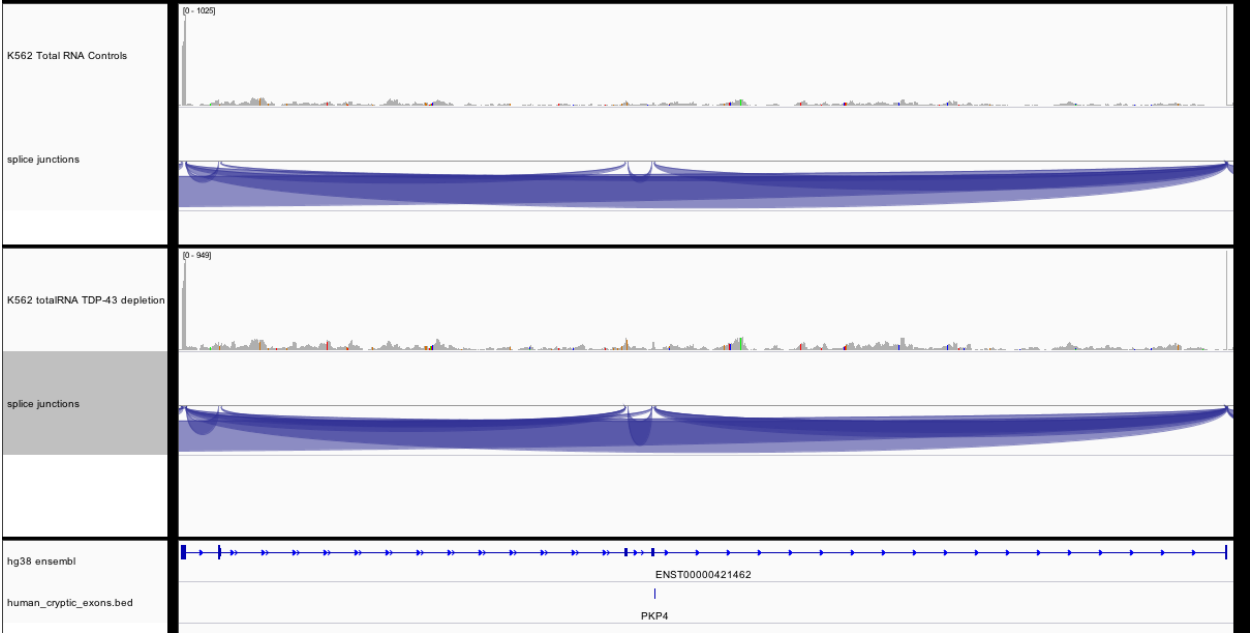



# 32 DDX52 E022i1

## Human K562 mRNA

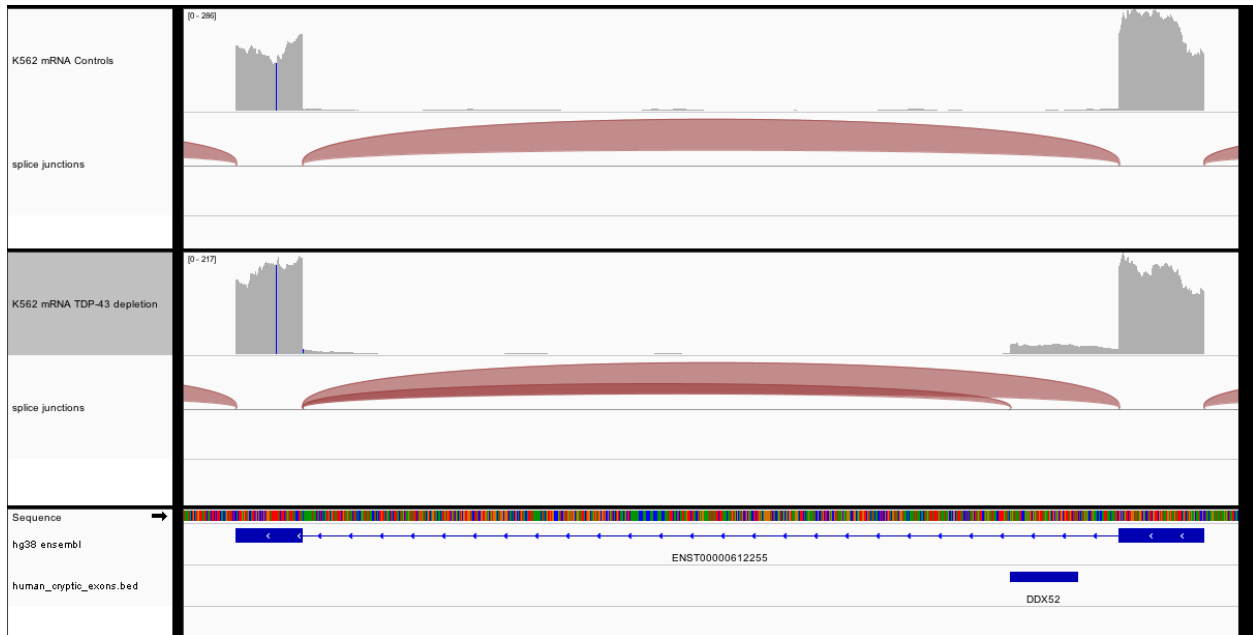

## Human K562 total RNA

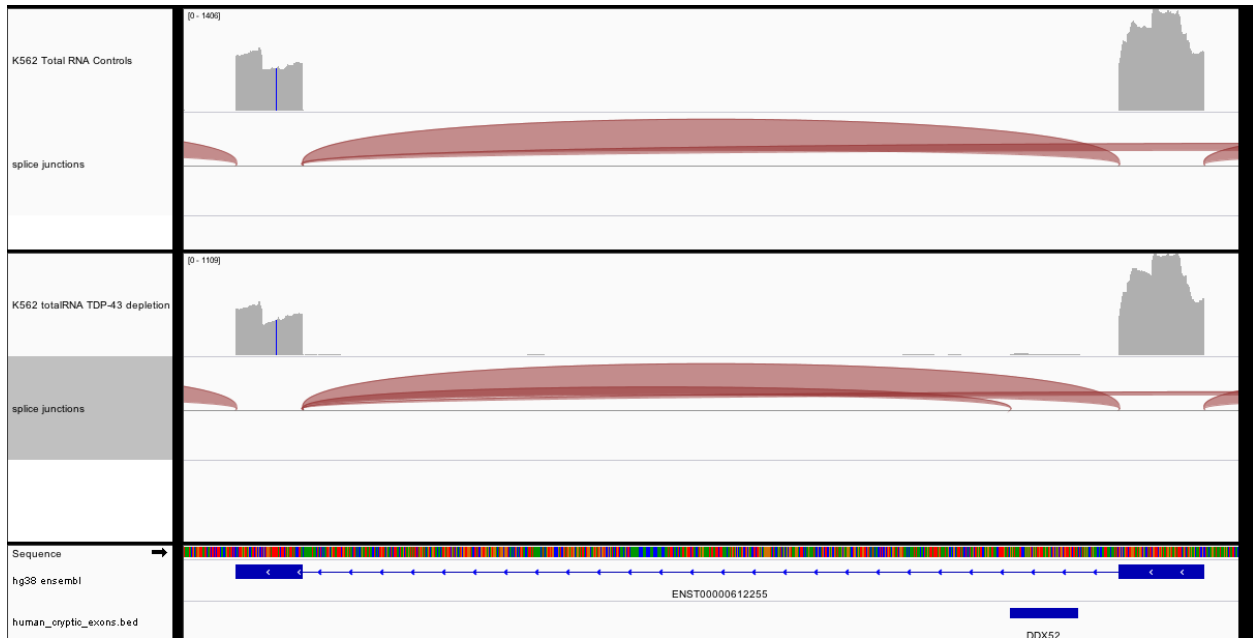

### 33 SETD5 E065i1

Human K562 mRNA

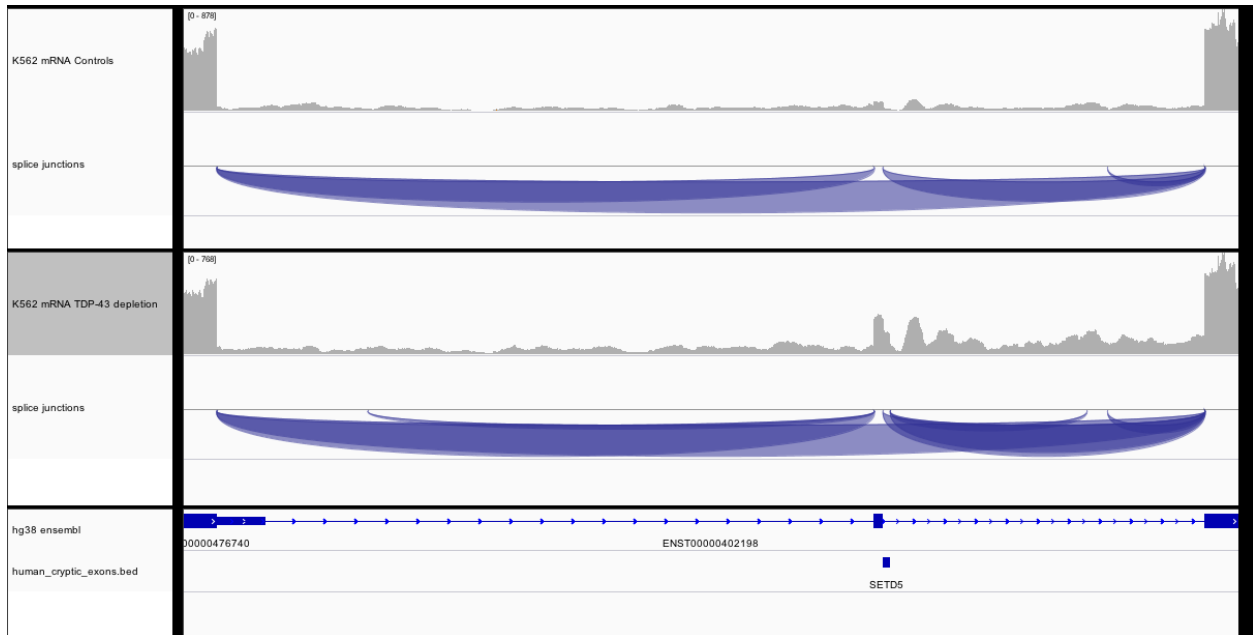

Human K562 total RNA

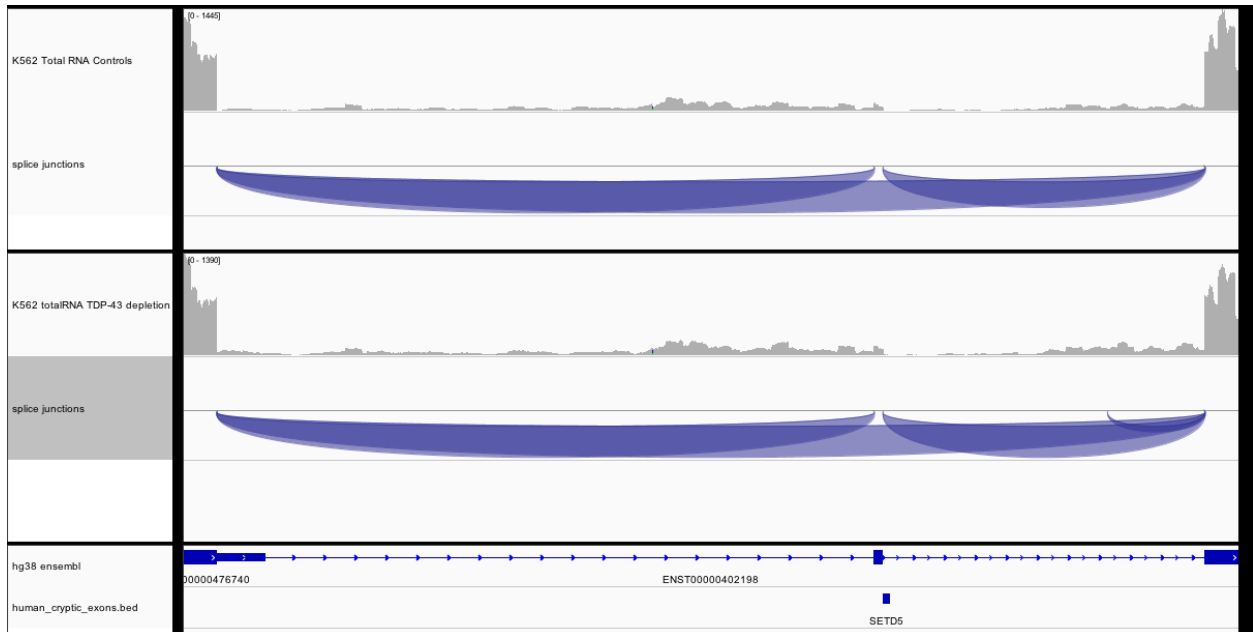

# 34 KDELC2 E018i2

## Human K562 mRNA

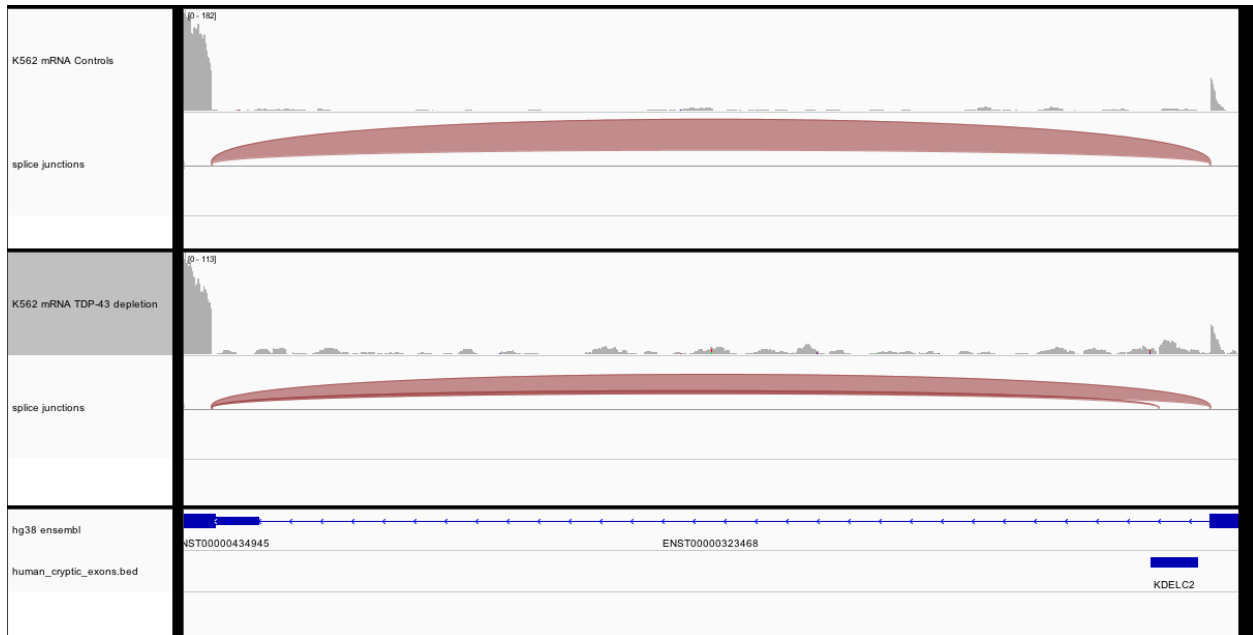

## Human K562 total RNA

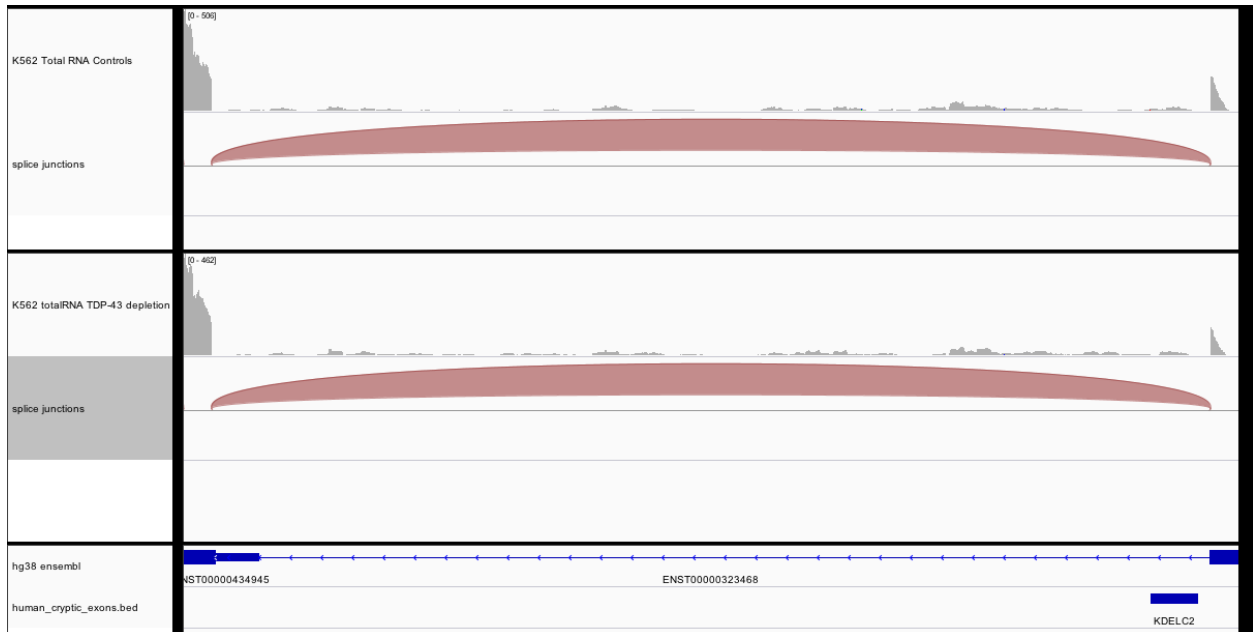

# 35 GPT2 E009i1

## Human K562 mRNA

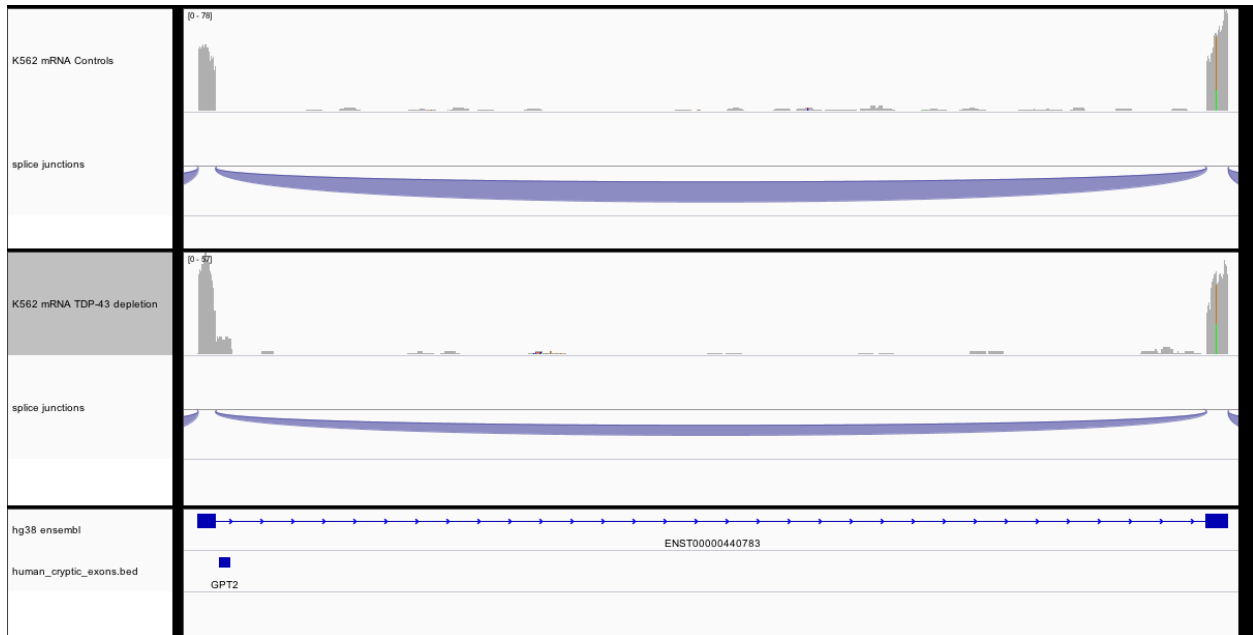

## Human K562 total RNA

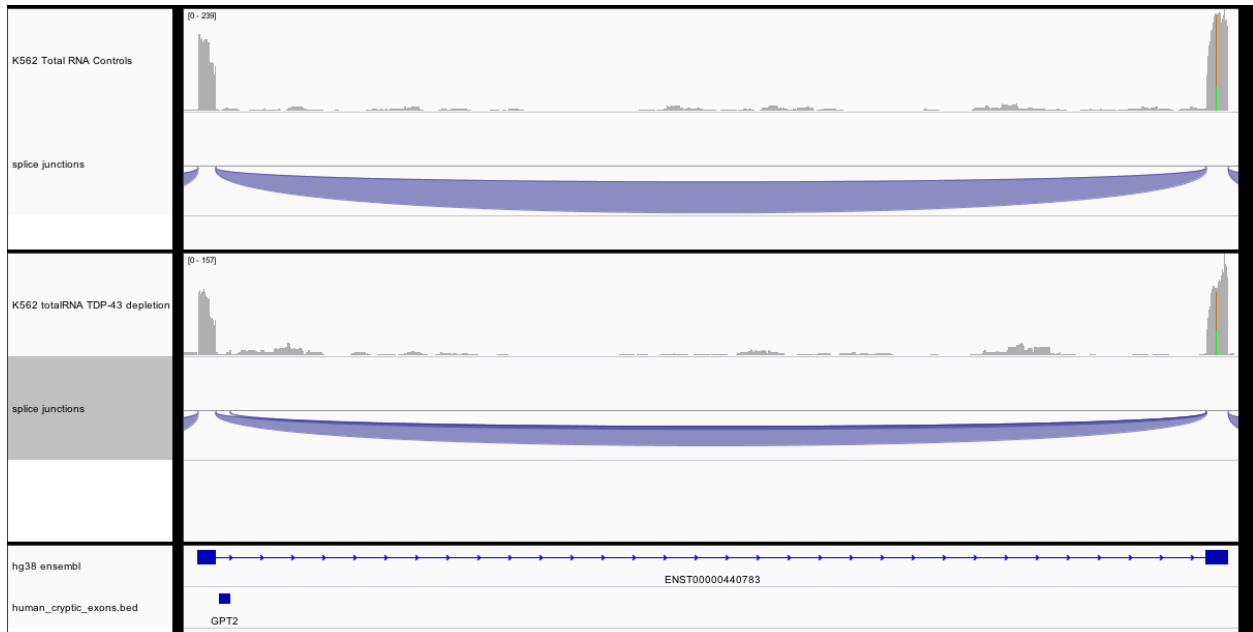

# 36 GSE1 E007i1

## Human K562 mRNA

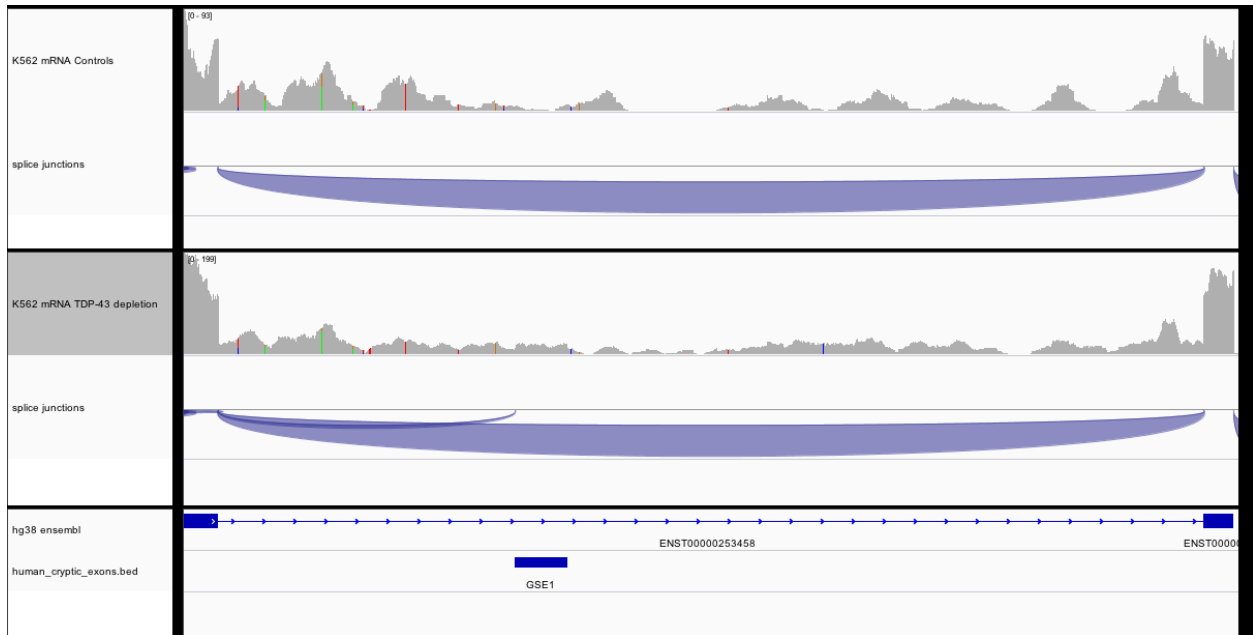

## Human K562 total RNA

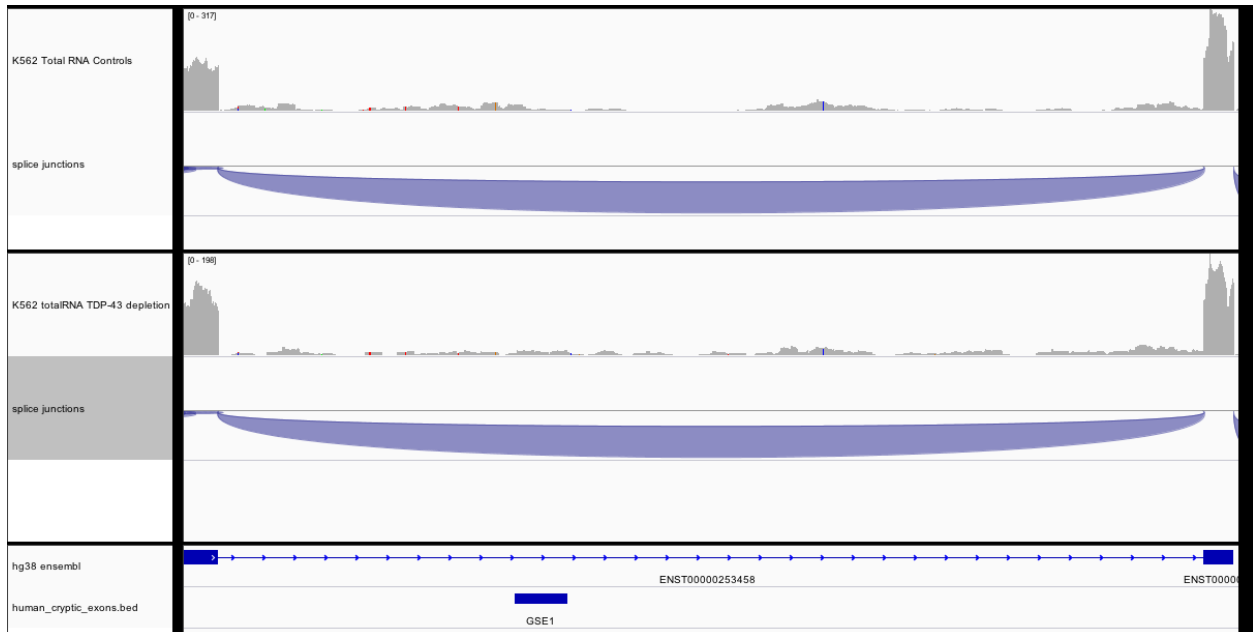

# 37 MBOAT2 E029i2

Human K562 mRNA

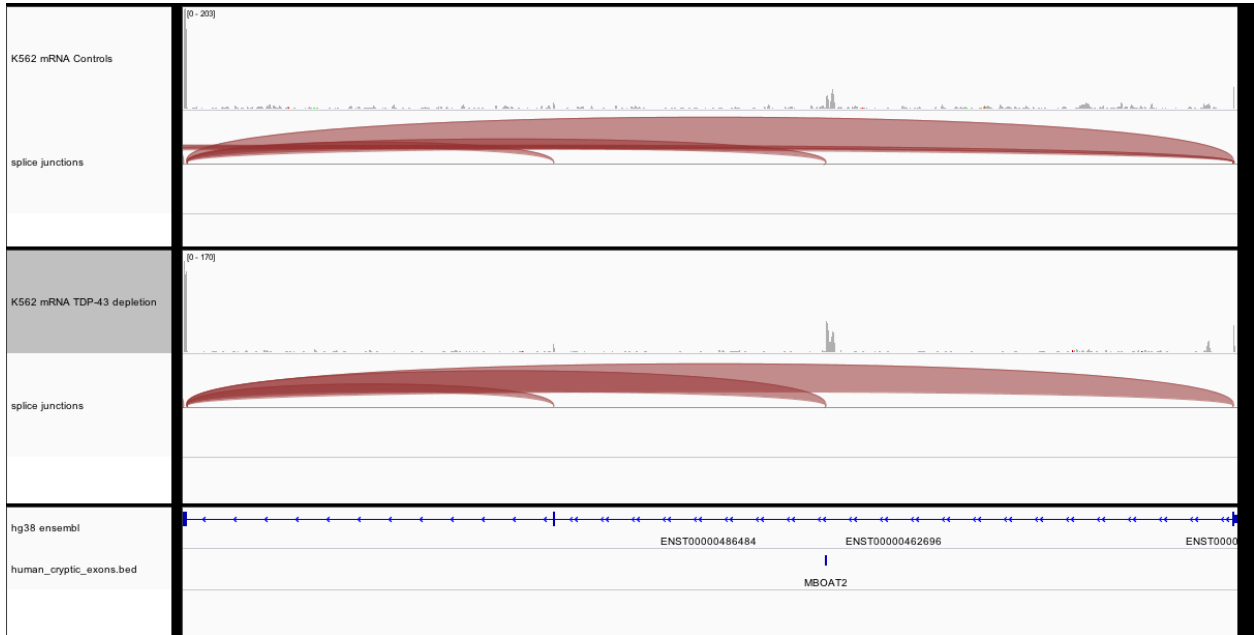

Human K562 total RNA

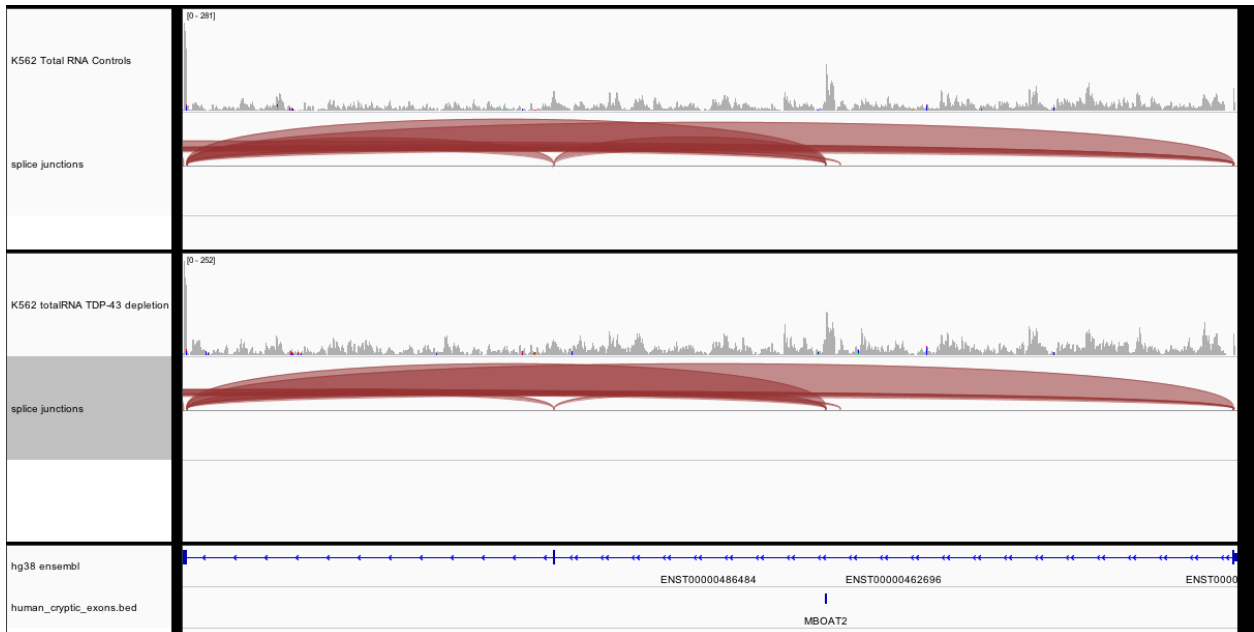

# 38 DNAAF5 E024i1

## Human K562 mRNA

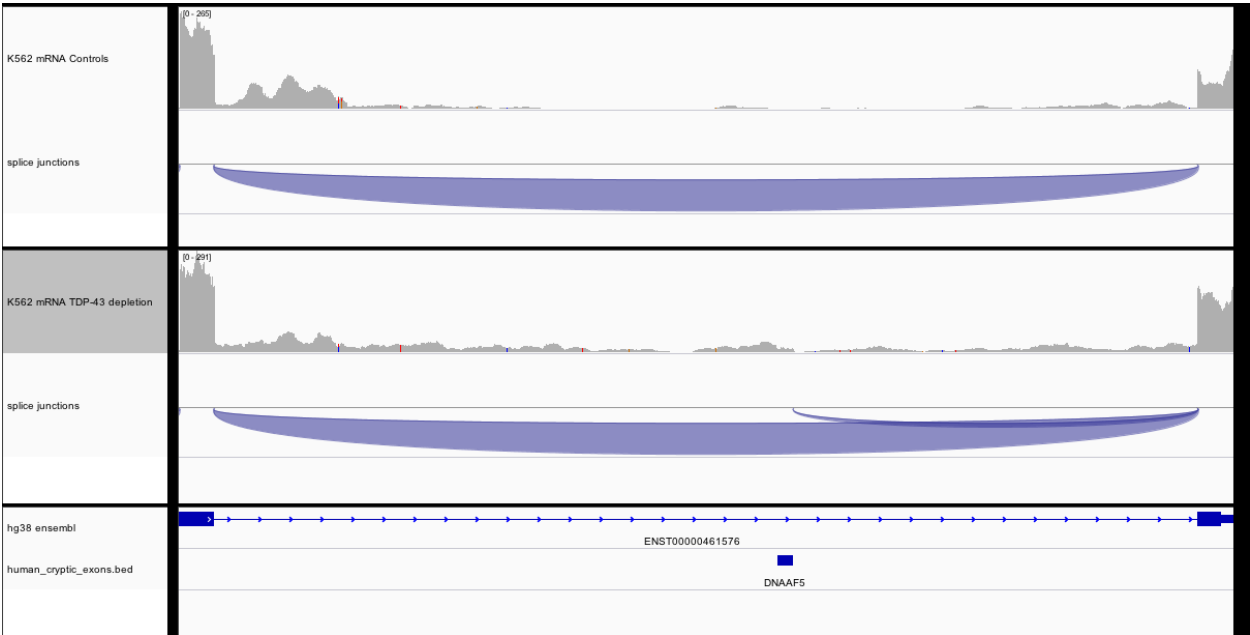

## Human K562 total RNA

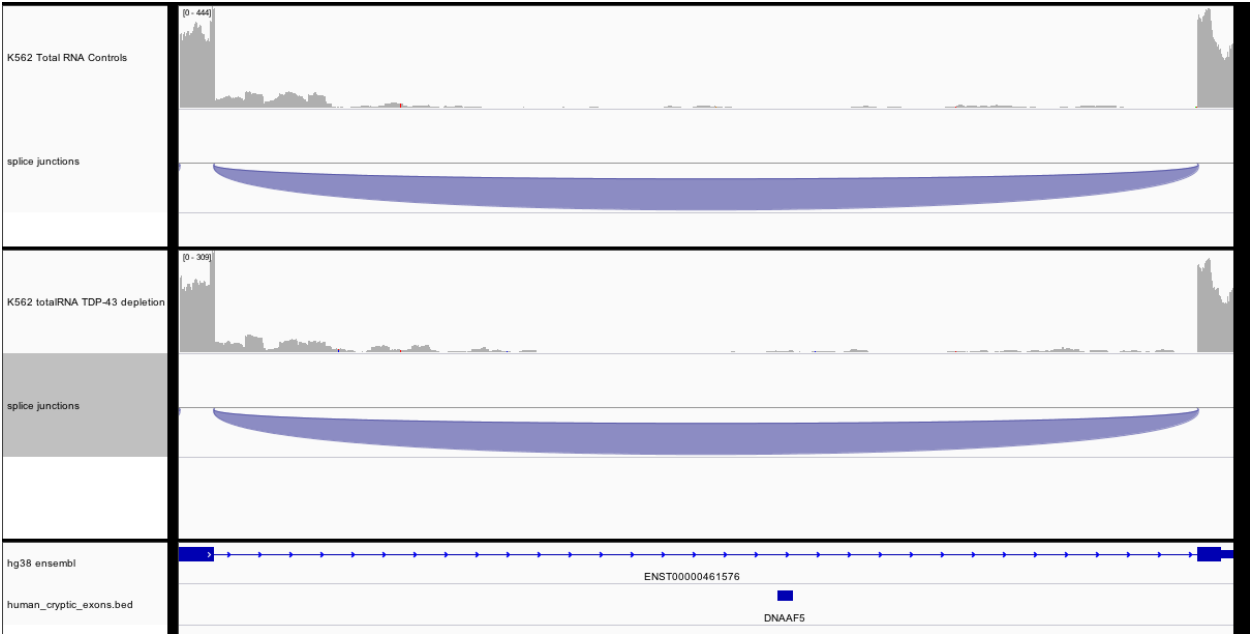

# 39 CLASP1 E012i1

Human K562 mRNA

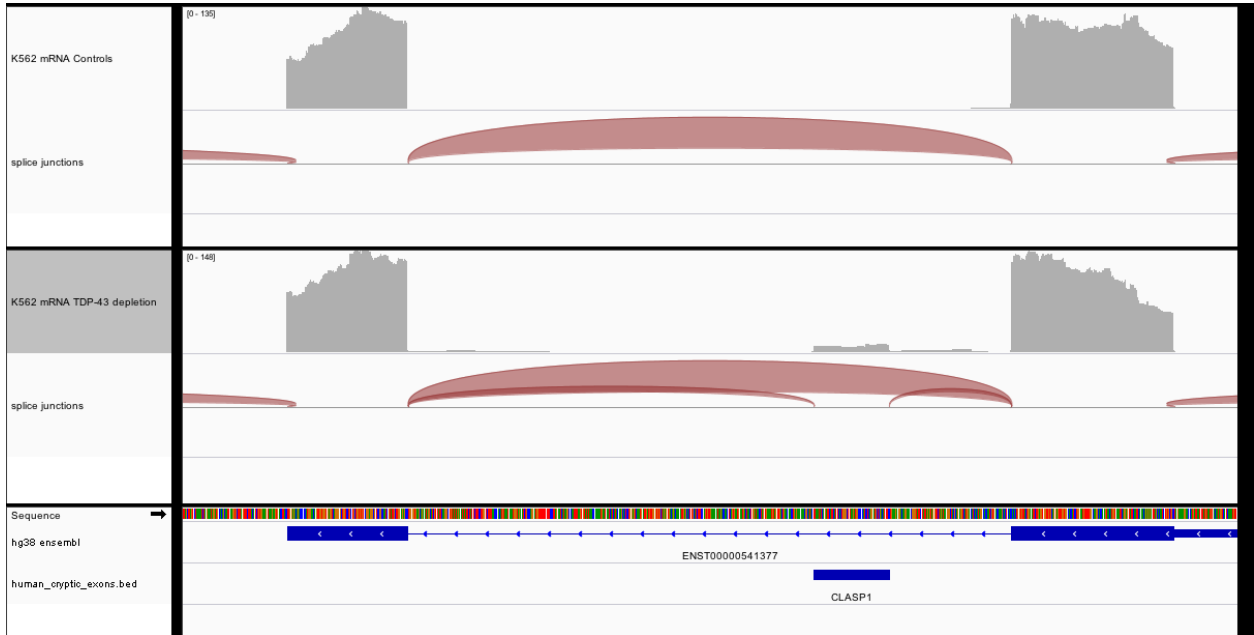

Human K562 total RNA

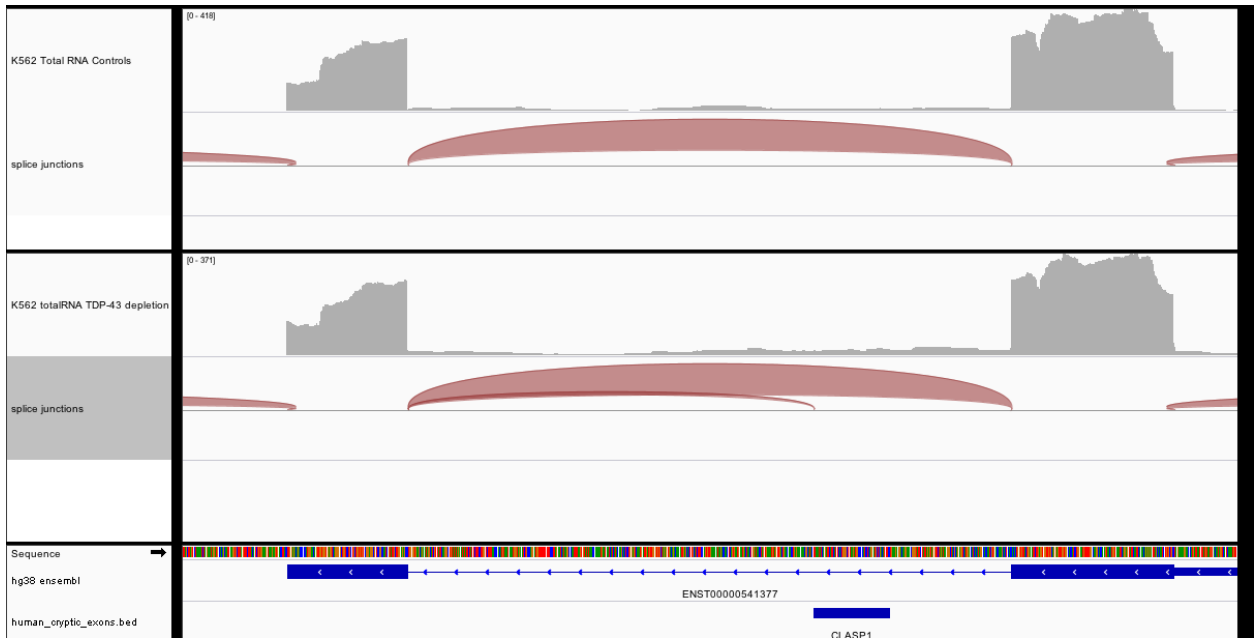



# 40 ZFP91+ZFP91-CNTF E012i1

## Human K562 mRNA

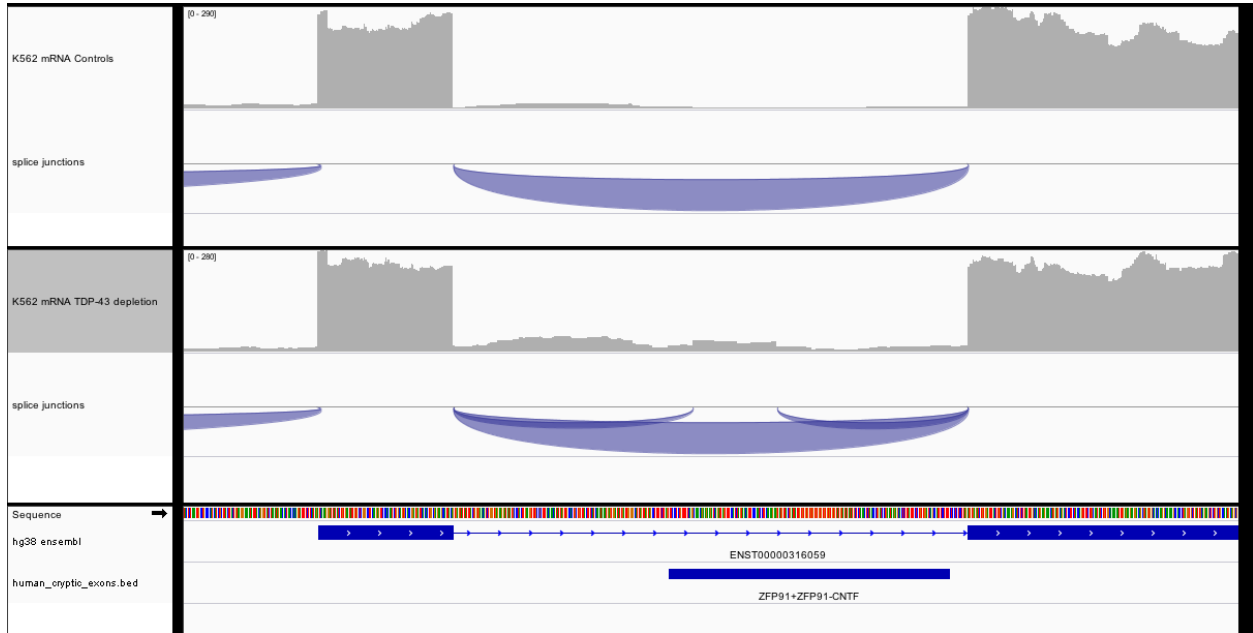

## Human K562 total RNA

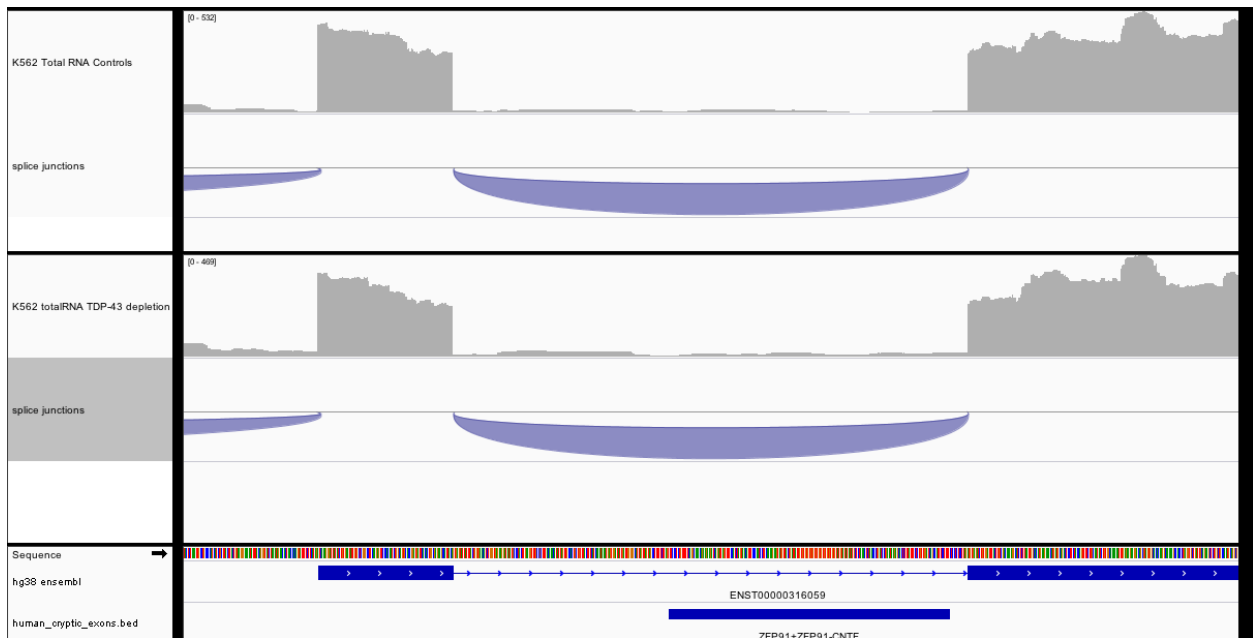

# 41 FAM178B E017i1

Human K562 mRNA

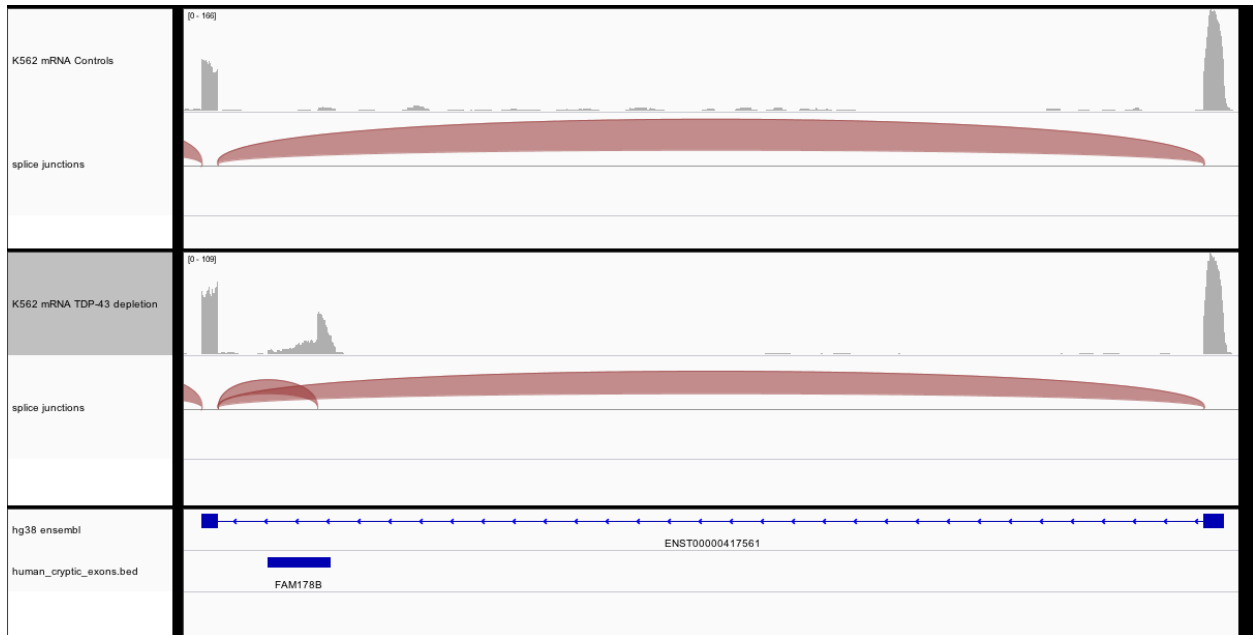

Human K562 total RNA

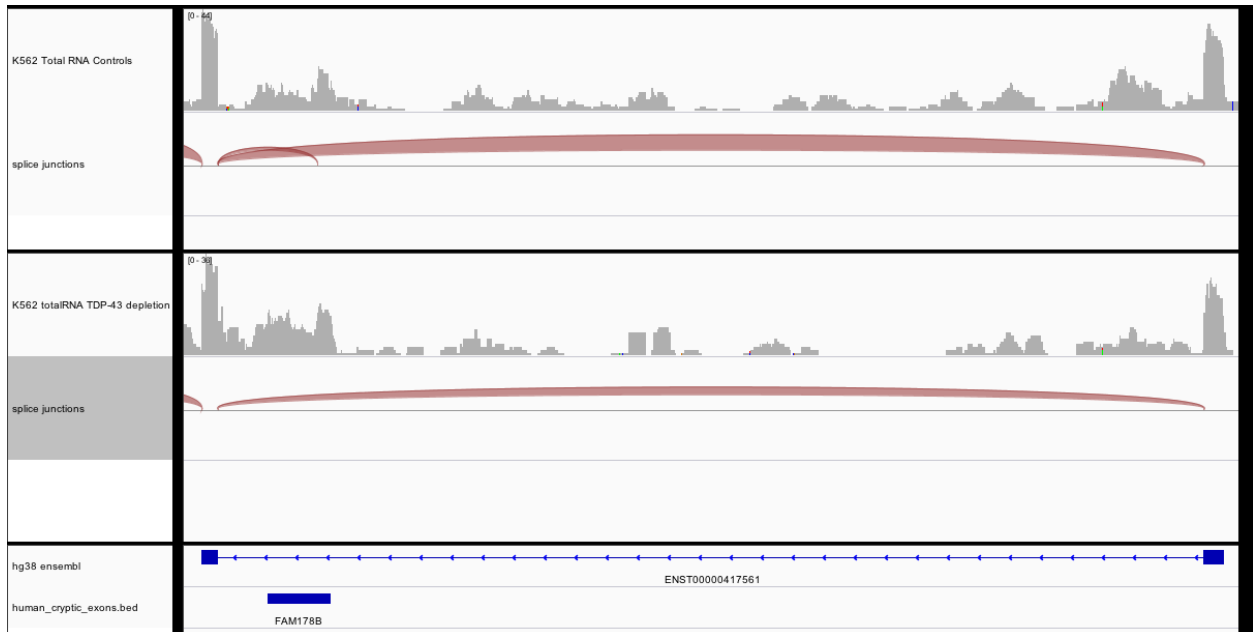

# 42 ANAPC1 E020i1

## Human K562 mRNA

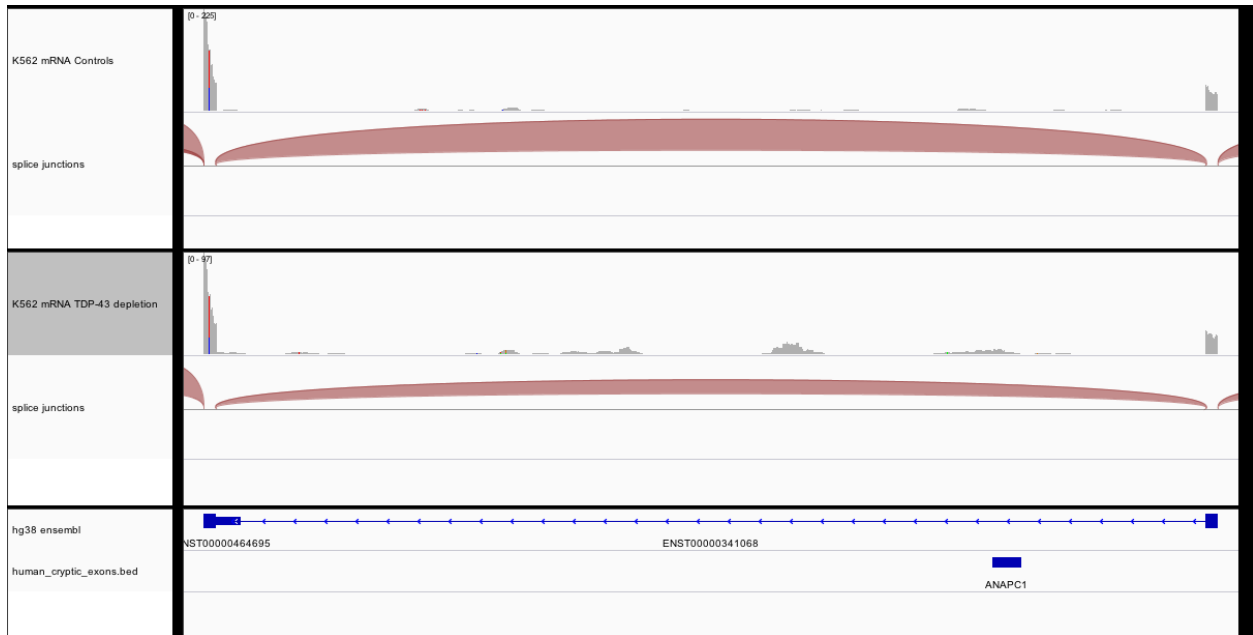

## Human K562 total RNA

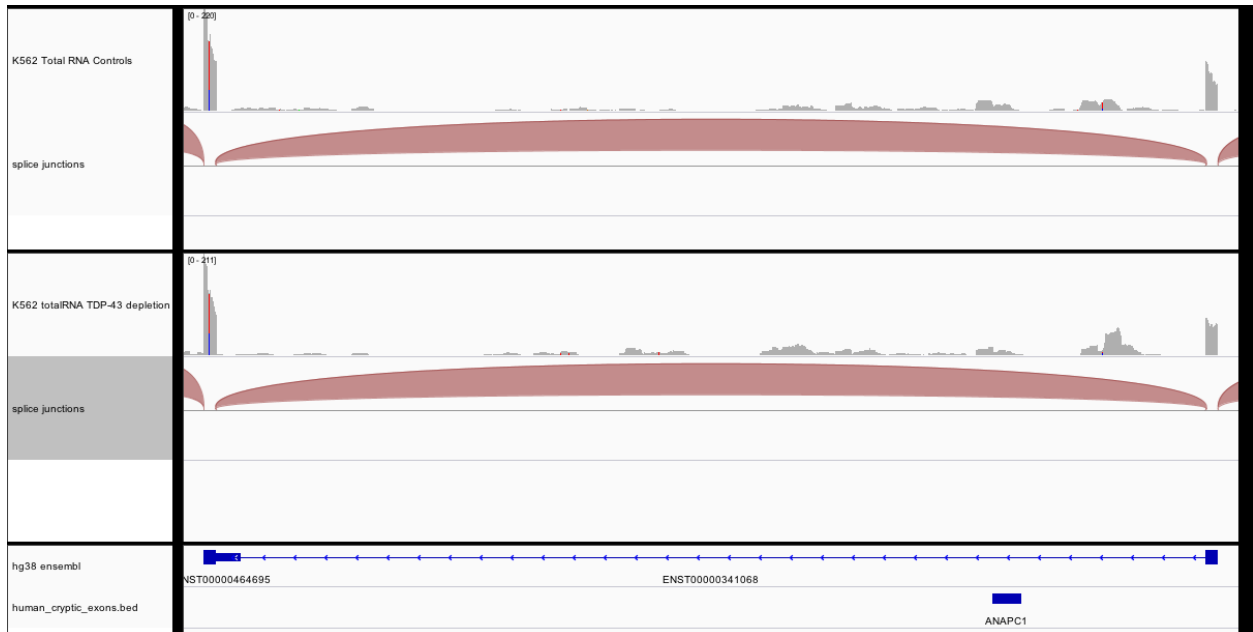

# 43 CERK E005i1

## Human K562 mRNA

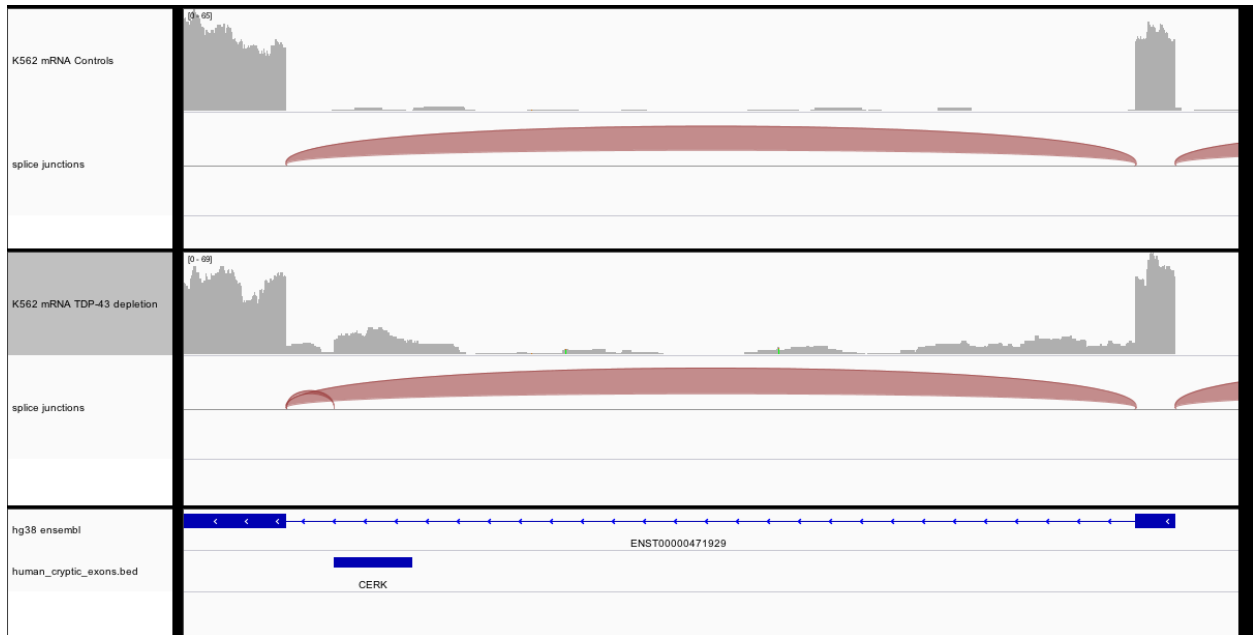

## Human K562 total RNA

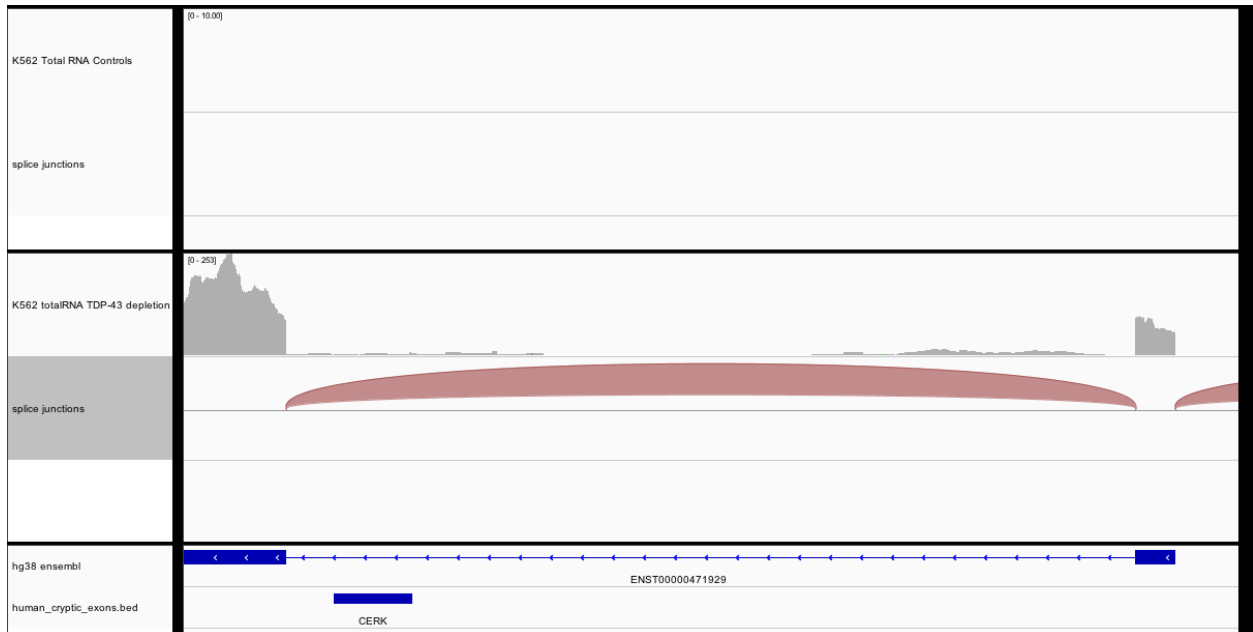

# 44 ARHGAP11B E033i1

## Human K562 mRNA

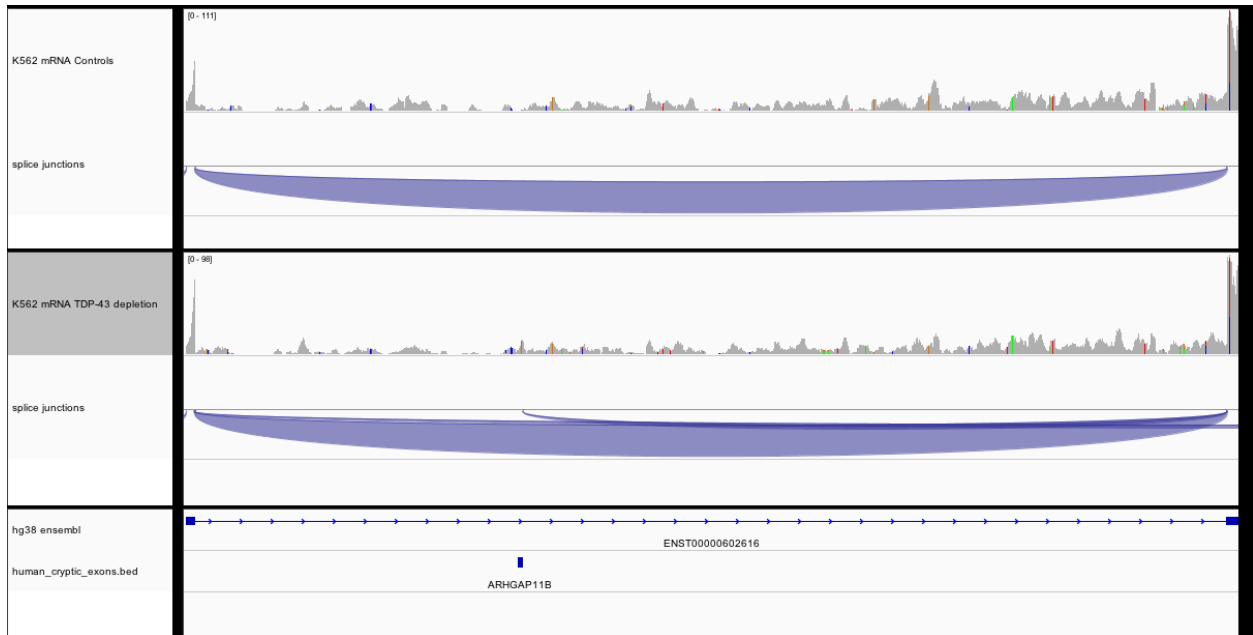

## Human K562 total RNA

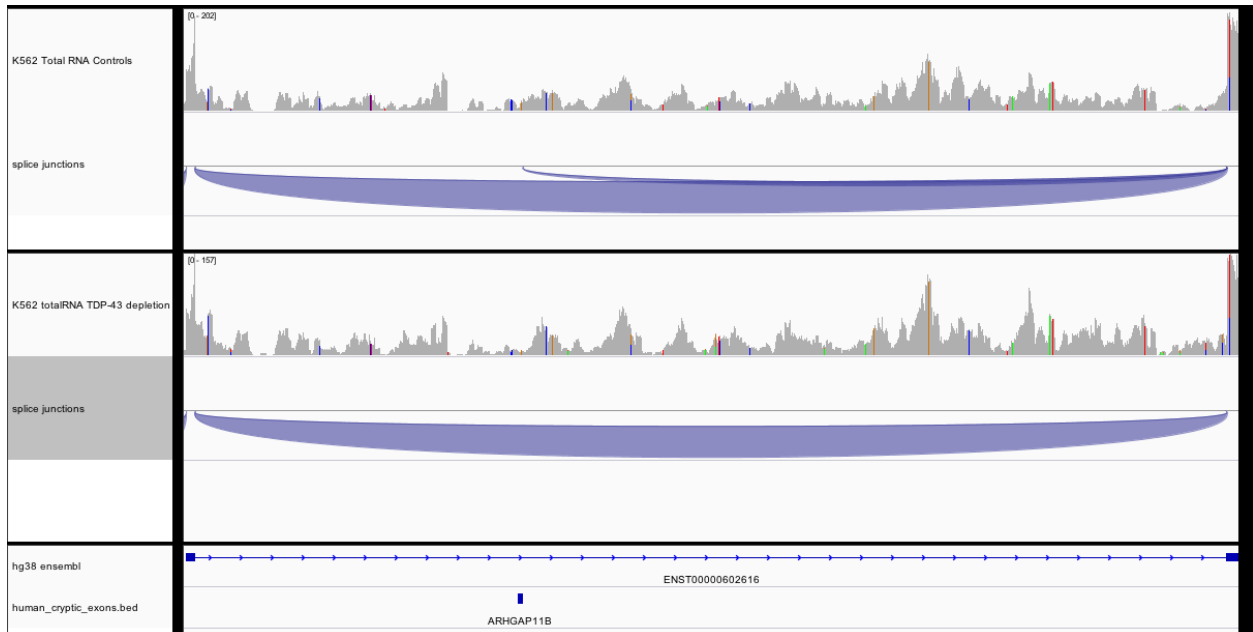

# 45 GOLGA8A E037i1

Human K562 mRNA

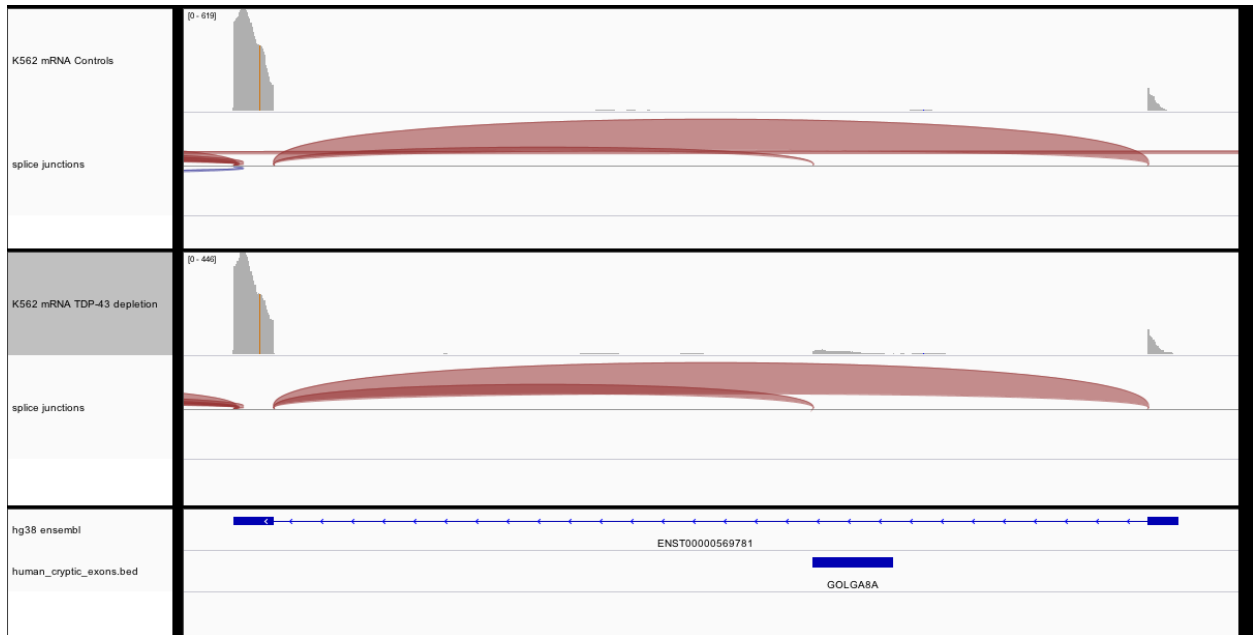

Human K562 total RNA

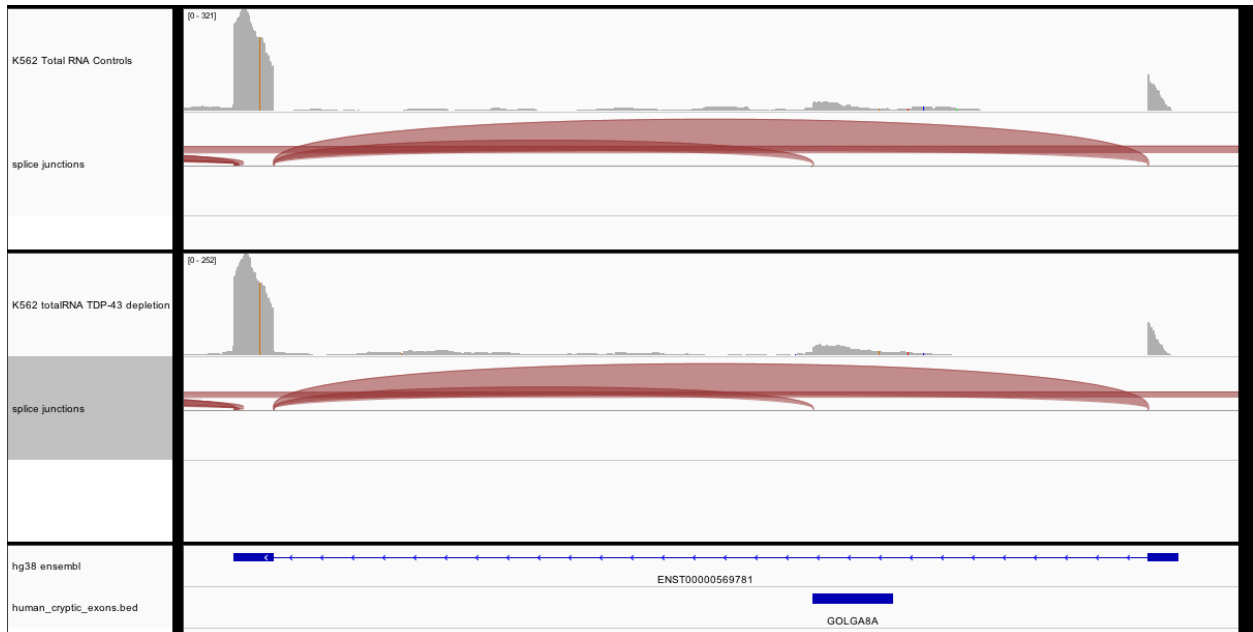

# 46 TGFBRAP1 E014i2

## Human K562 mRNA

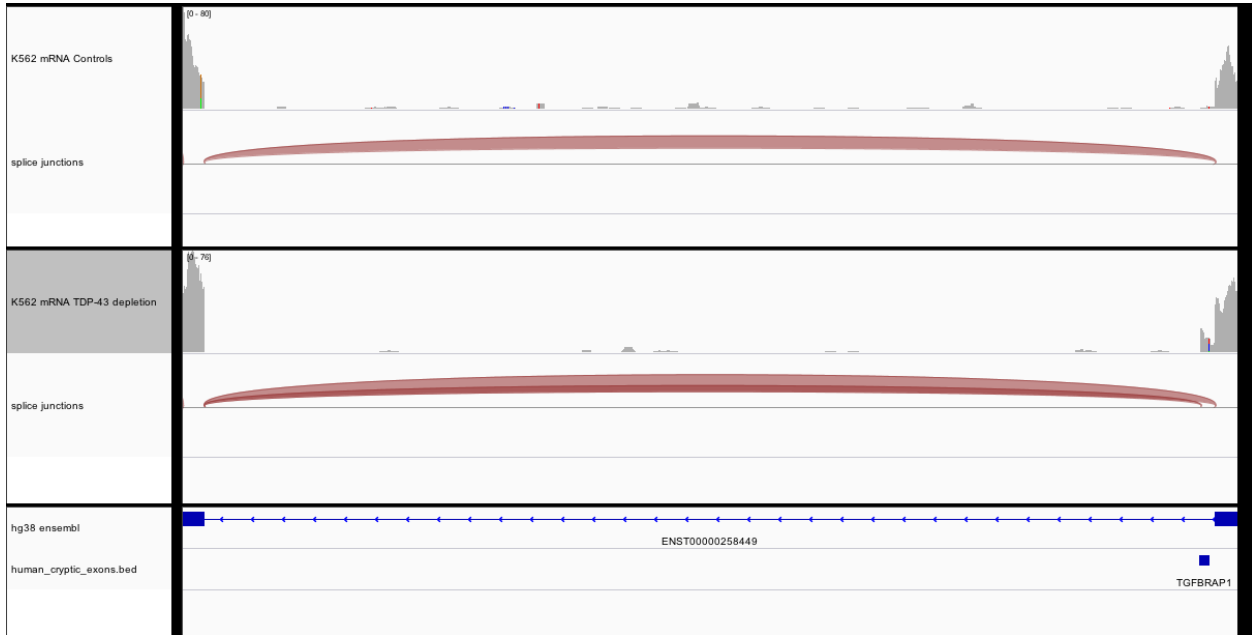

## Human K562 total RNA

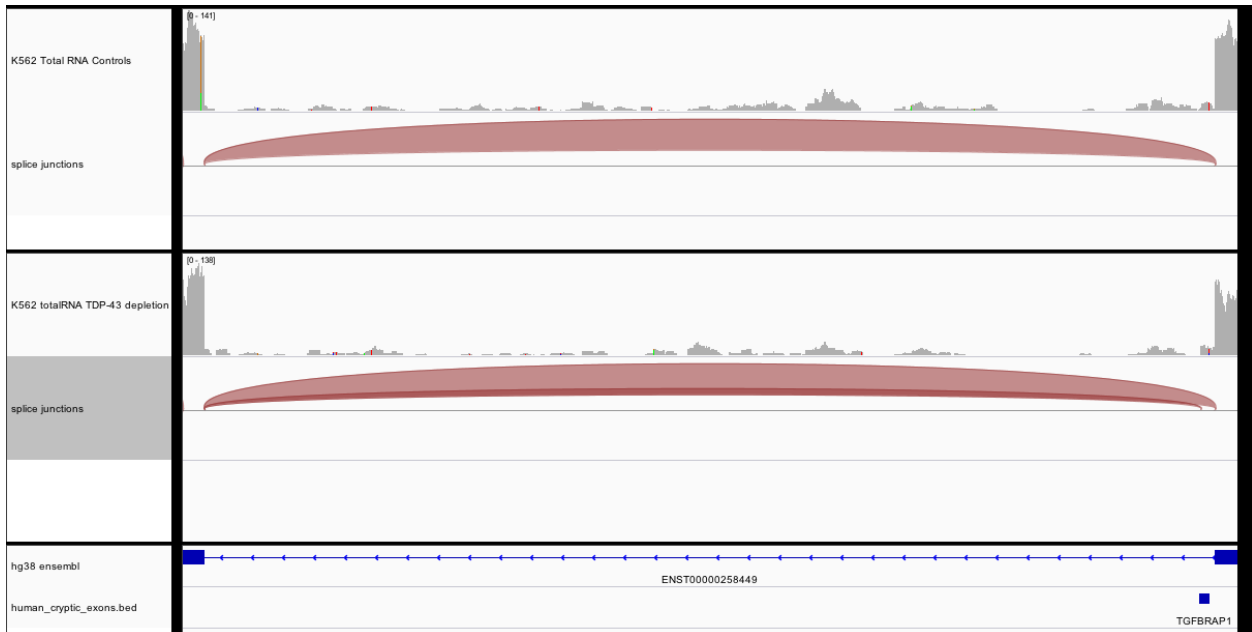

# 47 CAMK2G E039i1

Human K562 mRNA

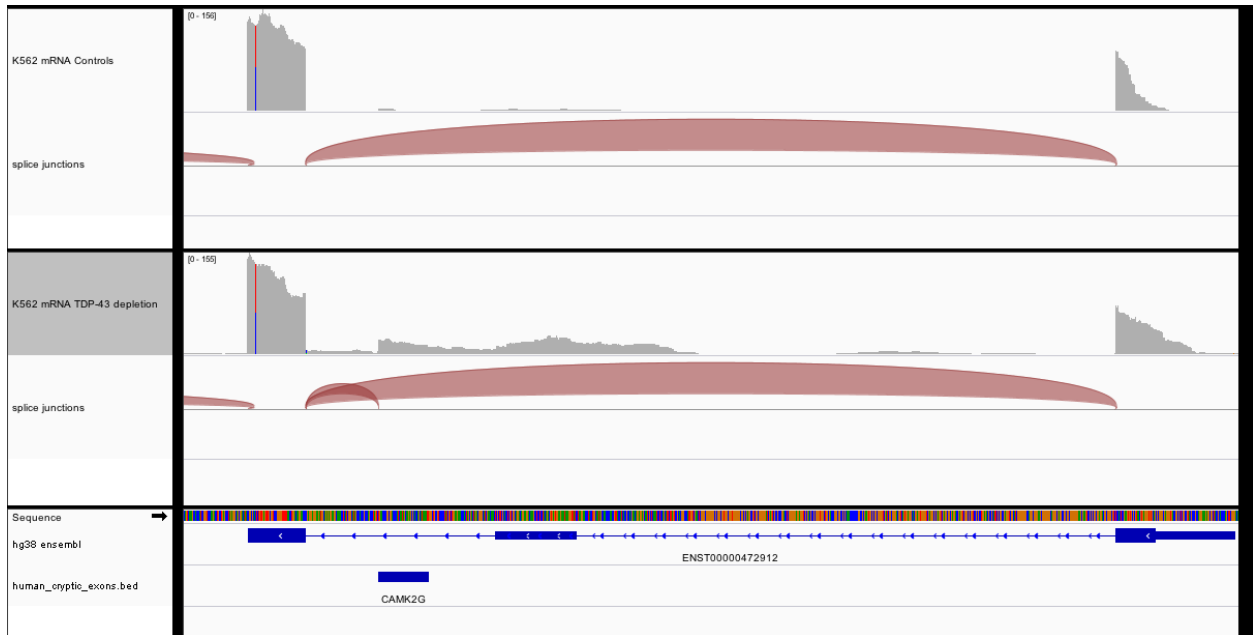

Human K562 total RNA

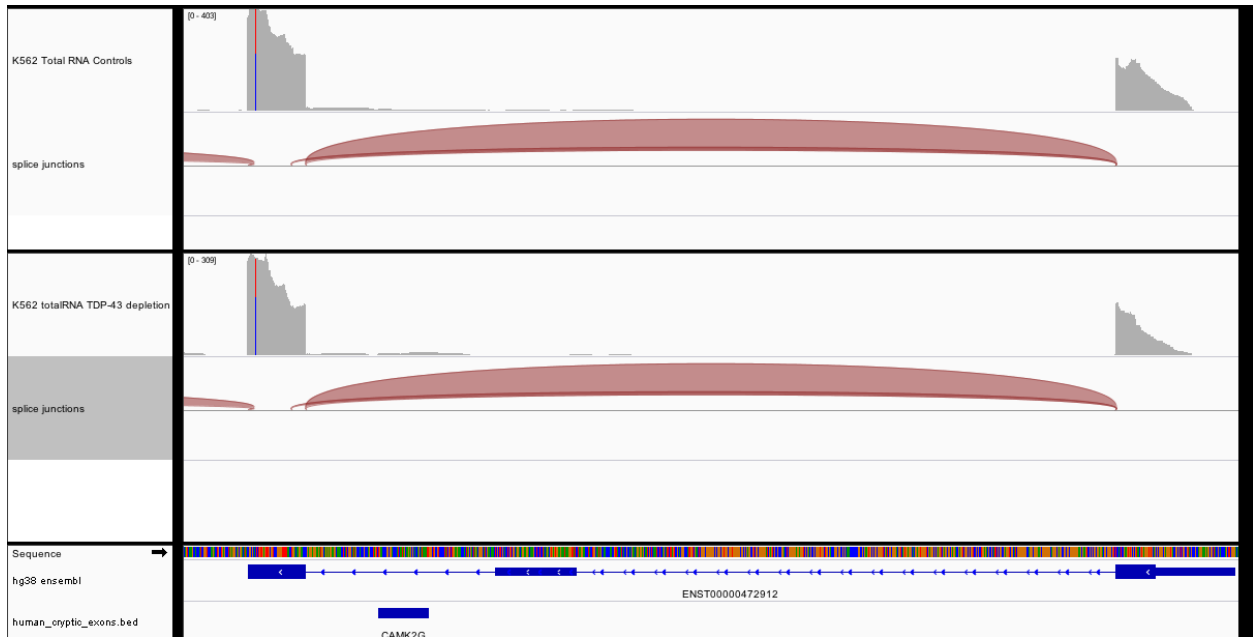



# 48 DCAF17 E008i1

## Human K562 mRNA

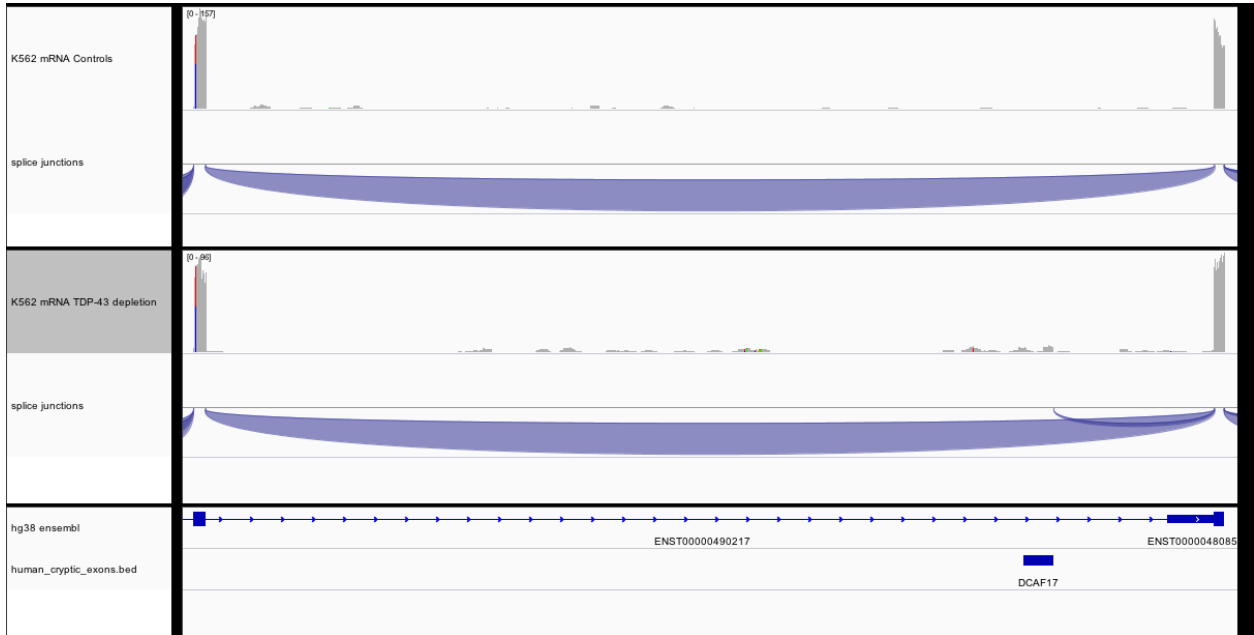

## Human K562 total RNA

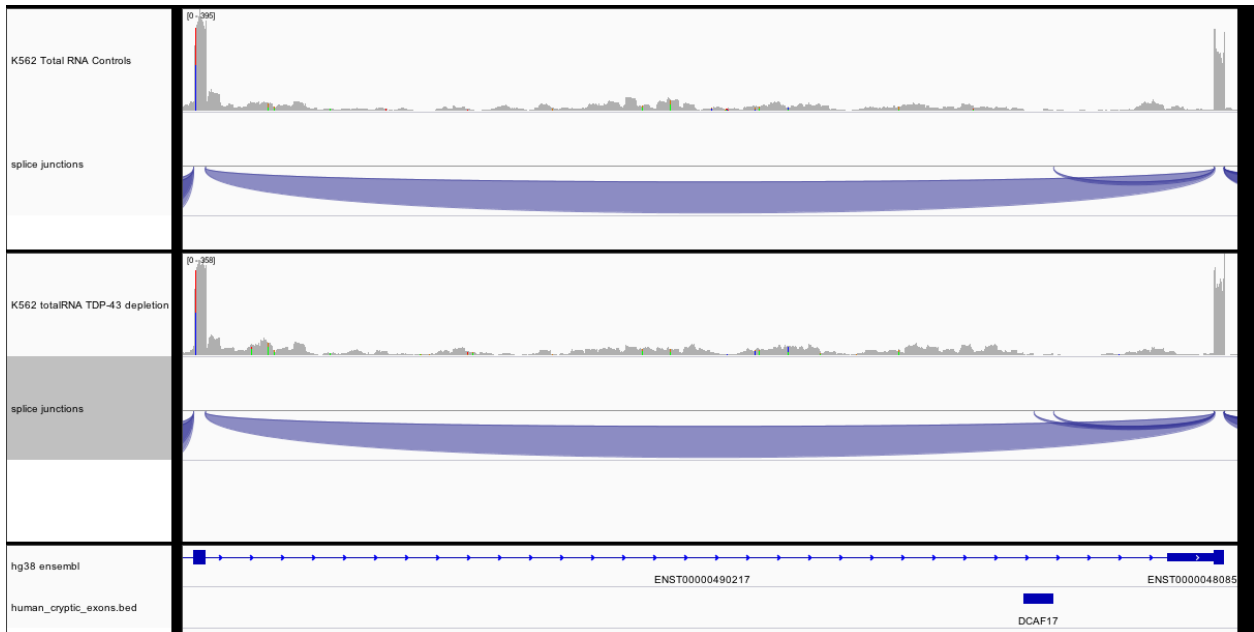

# 49 RP1-179N16-6 E002i2

## Human K562 mRNA

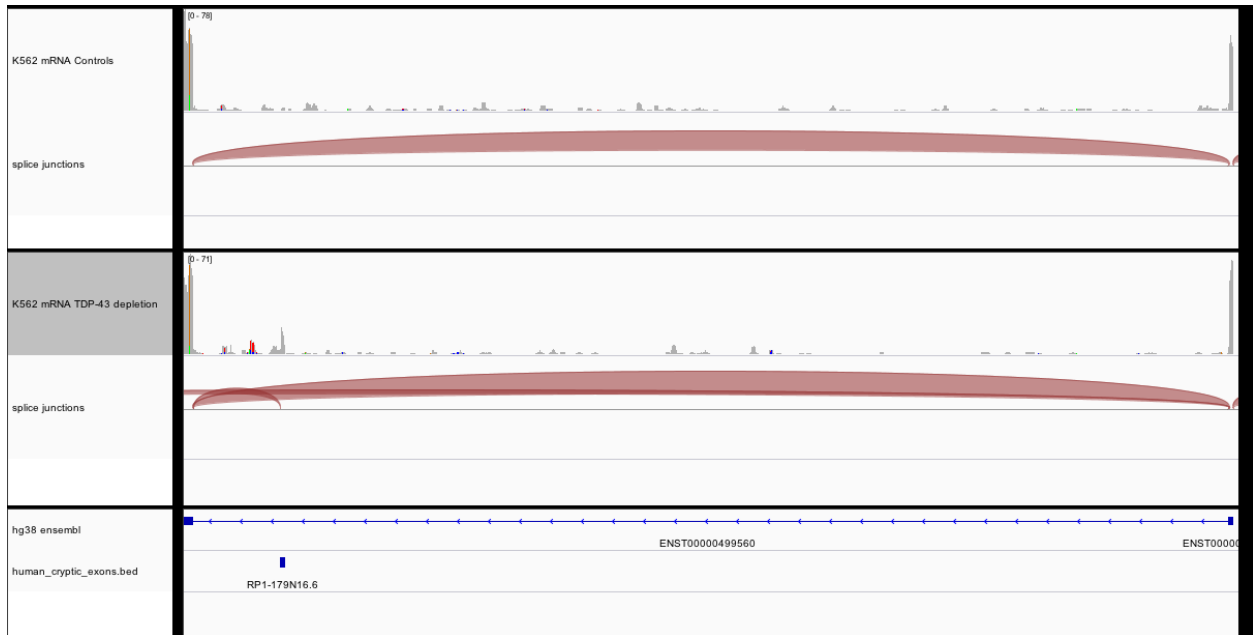

## Human K562 total RNA

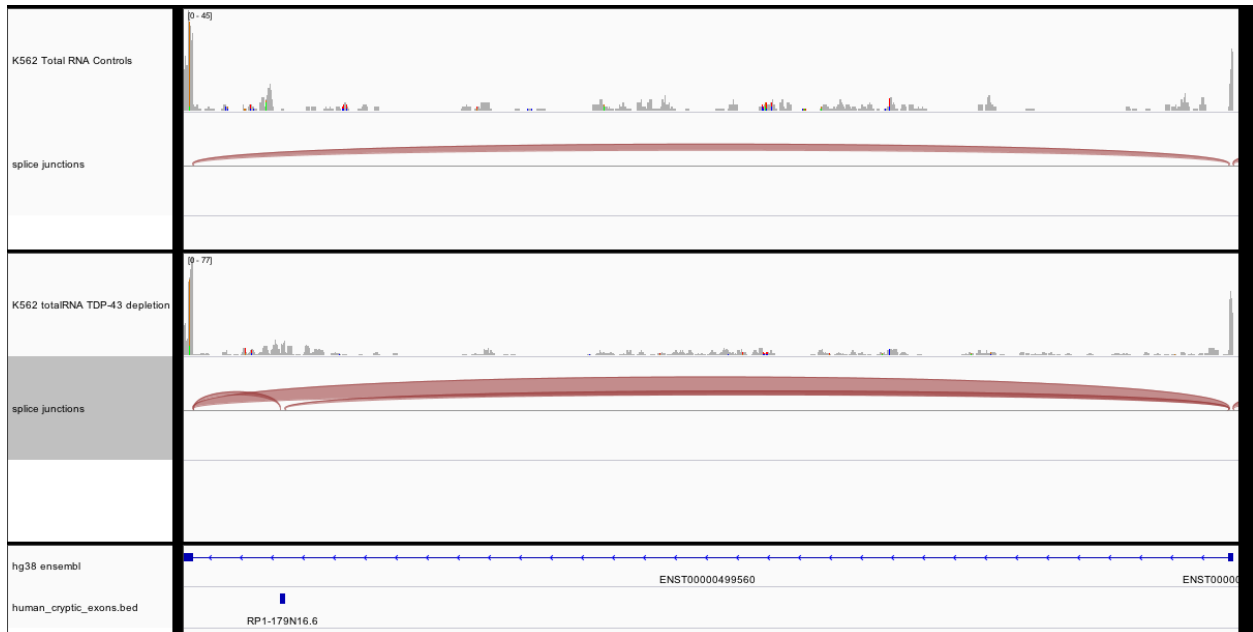

# 50 RNFT2 E016i2

## Human K562 mRNA

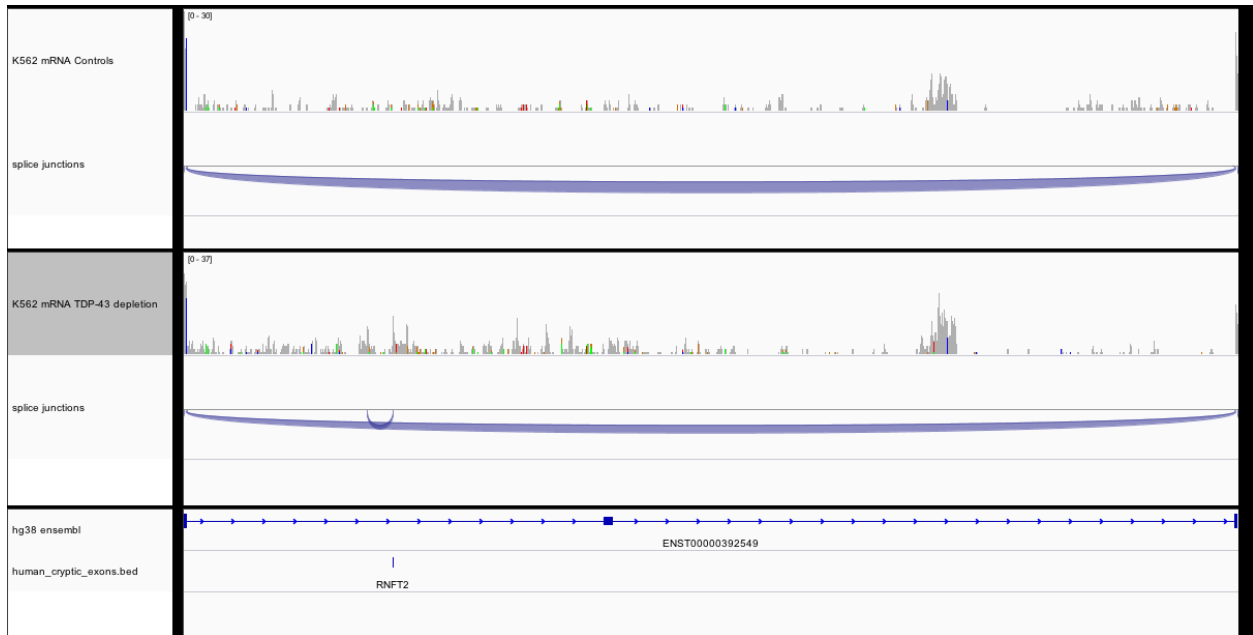

## Human K562 total RNA

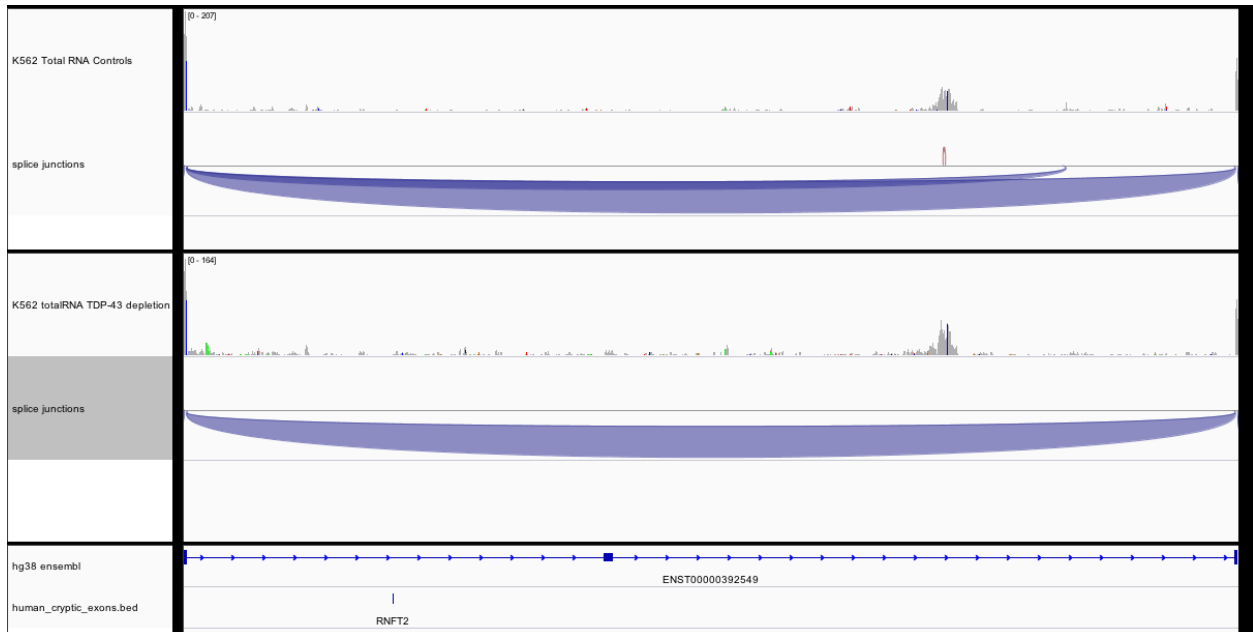

# 51 SH2B3 E005i1

## Human K562 mRNA

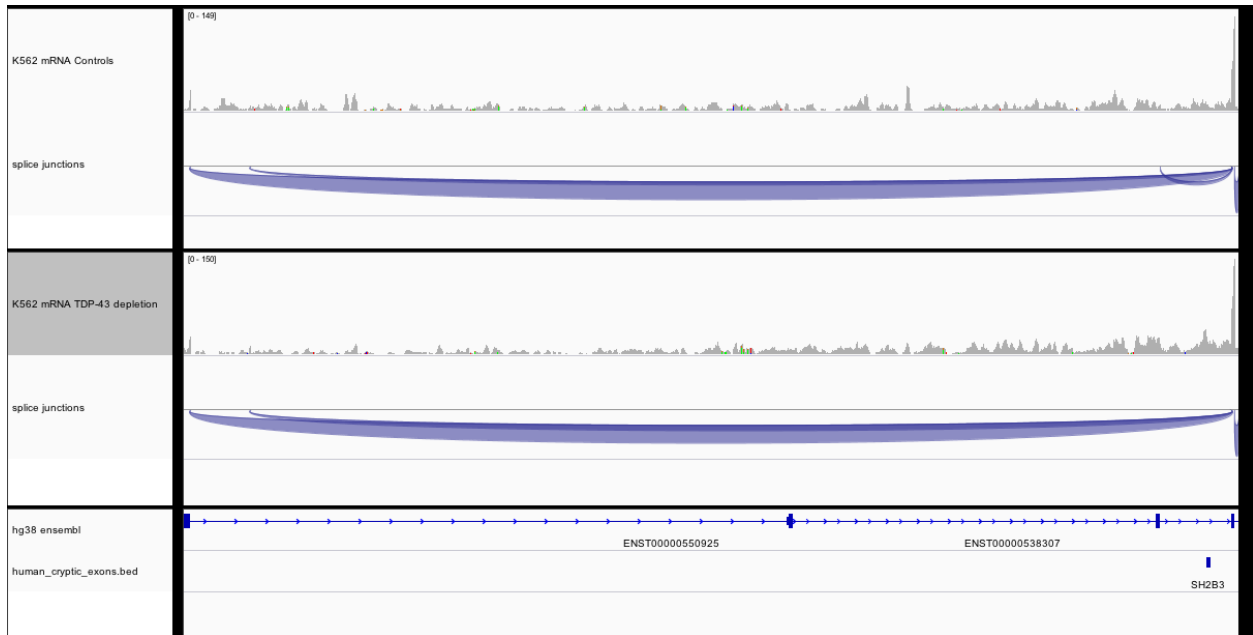

## Human K562 total RNA

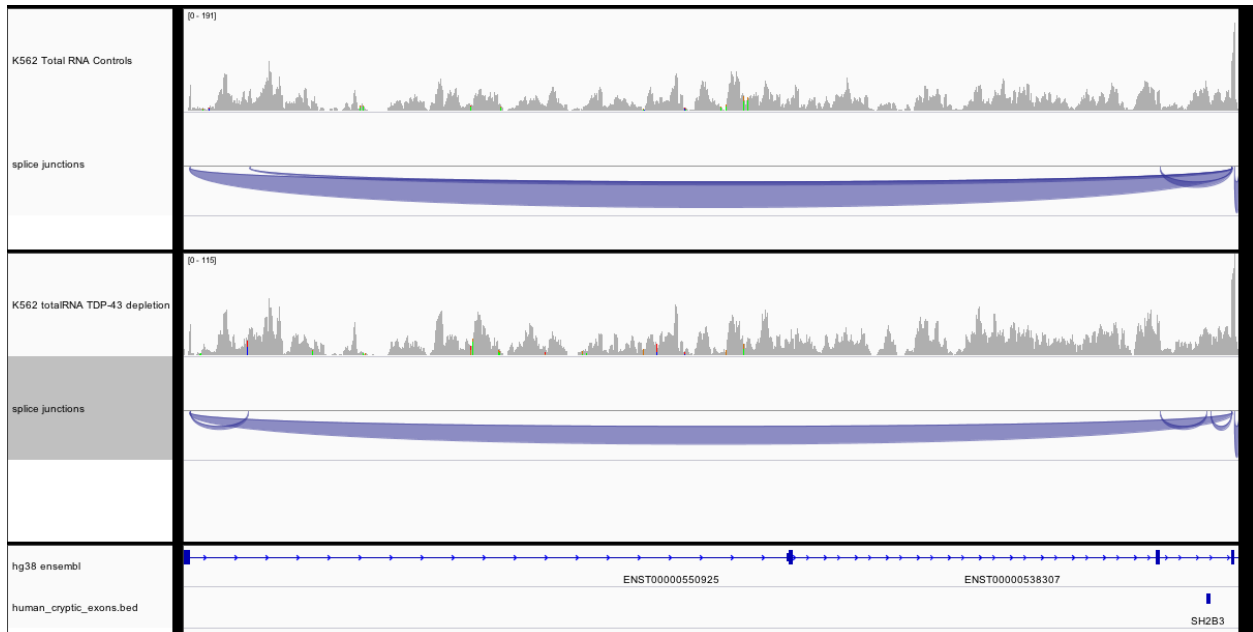

# 52 SENP7 E020i1

## Human K562 mRNA

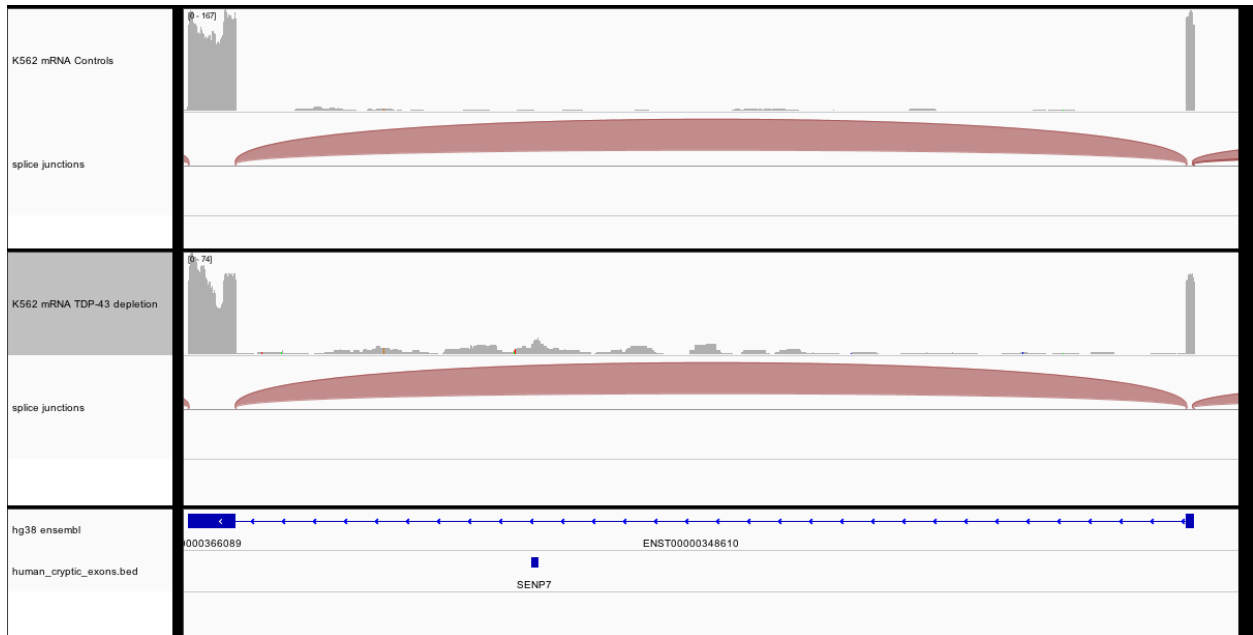

## Human K562 total RNA

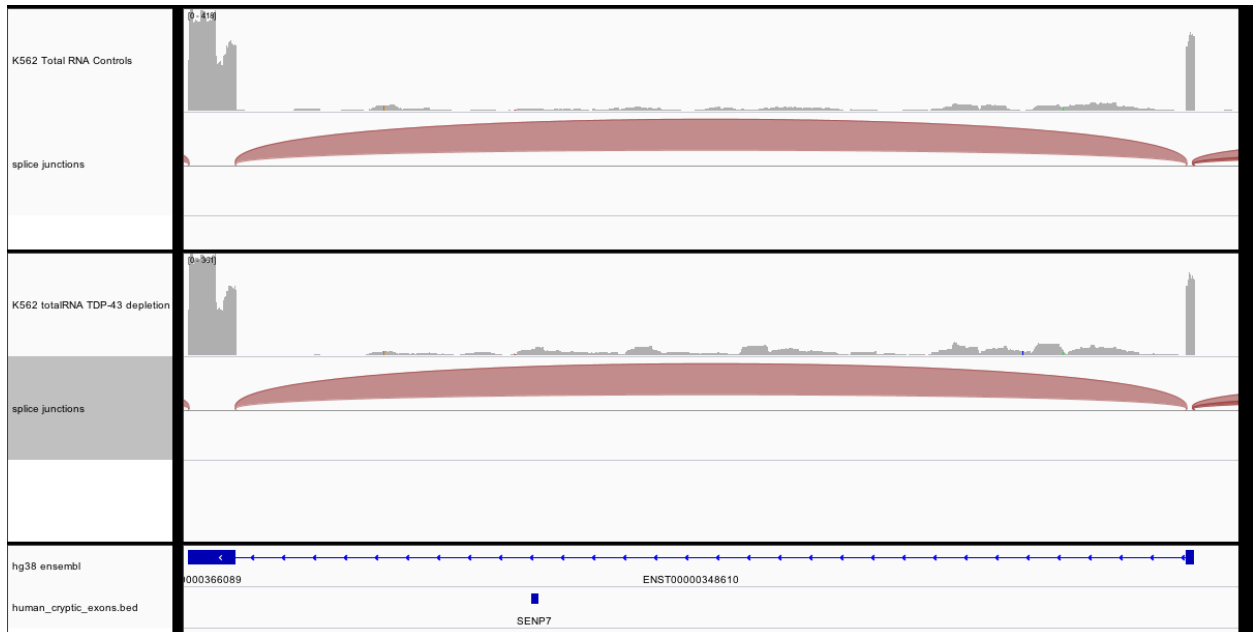

# 53 GOLGB1 E013i1

Human K562 mRNA

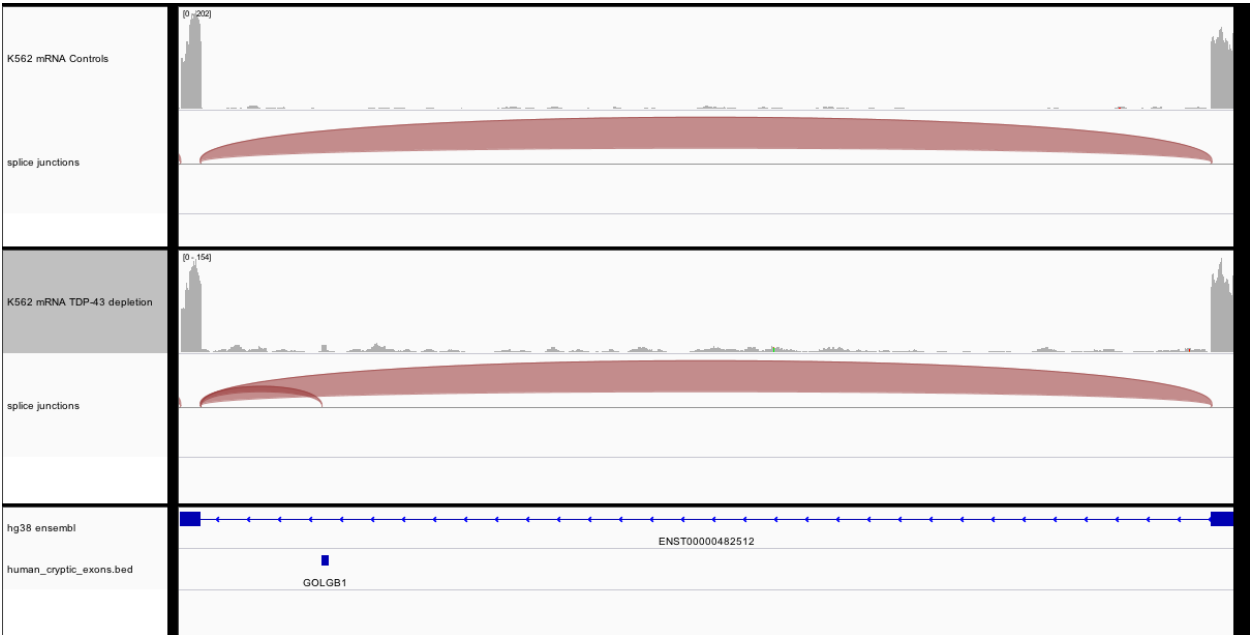

Human K562 total RNA

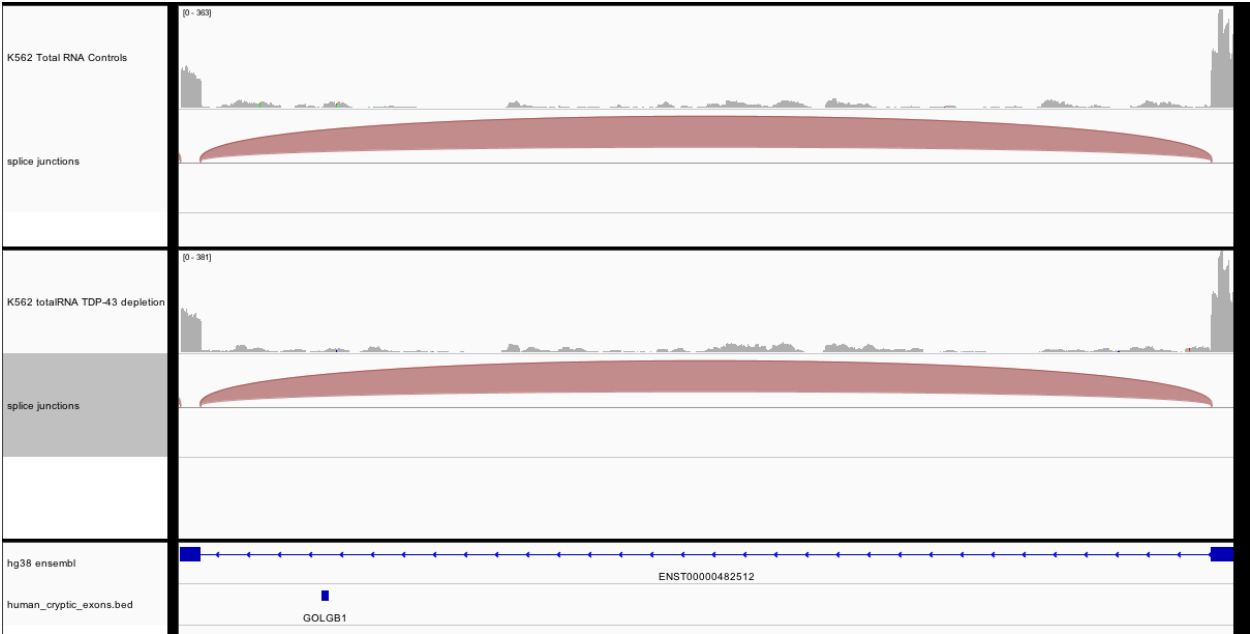

# 54 AGRN E015i1

## Human K562 mRNA

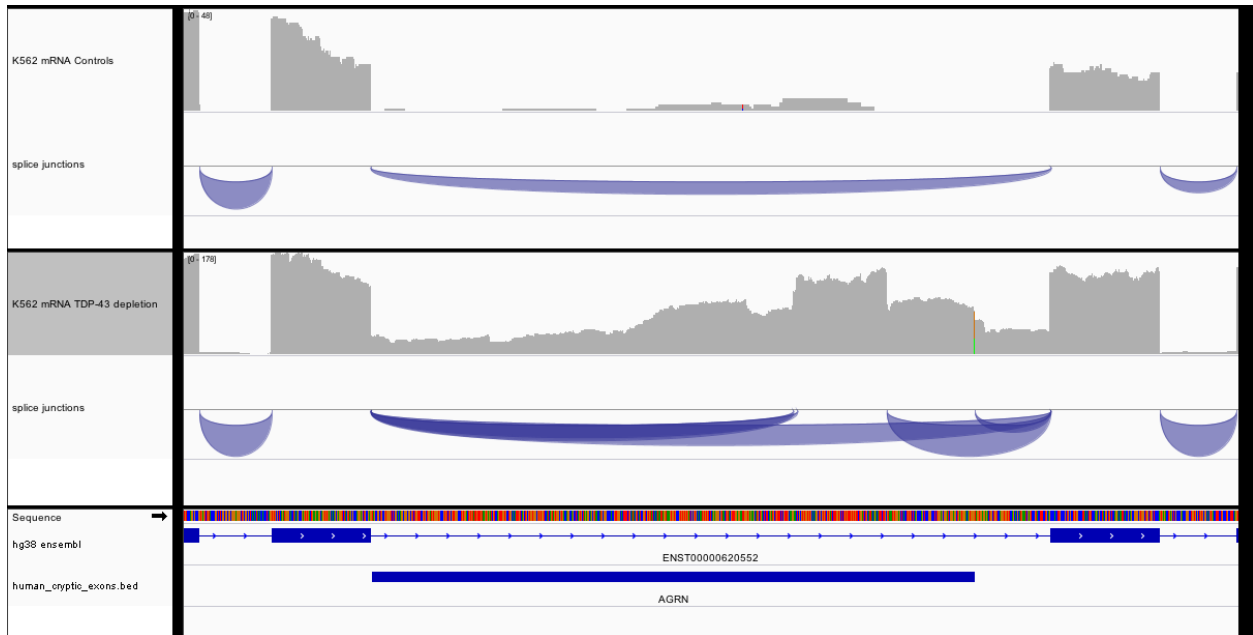

## Human K562 total RNA

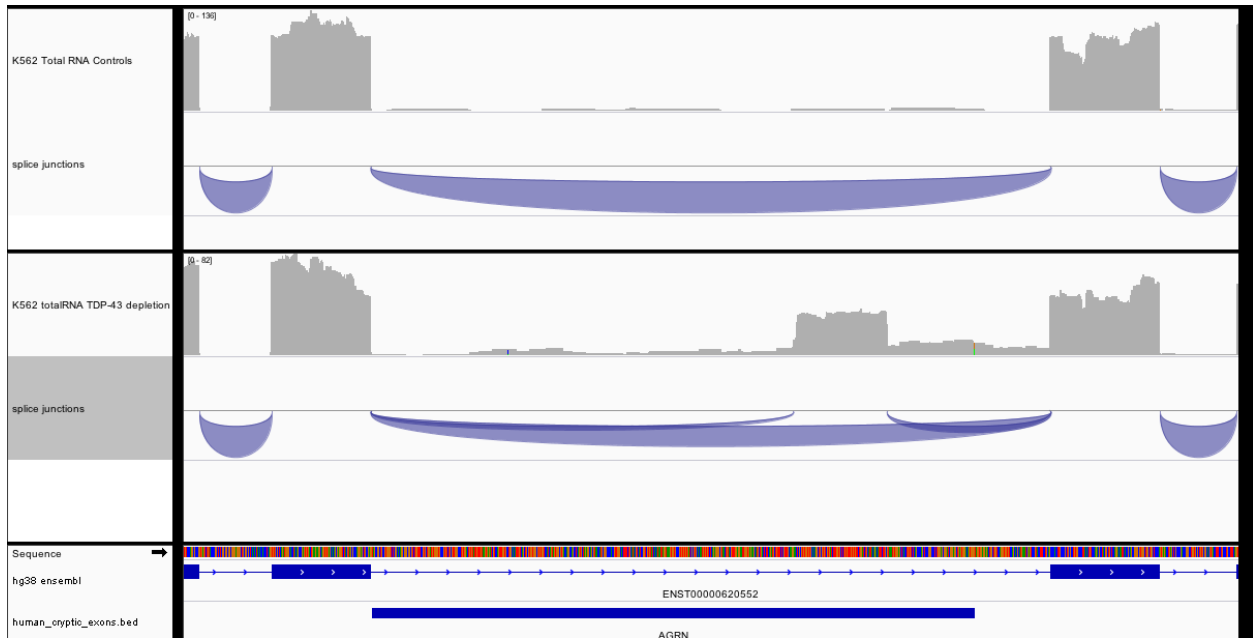

# 55 CEP72 E012i1

## Human K562 mRNA

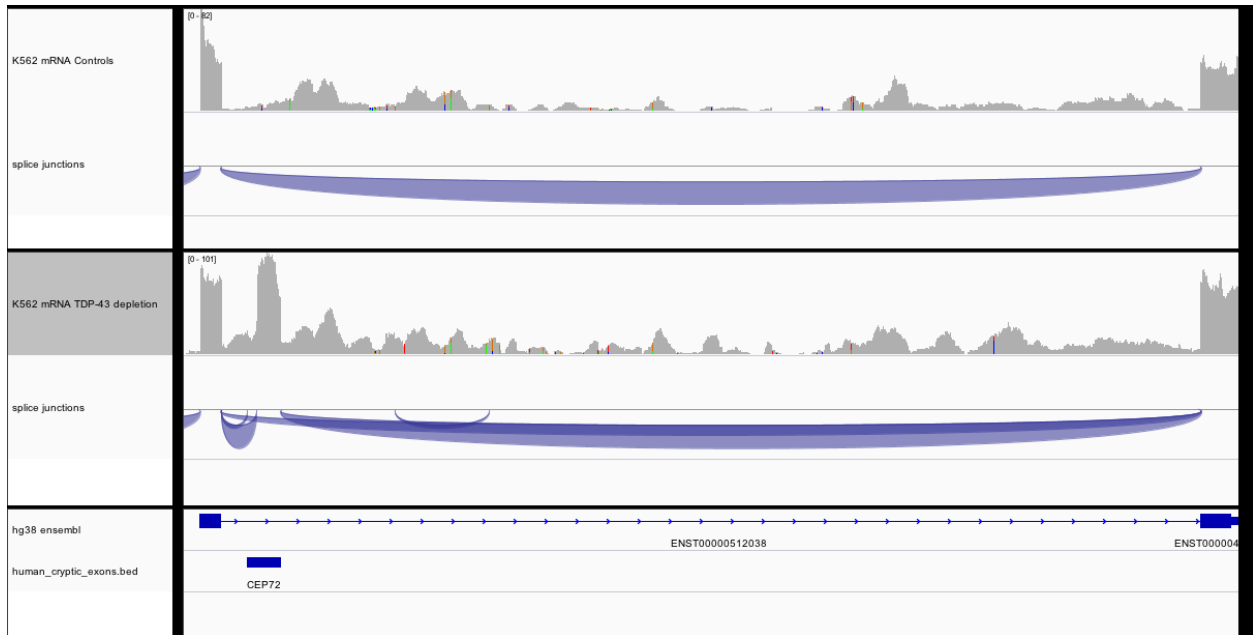

## Human K562 total RNA

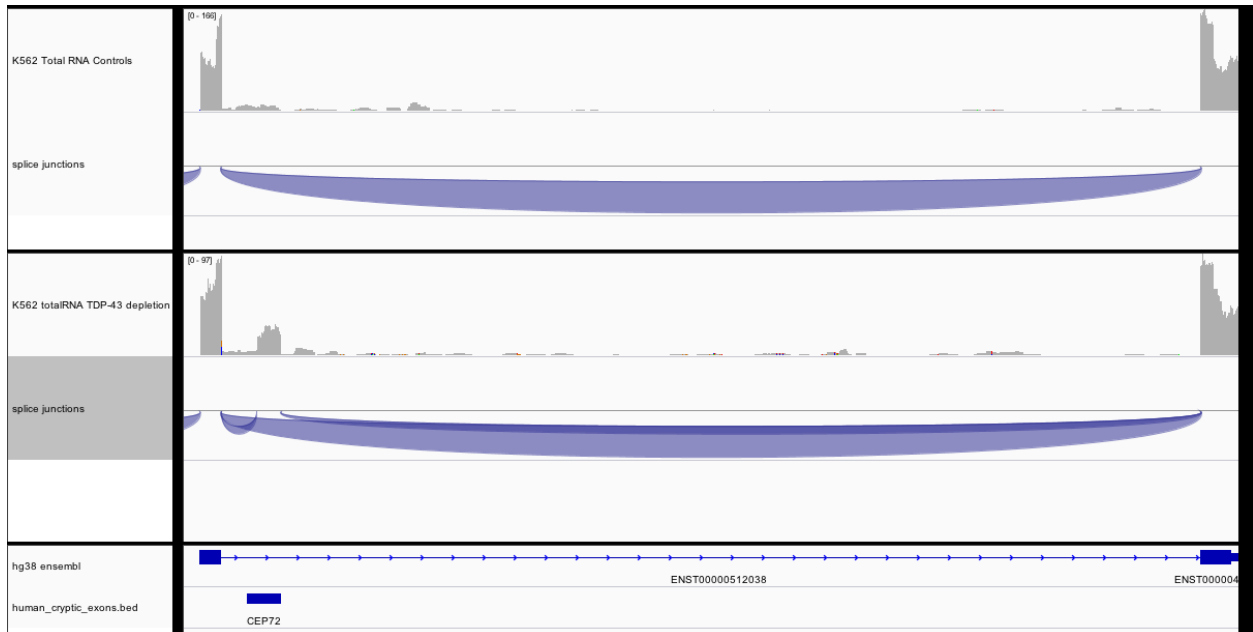



# 56 RAP1GAP E010i1

Human K562 mRNA

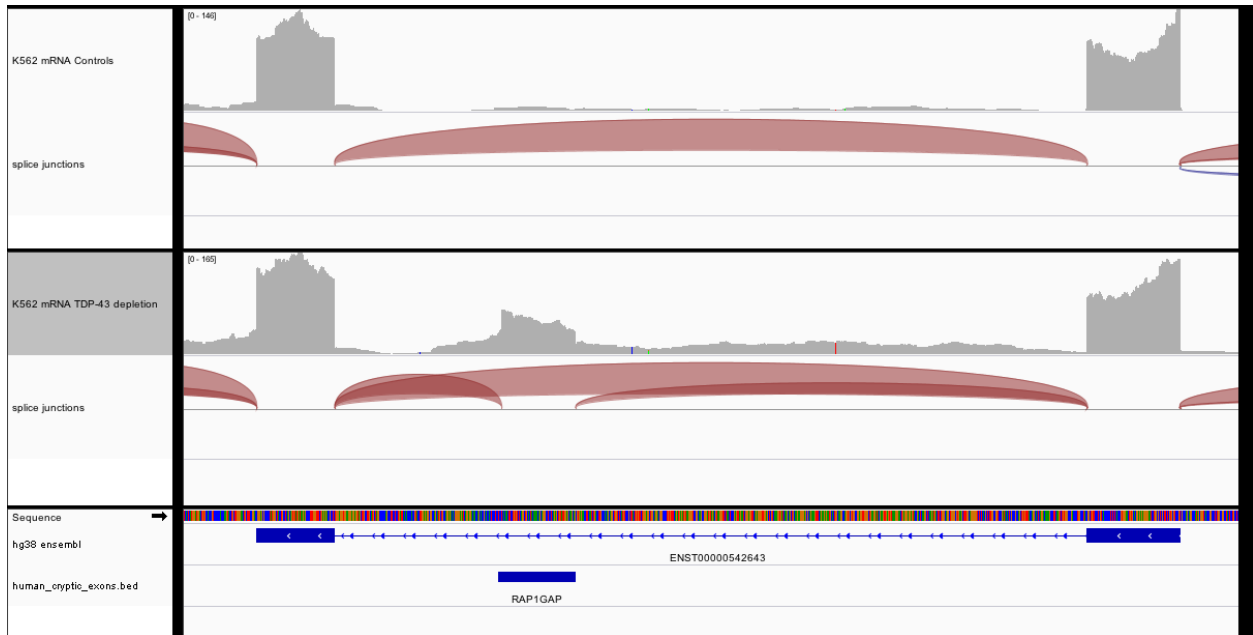

Human K562 total RNA

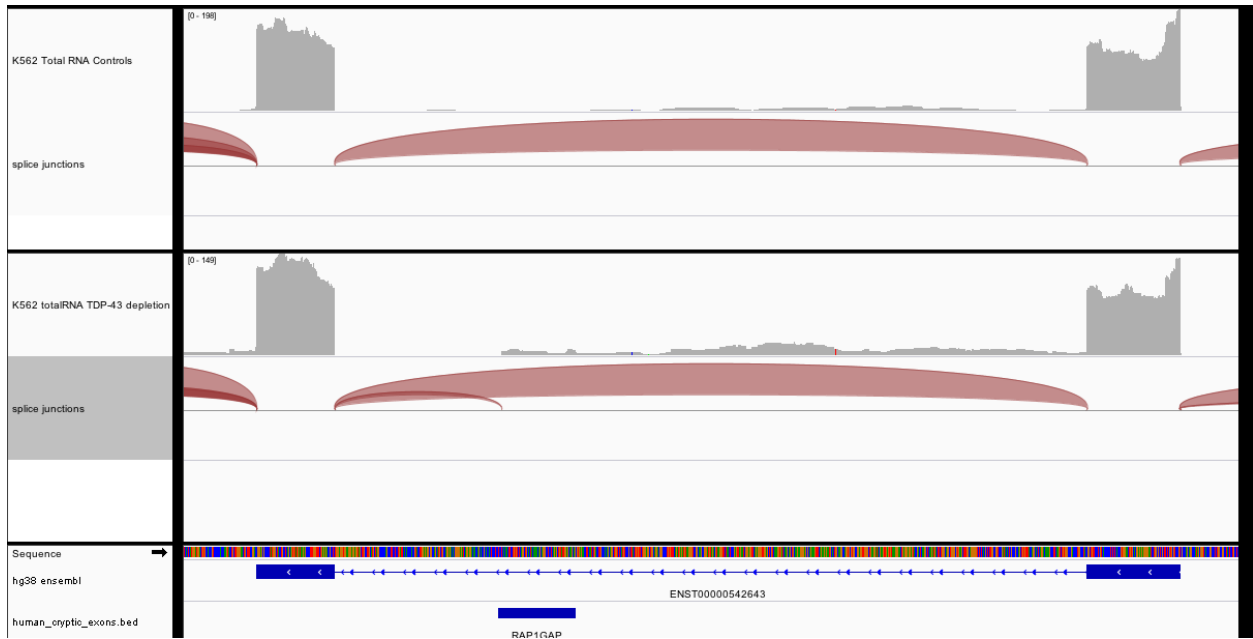

# 57 PFKP E010i1

## Human K562 mRNA

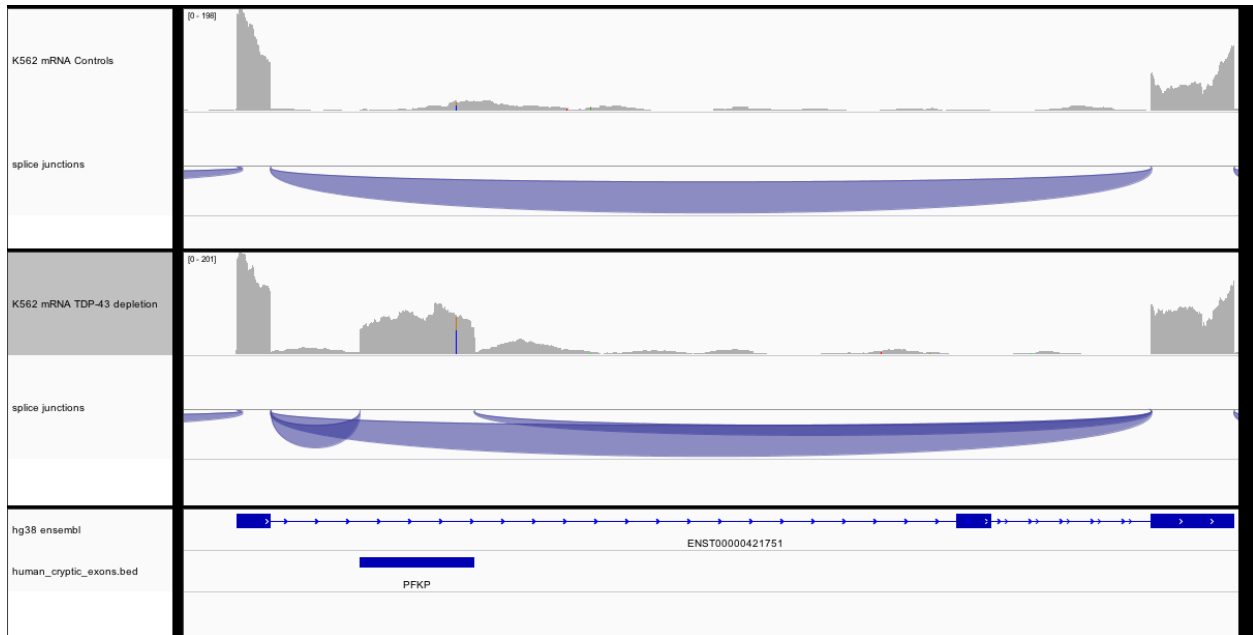

## Human K562 total RNA

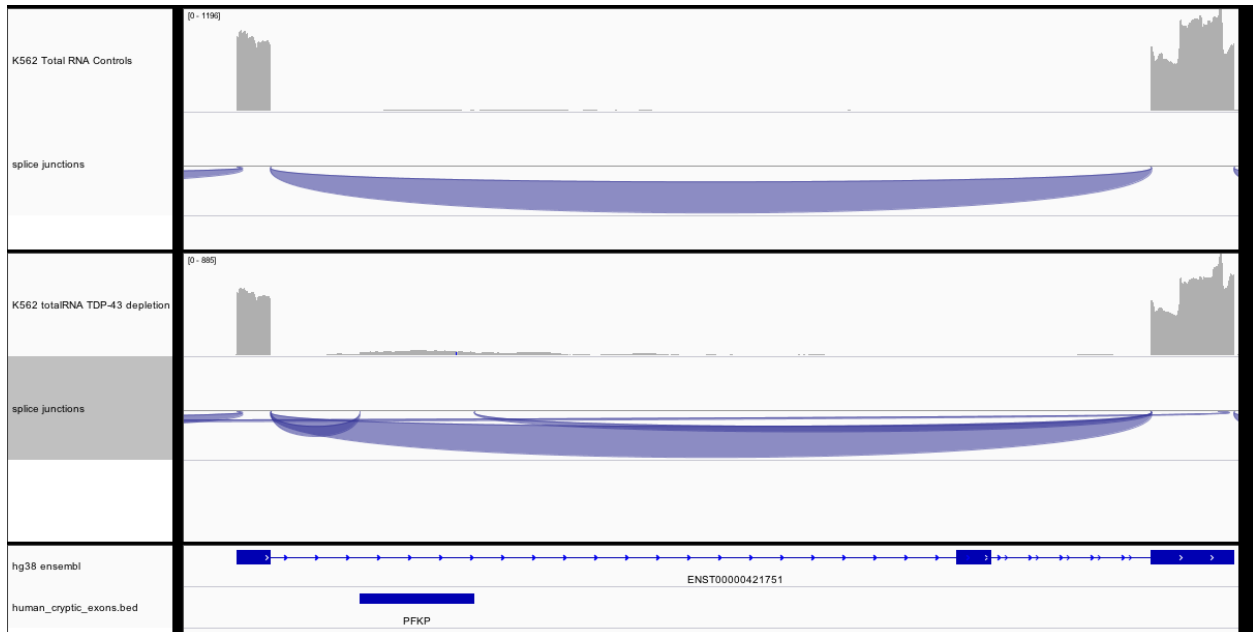

# 58 PKN1 E016i2

## Human K562 mRNA

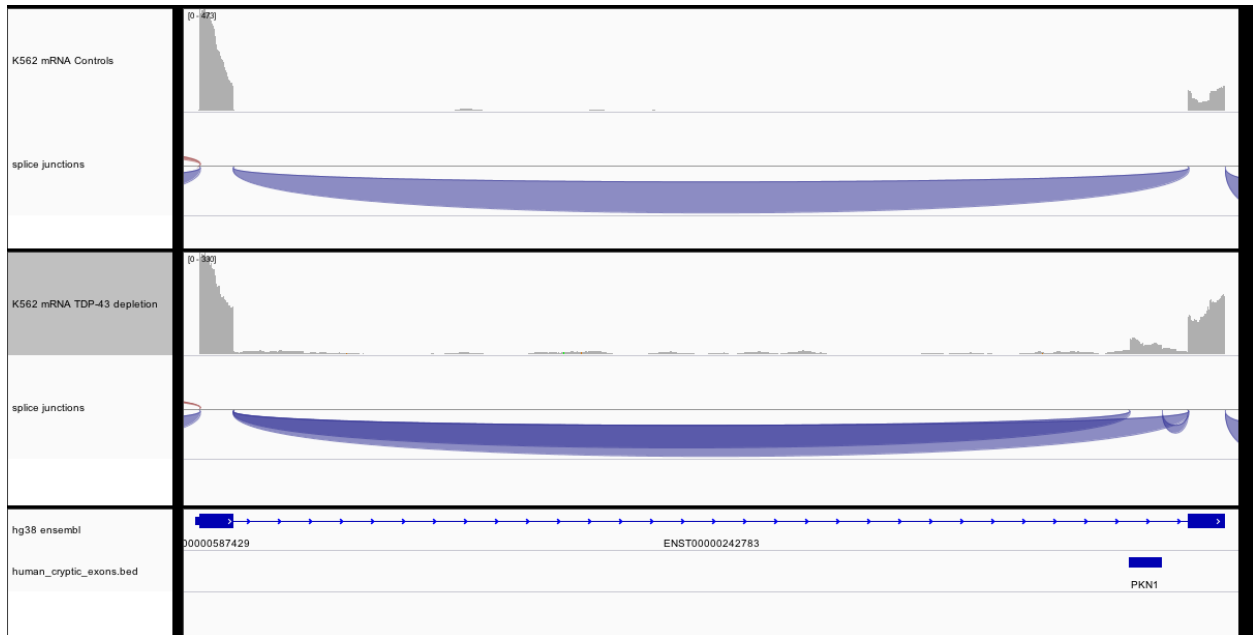

## Human K562 total RNA

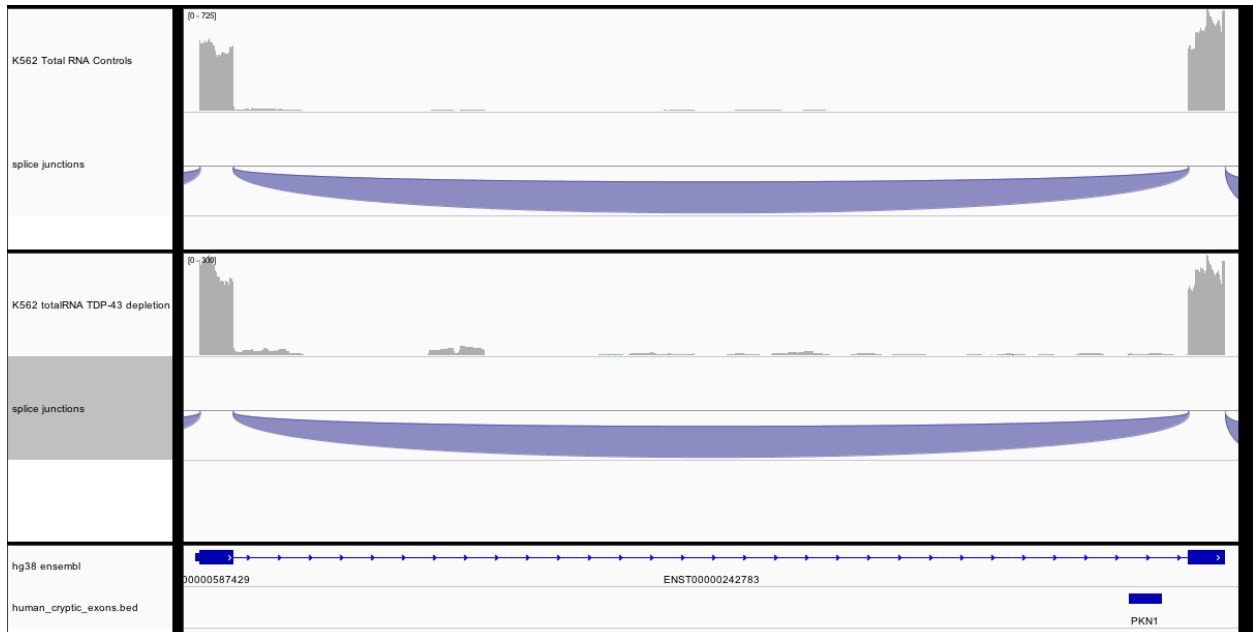

# 59 FAM114A2 E040i1

## Human K562 mRNA

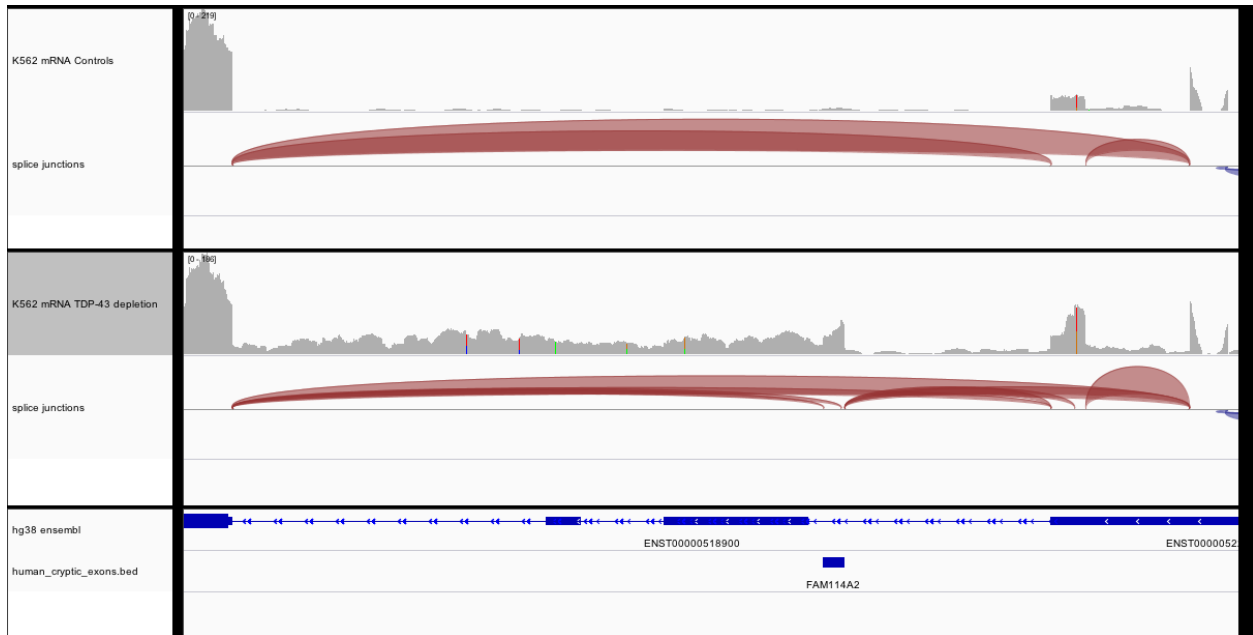

## Human K562 total RNA

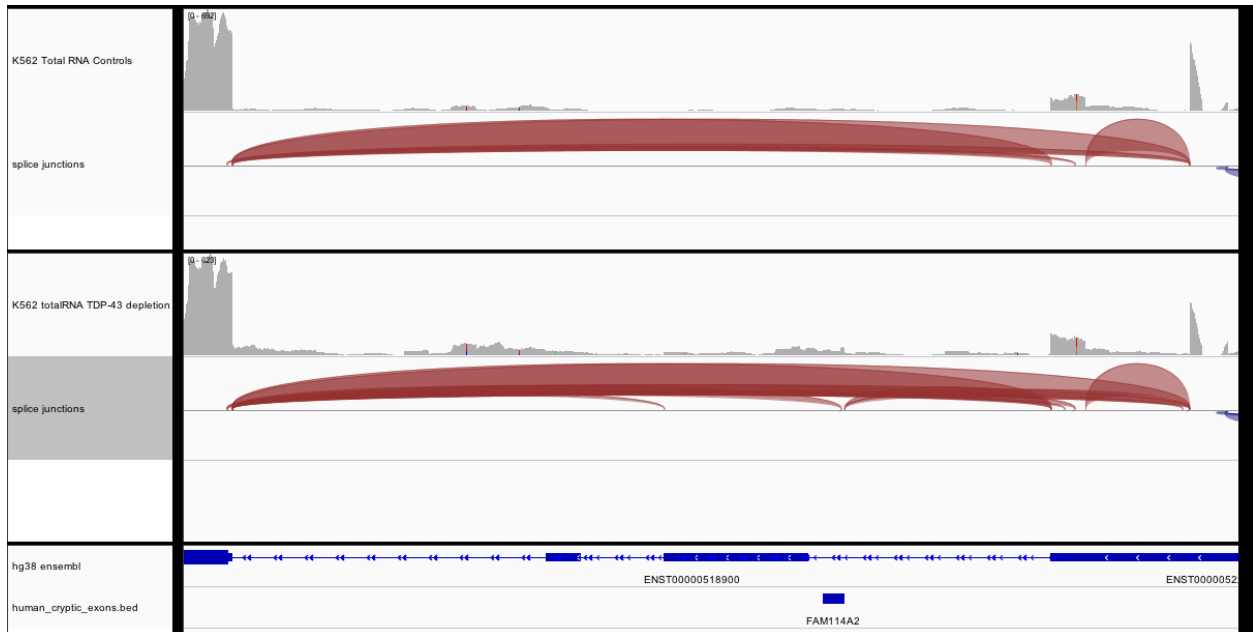

# 60 HDGFRP2 E015i1

Human K562 mRNA

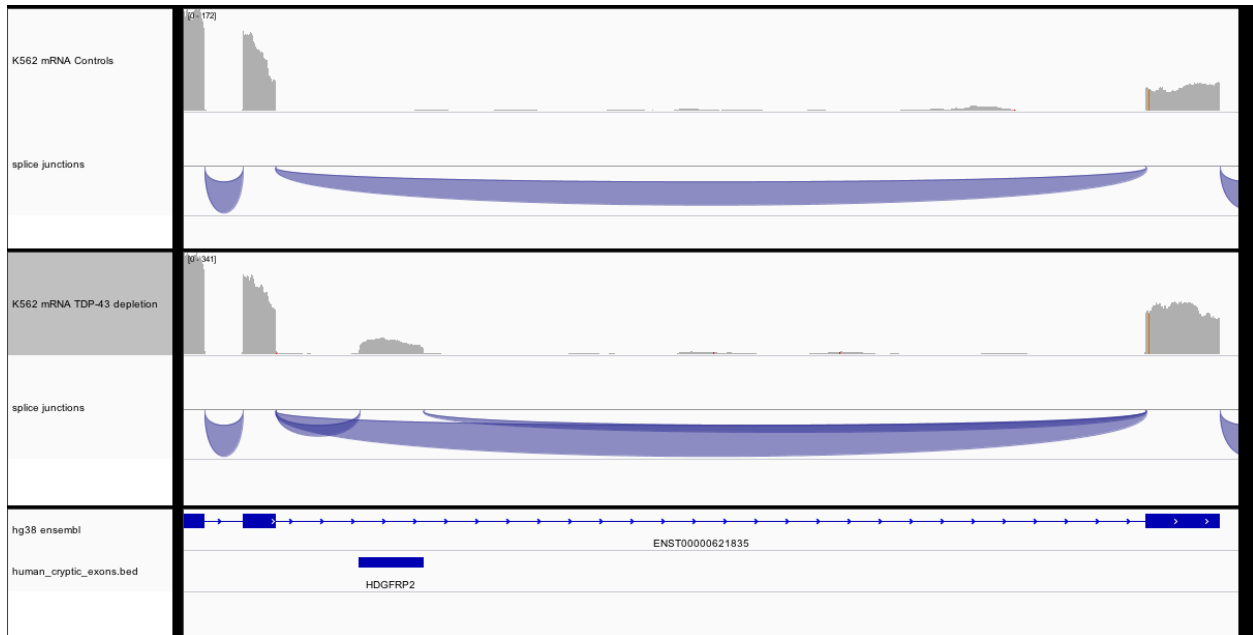

Human K562 total RNA

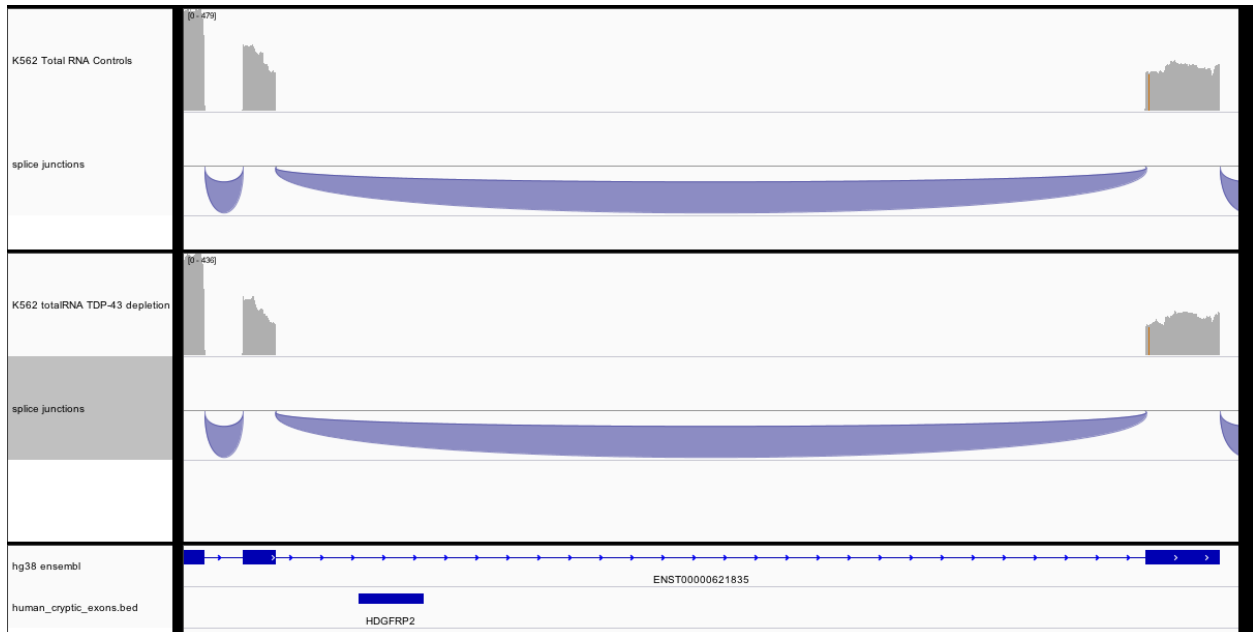

# 61 PRPF38A E003i1

Human K562 mRNA

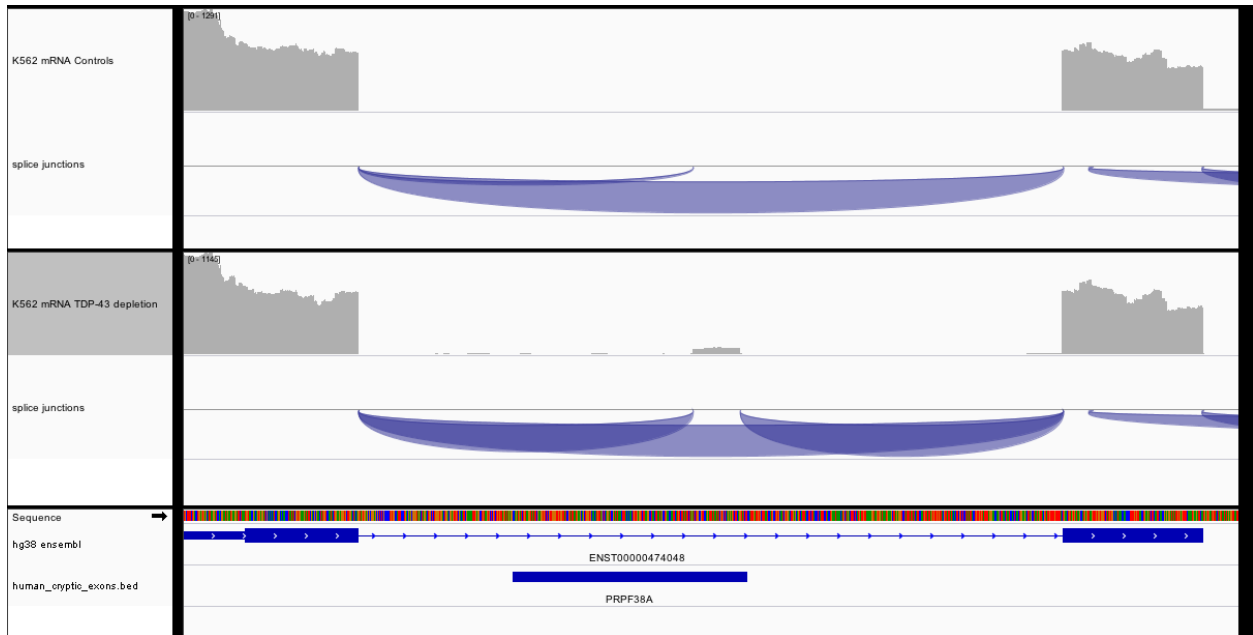

Human K562 total RNA

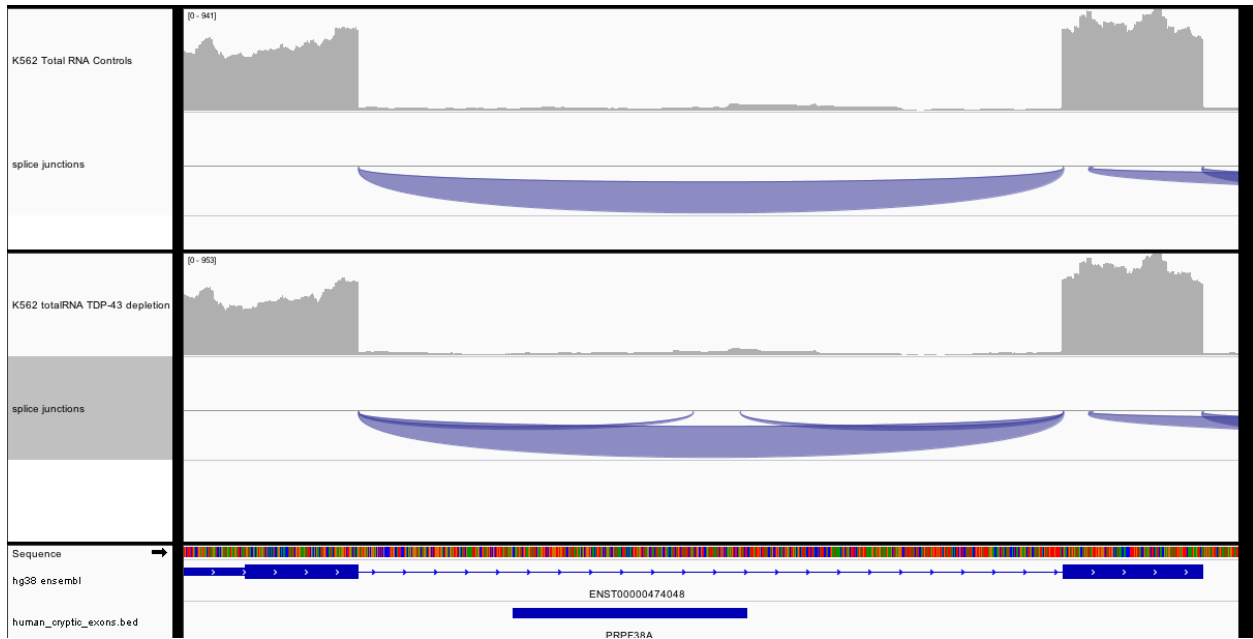

# 62 ATG4B E047i1

## Human K562 mRNA

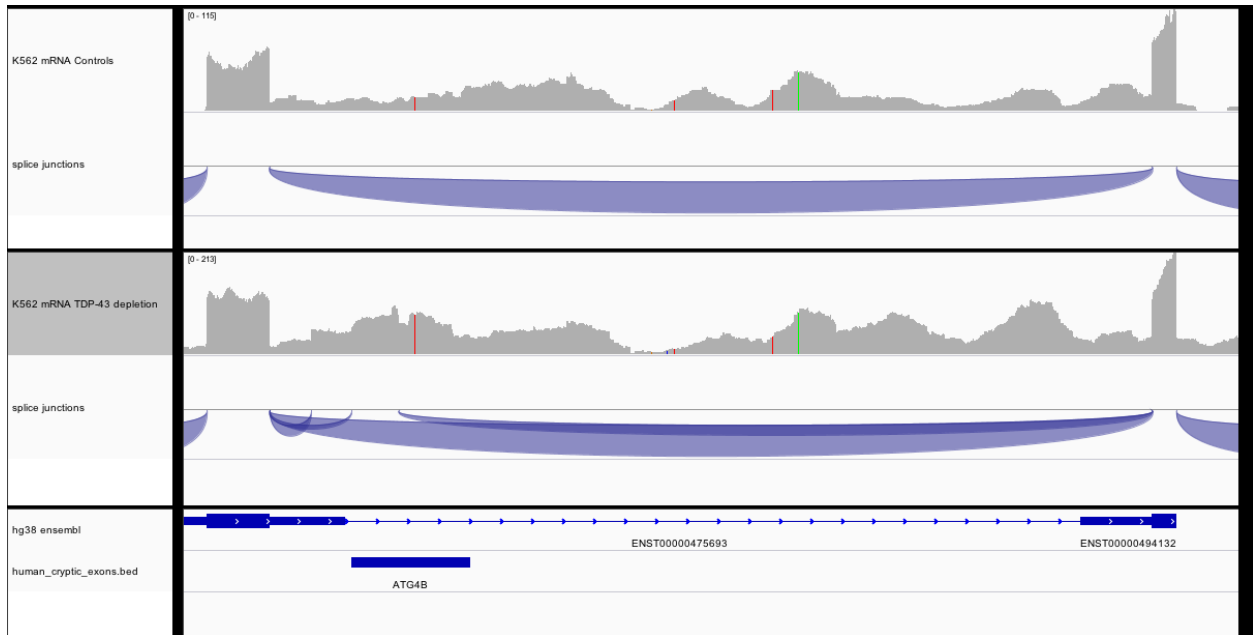

## Human K562 total RNA

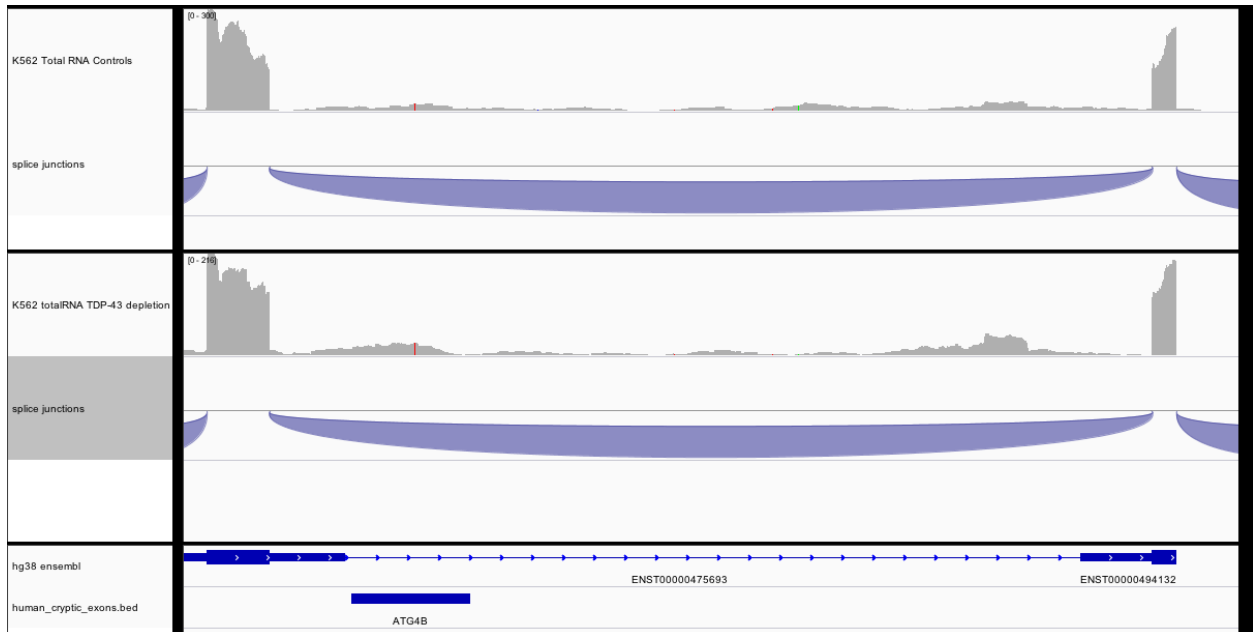

# 63 ADSS E020i1

## Human K562 mRNA

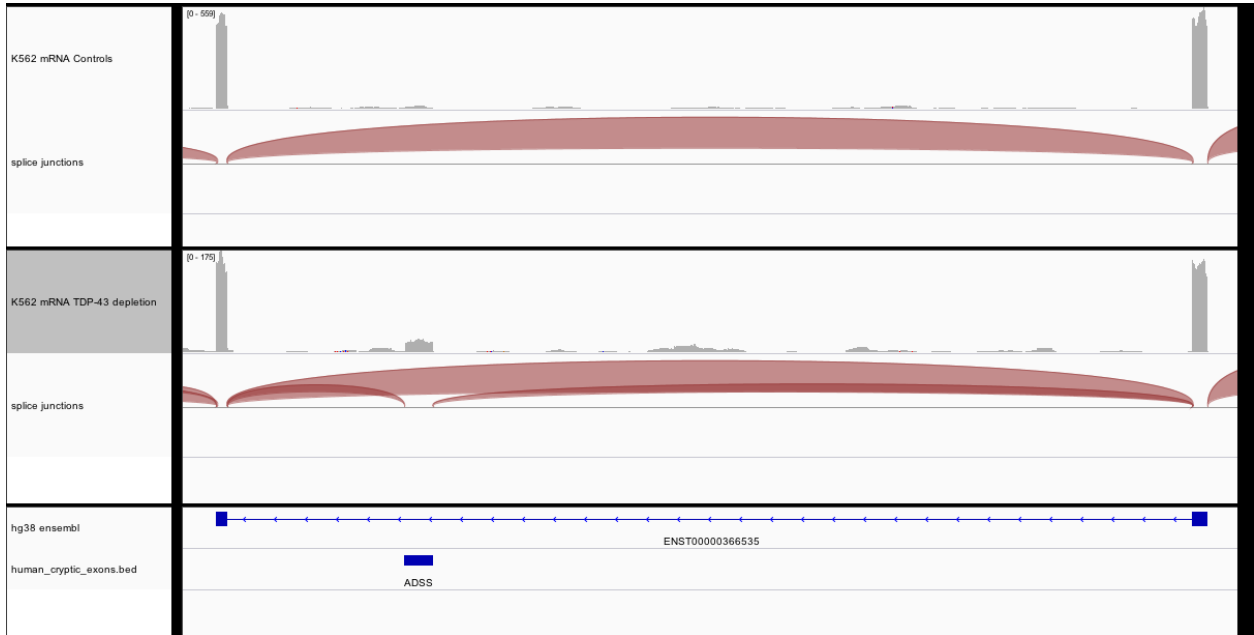

## Human K562 total RNA

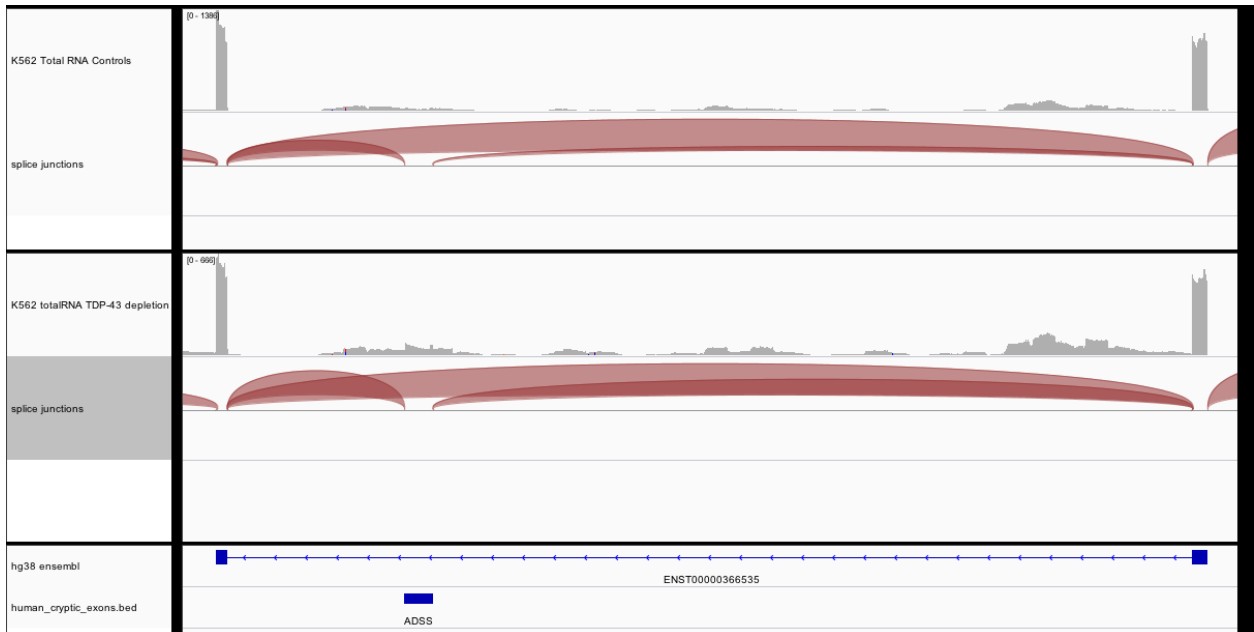



# 64 NSUN2 E024i1

## Human K562 mRNA

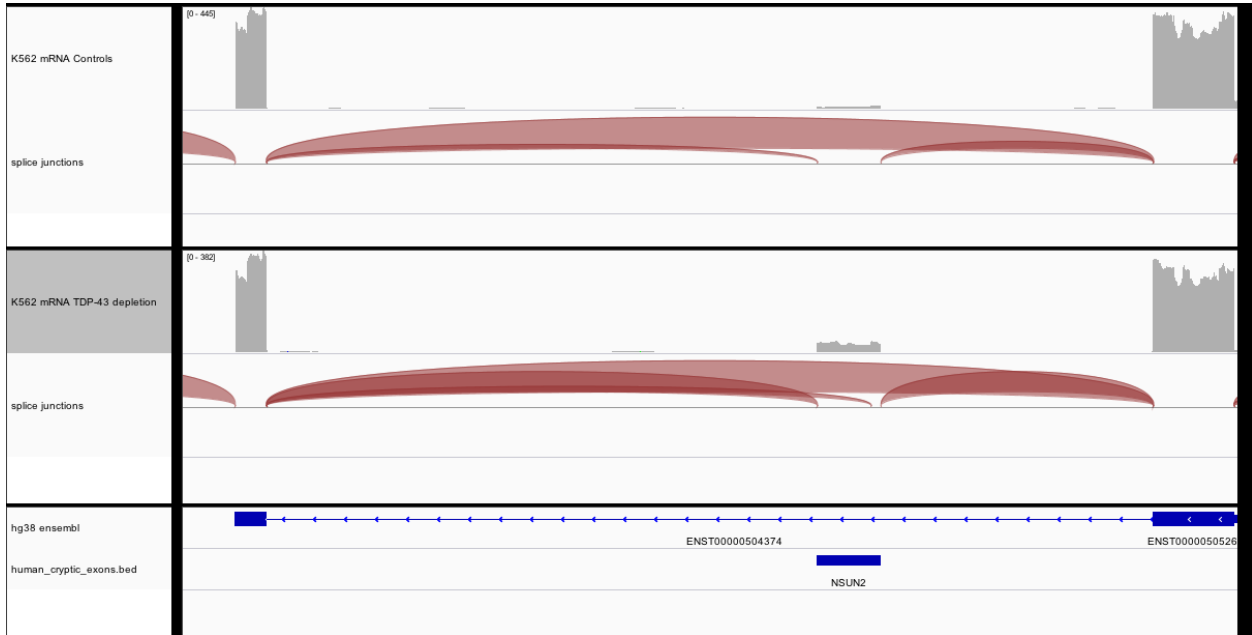

## Human K562 total RNA

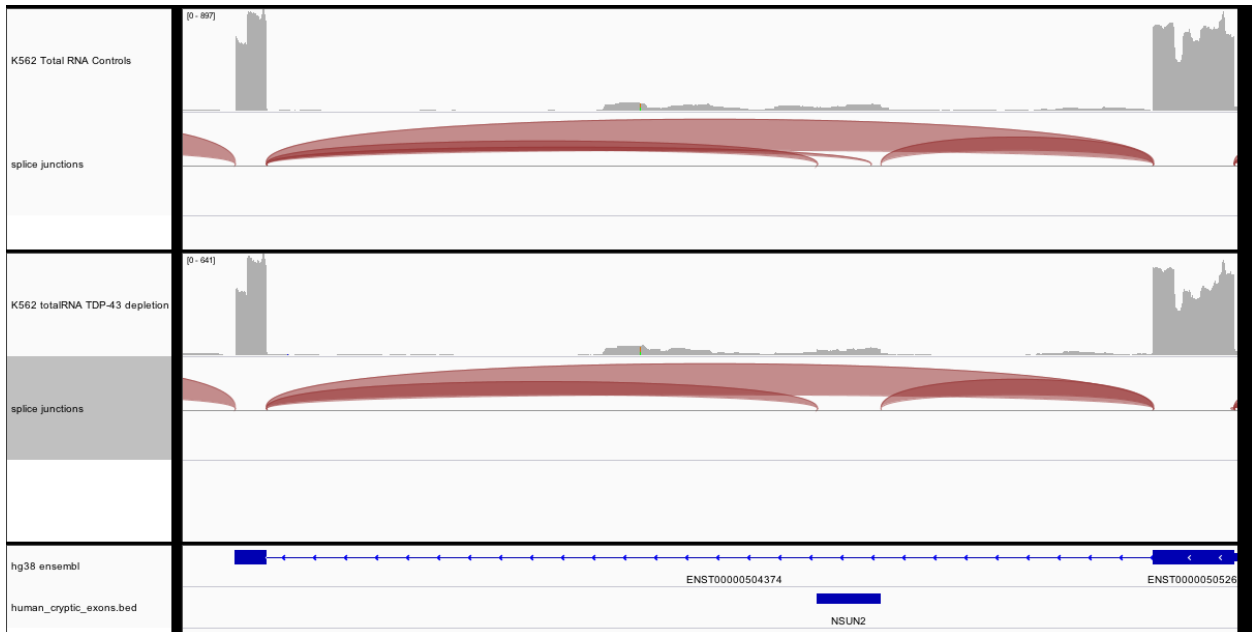

# 65 TAOK3 E007i1

Human K562 mRNA

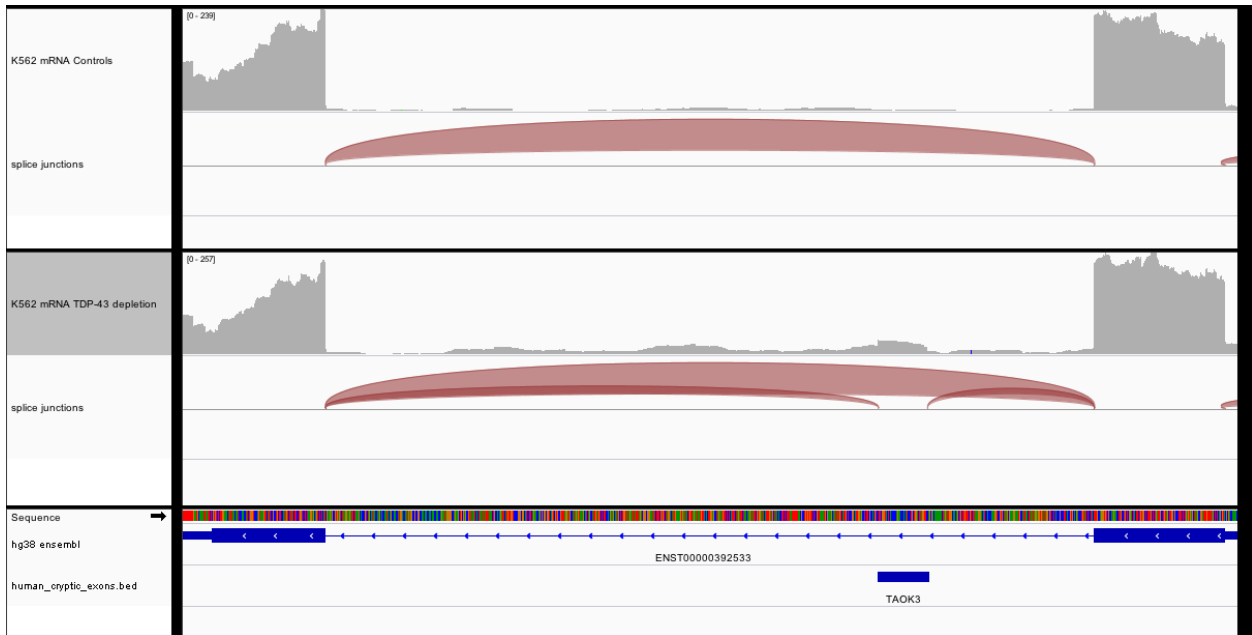

Human K562 total RNA

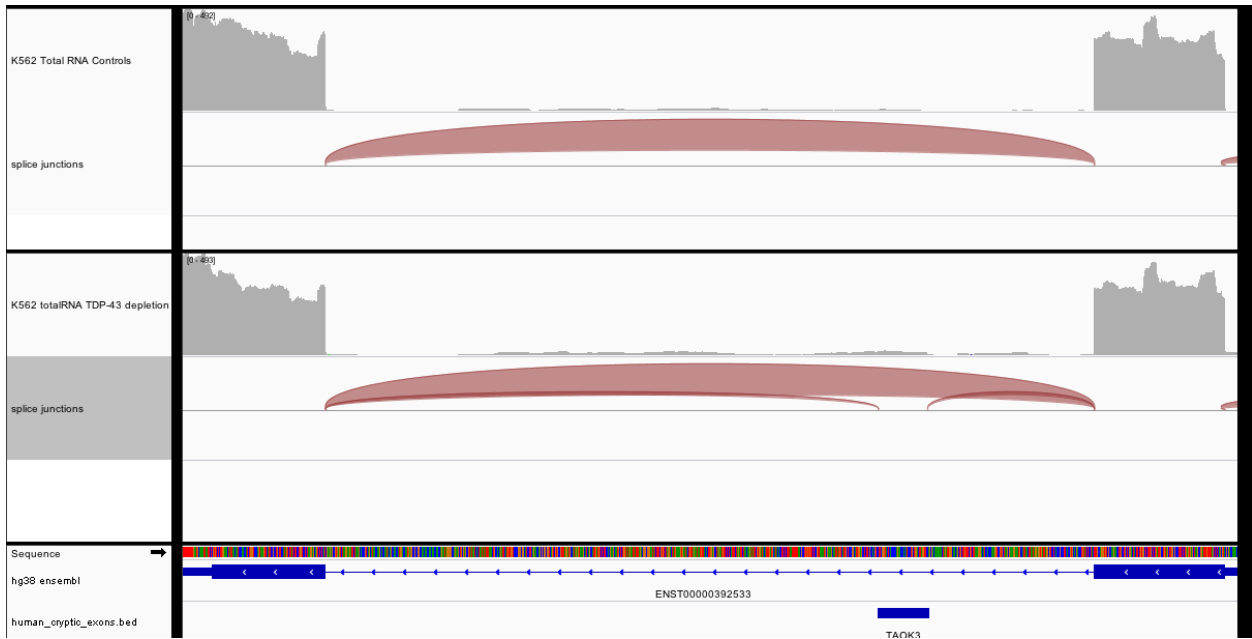

# 66 CORO7-PAM16+CORO7 E081i1

## Human K562 mRNA

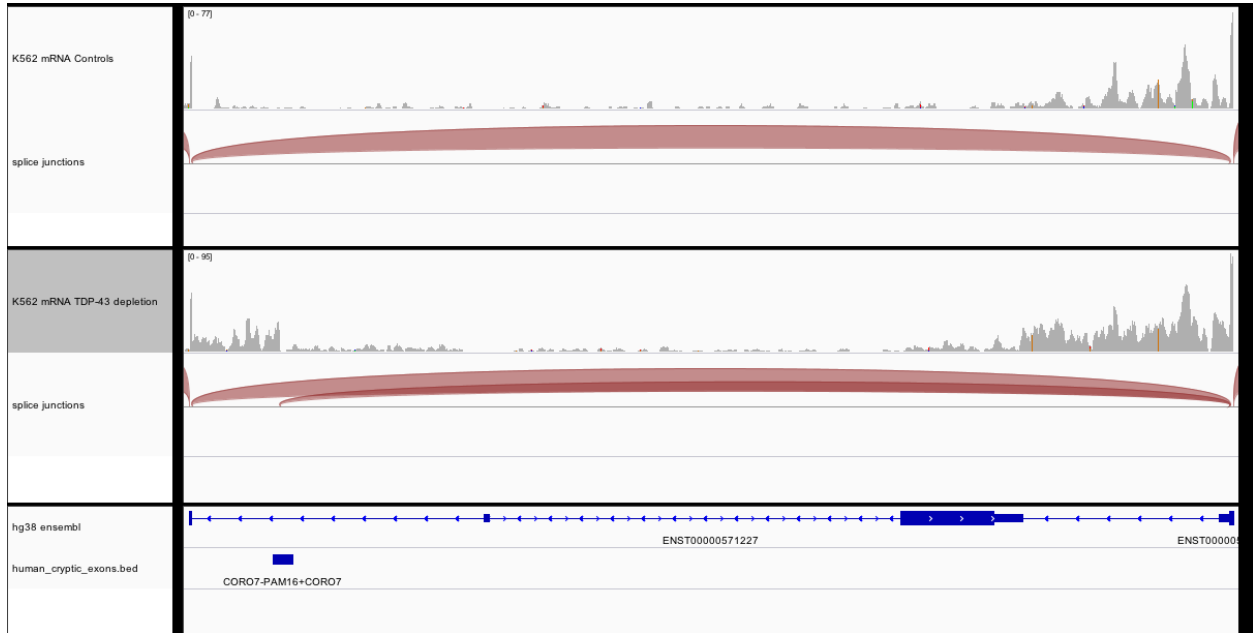

## Human K562 total RNA

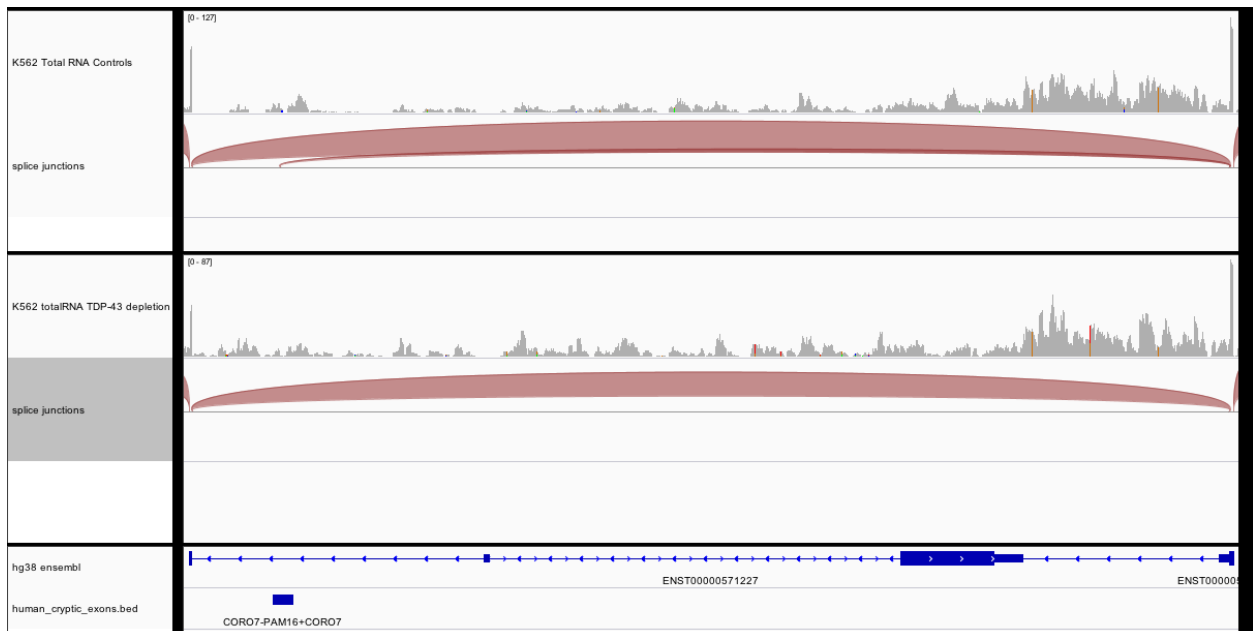

# 67 HBG2 E016i1

## Human K562 mRNA

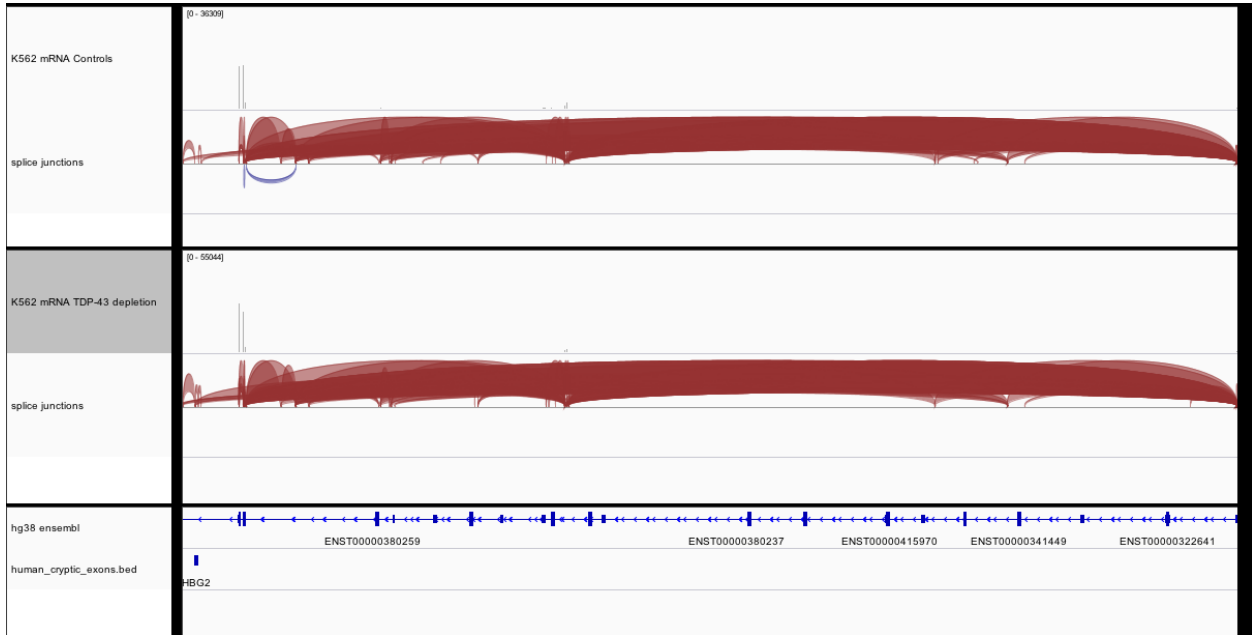

## Human K562 total RNA

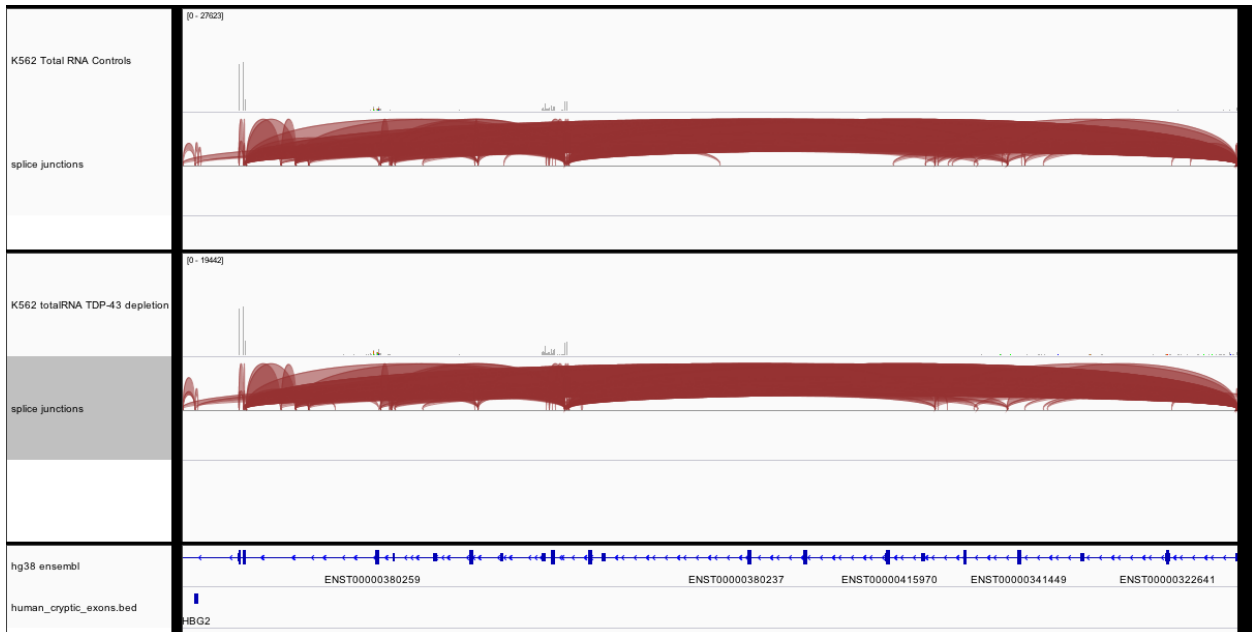

# 68 SSFA2 E024i1

## Human K562 mRNA

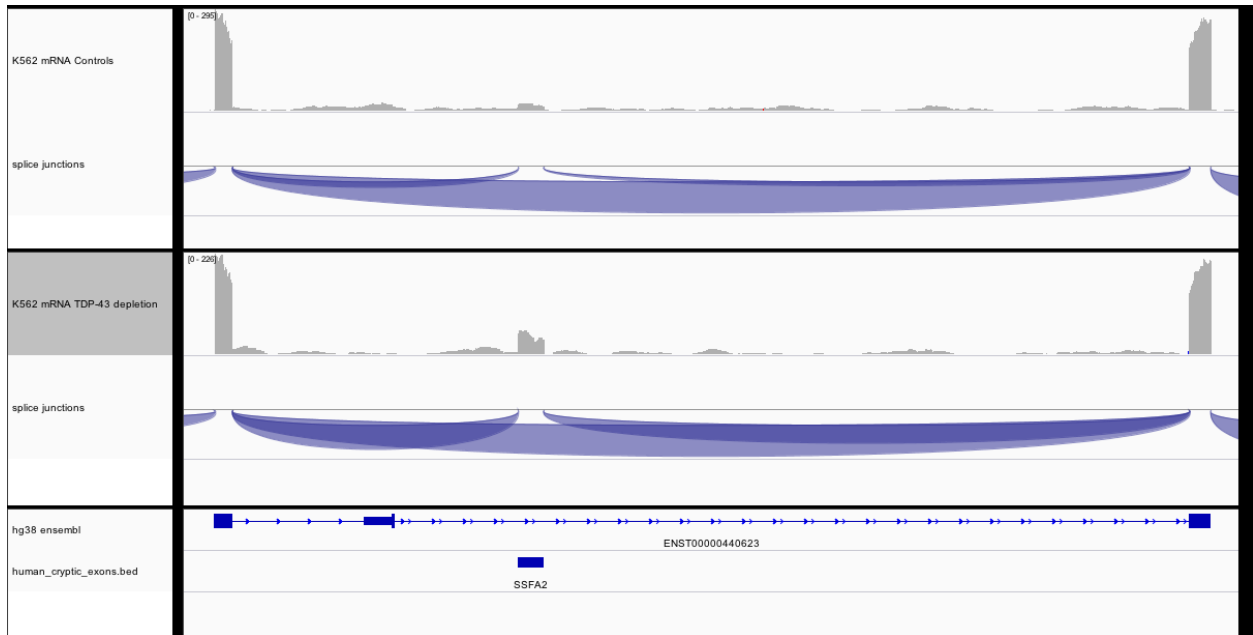

## Human K562 total RNA

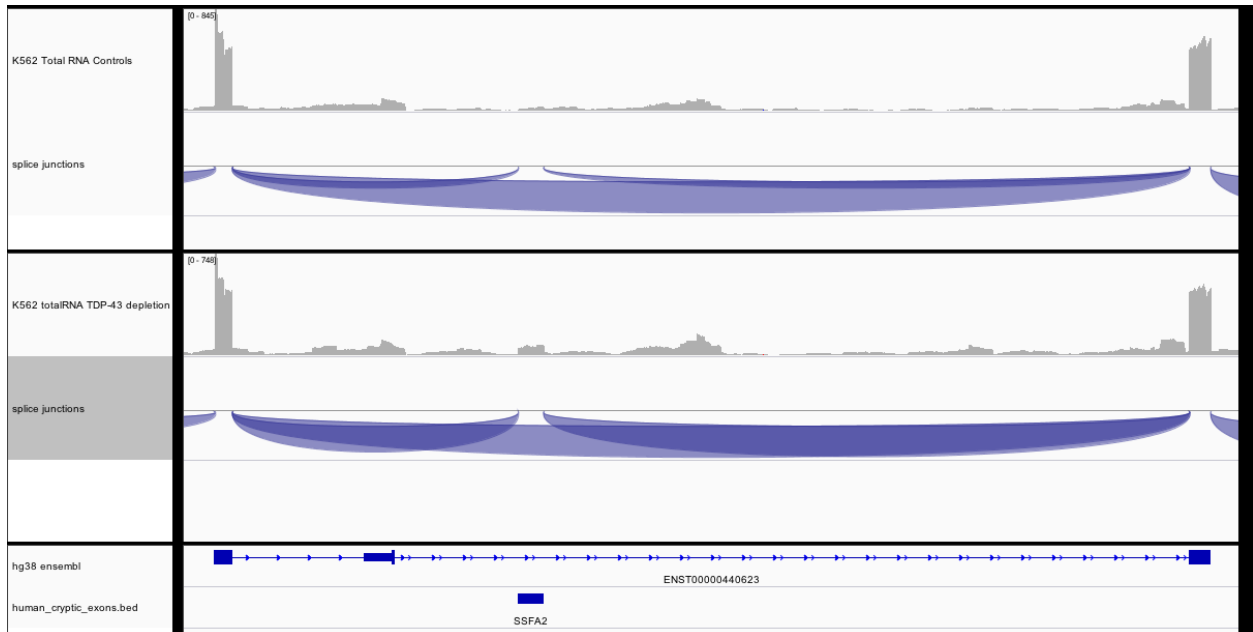

# 69 MARCH3 E009i1

Human K562 mRNA

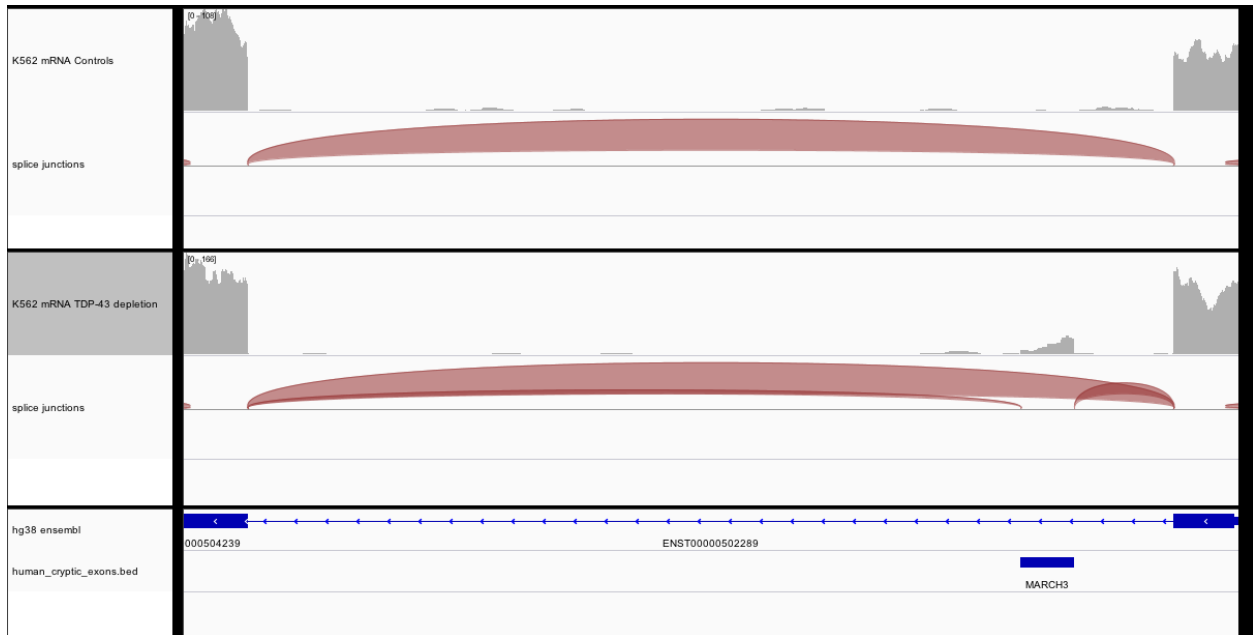

Human K562 total RNA

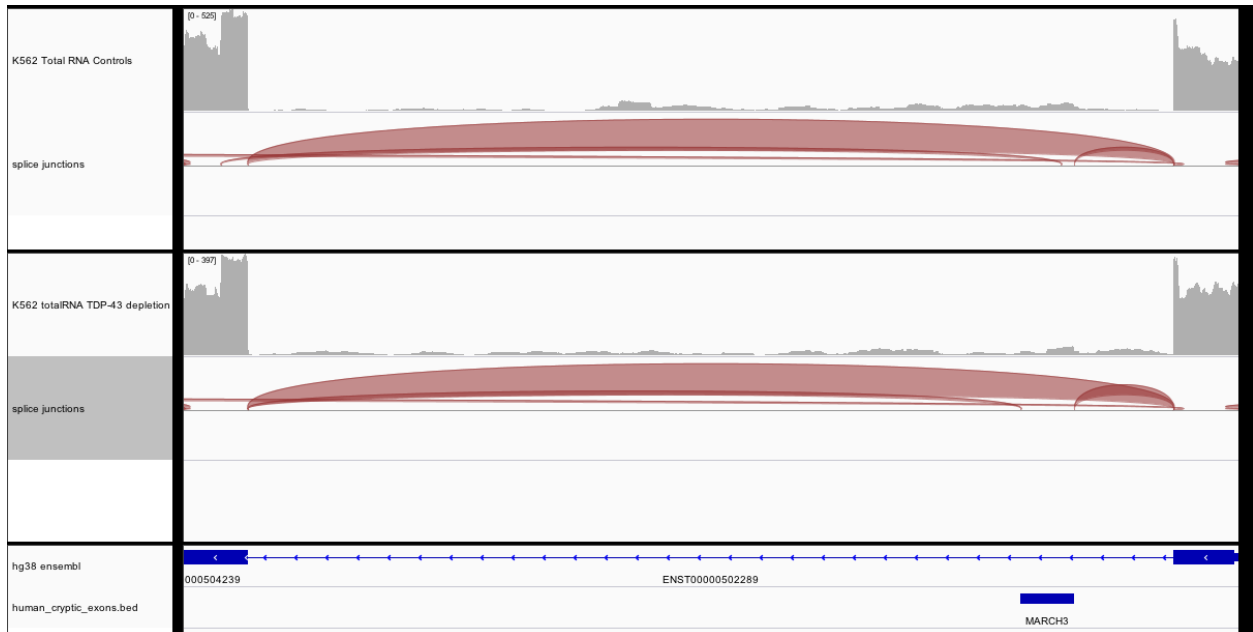

# 70 HERC1 E014i1

## Human K562 mRNA

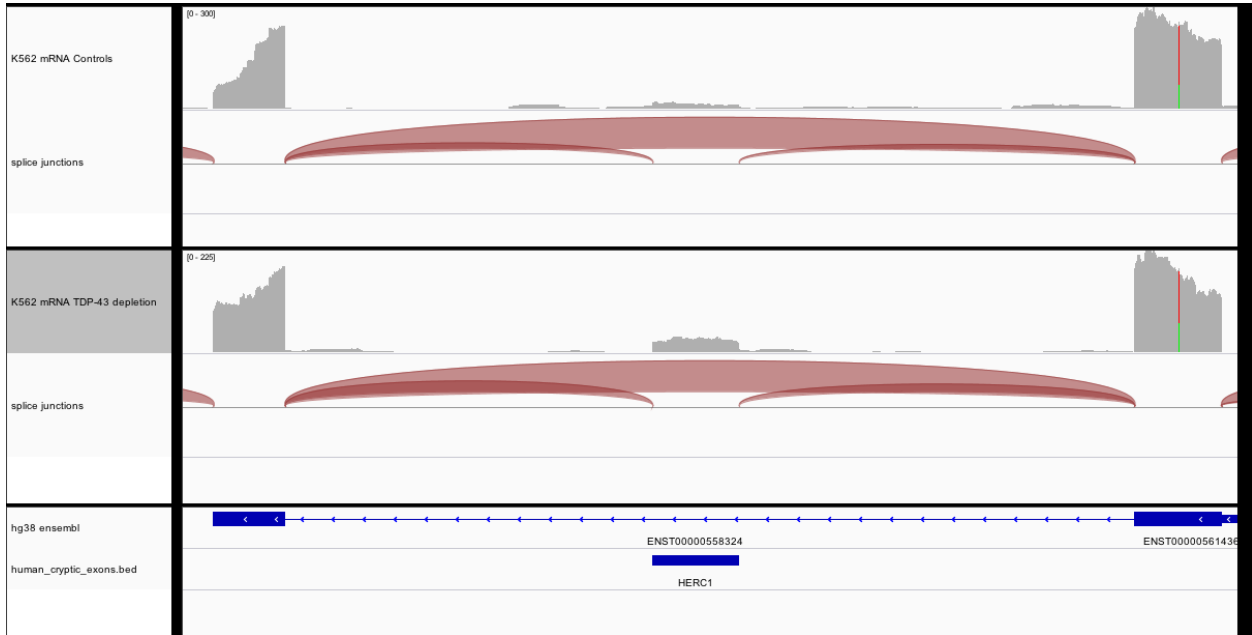

## Human K562 total RNA

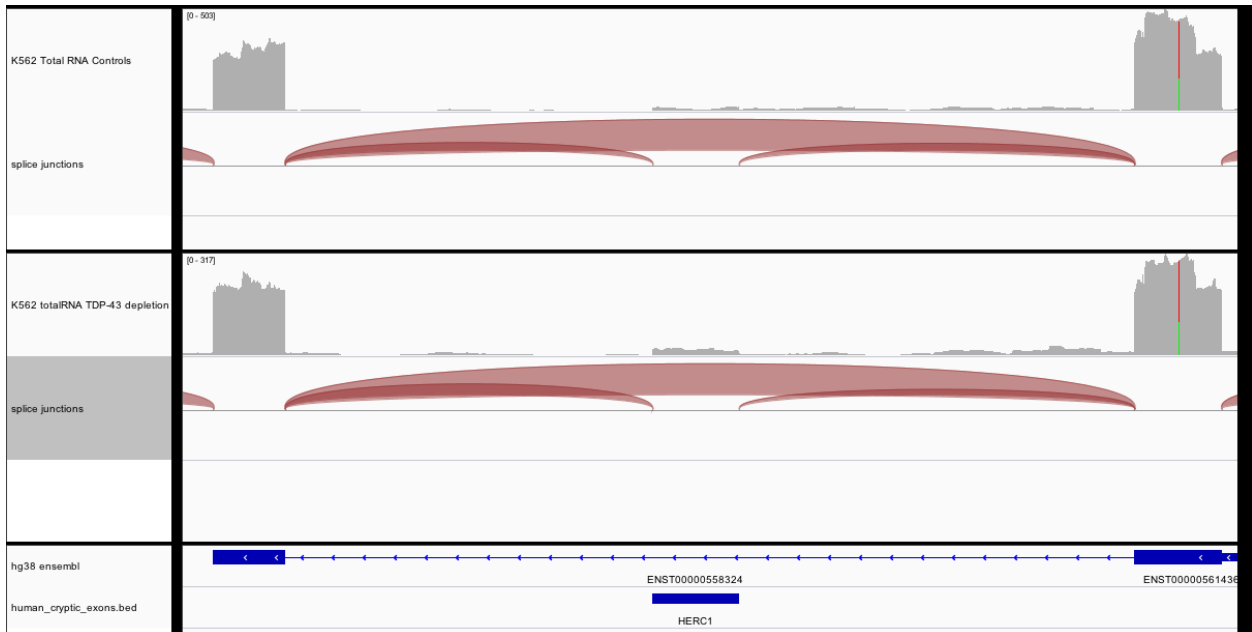

# 71 SP3 E011i1

## Human K562 mRNA

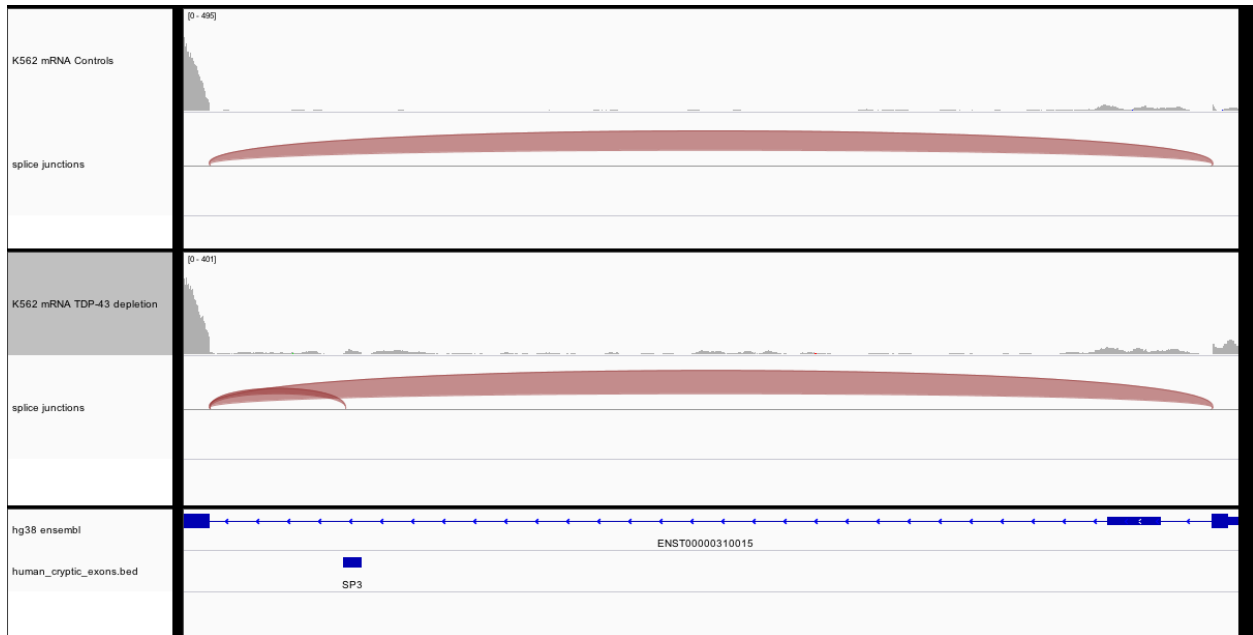

## Human K562 total RNA

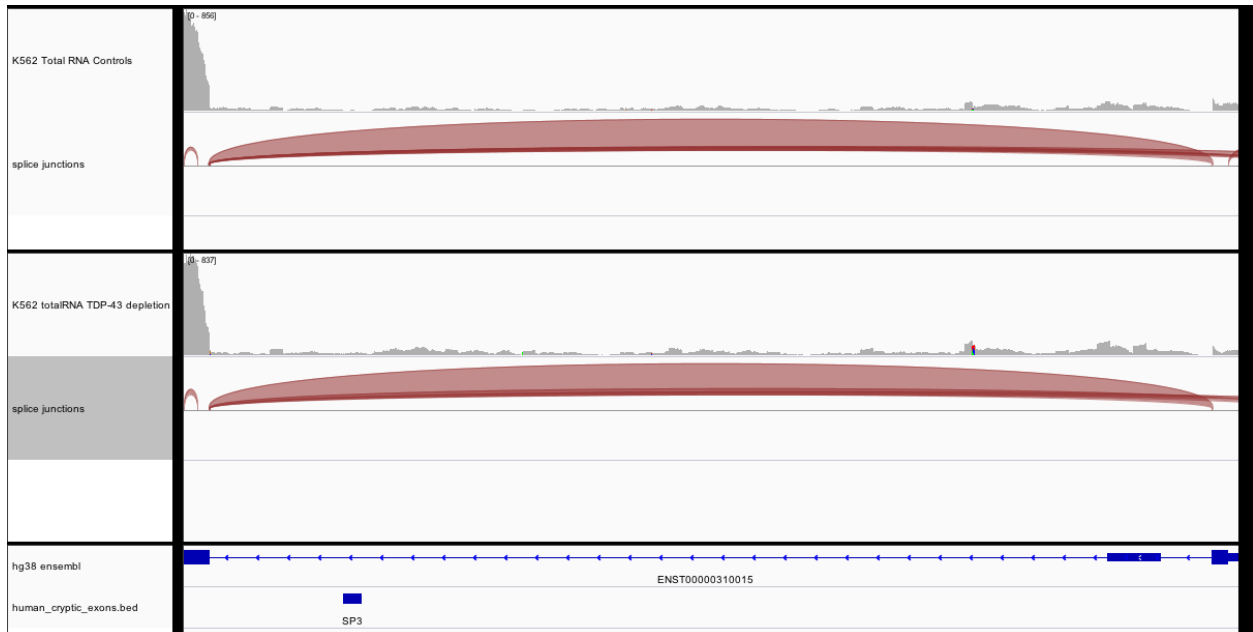



# 72 DDHD1 E023i1

## Human K562 mRNA

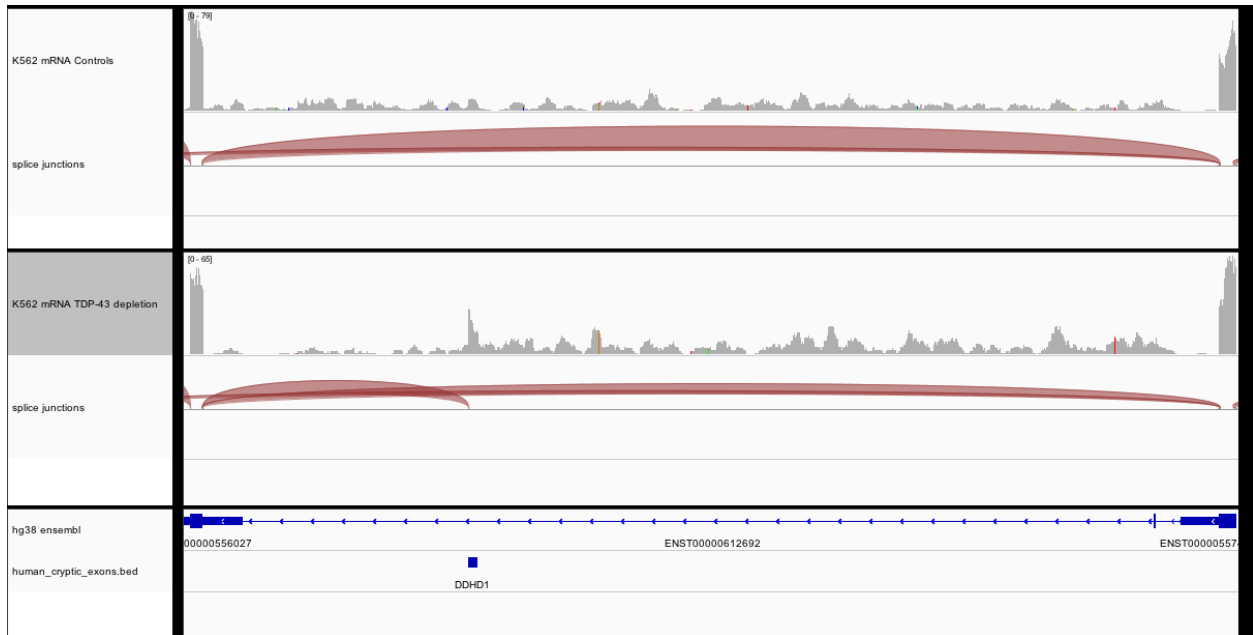

## Human K562 total RNA

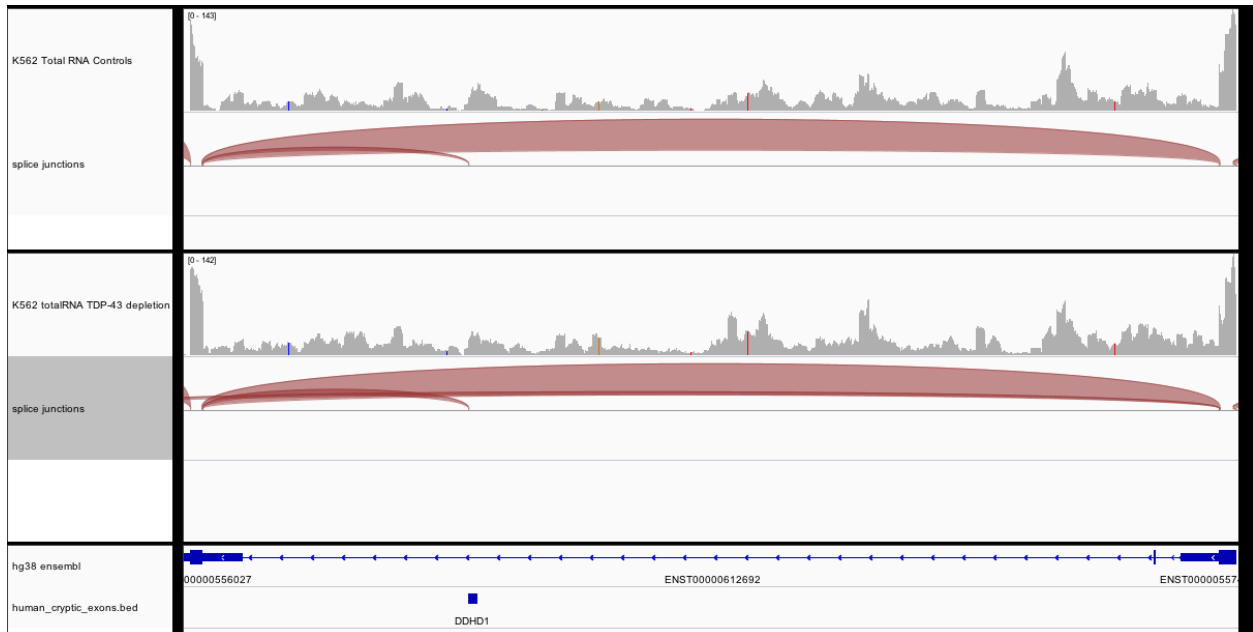

# 73 RP11-488L18-4 E001i4

## Human K562 mRNA

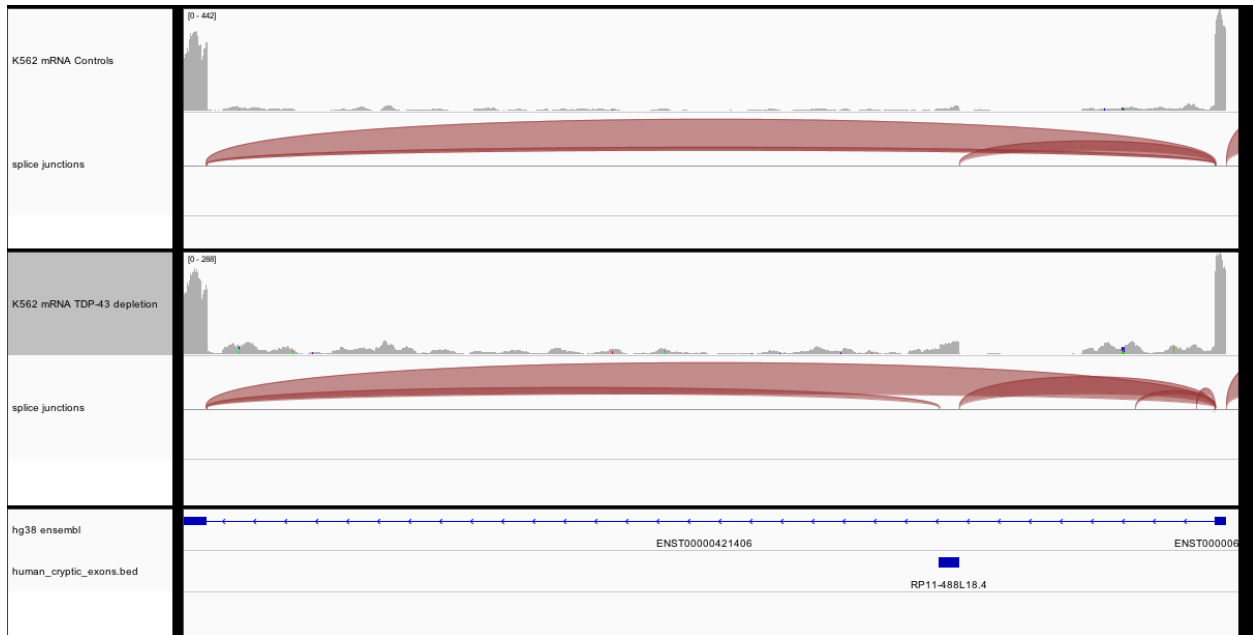

## Human K562 total RNA

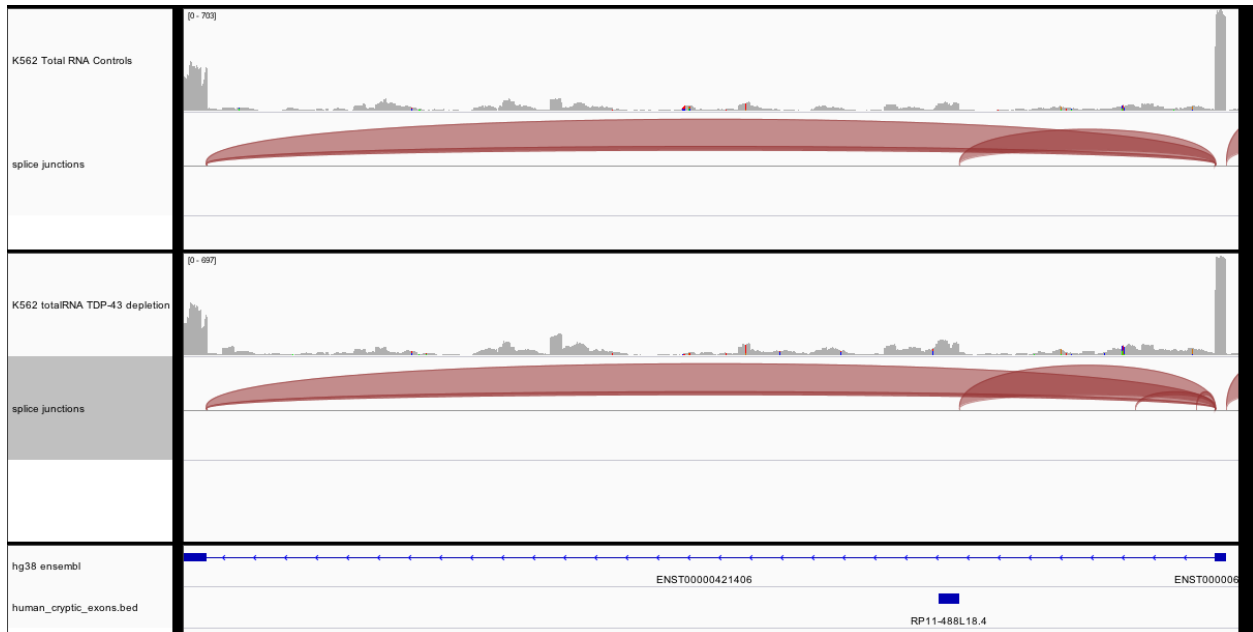

# 74 UHRF2 E017i2

## Human K562 mRNA

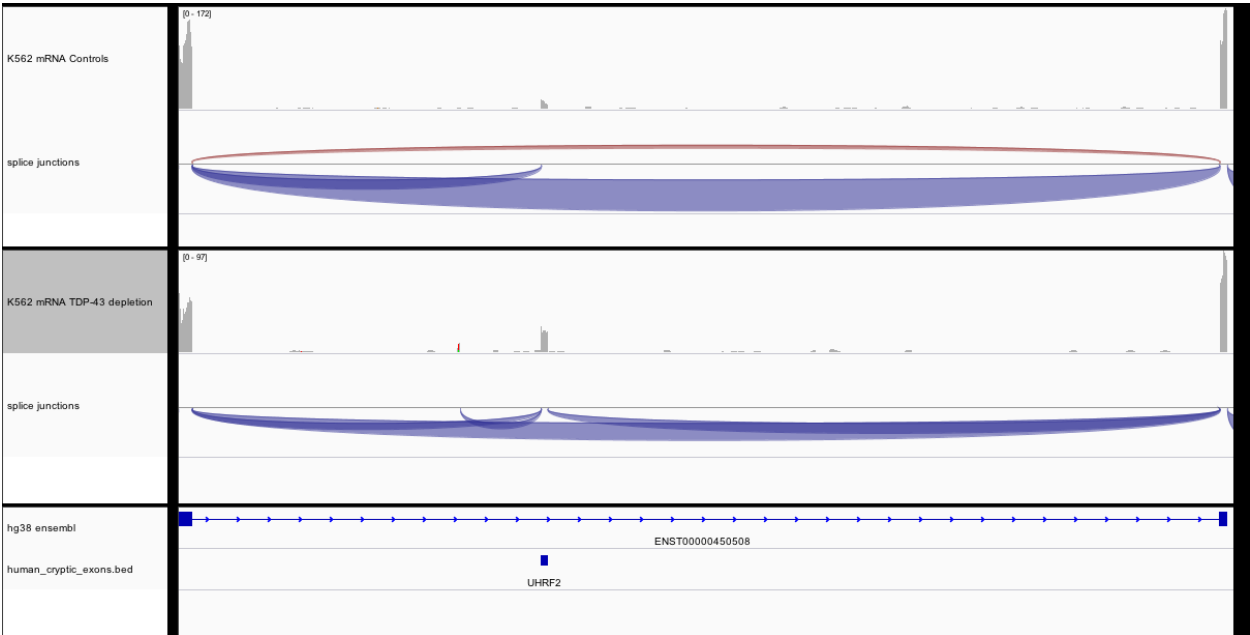

## Human K562 total RNA

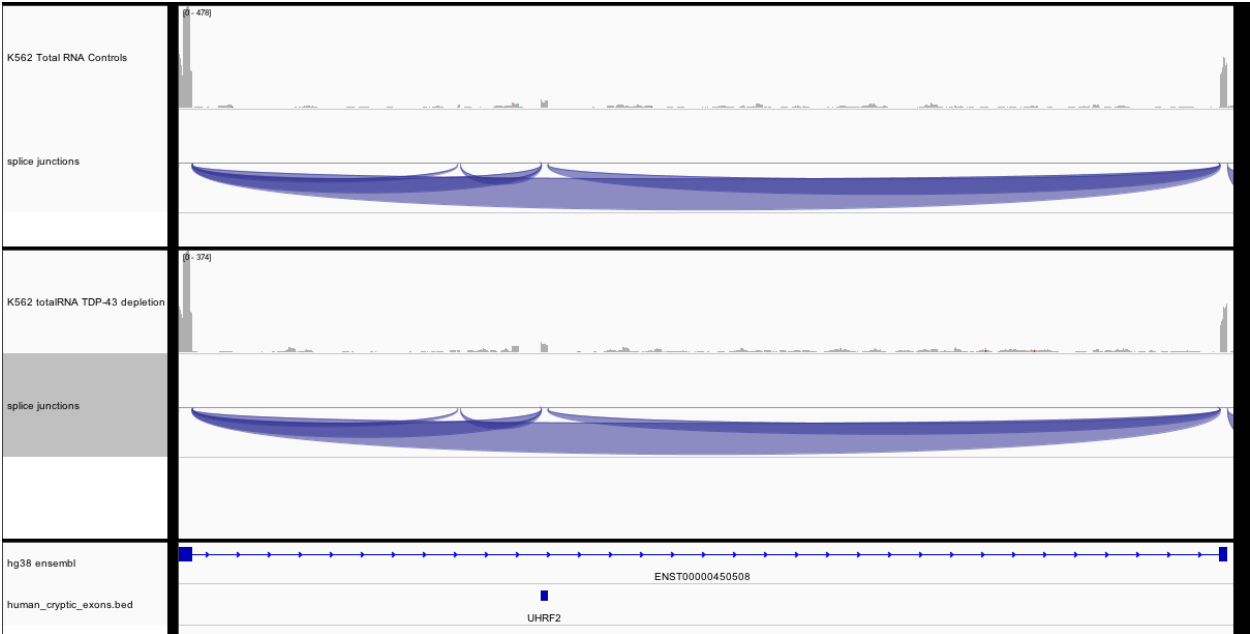

# 75 REV3L E028i1

## Human K562 mRNA

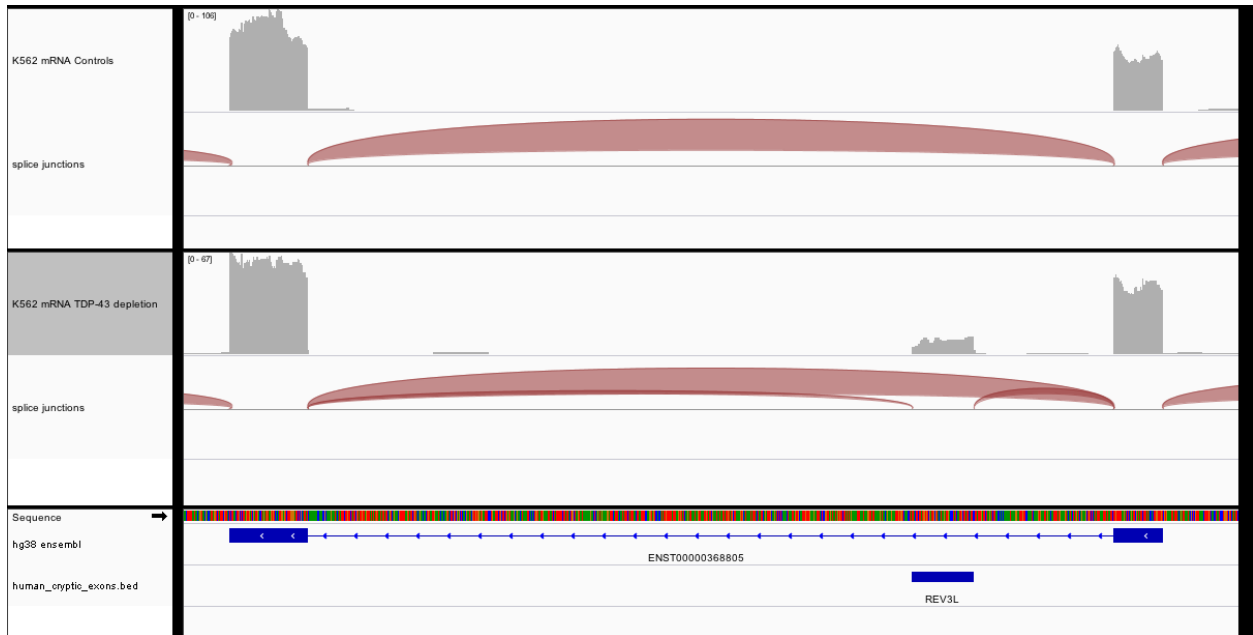

## Human K562 total RNA

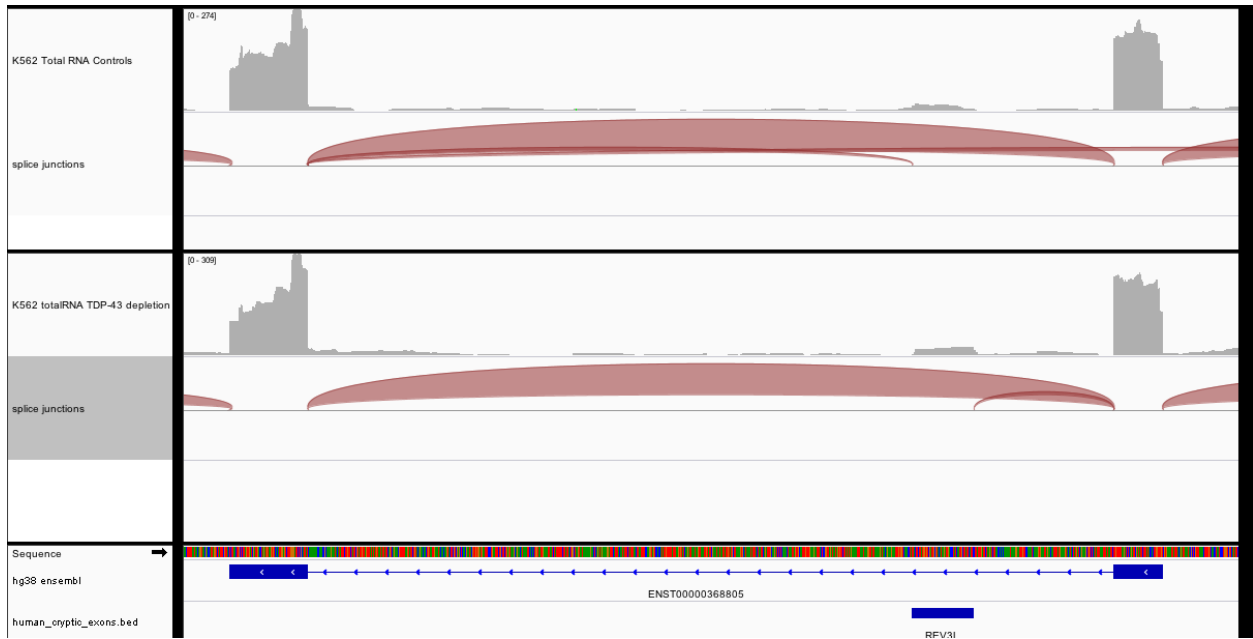

# 76 SLC12A2 E012i1

## Human K562 mRNA

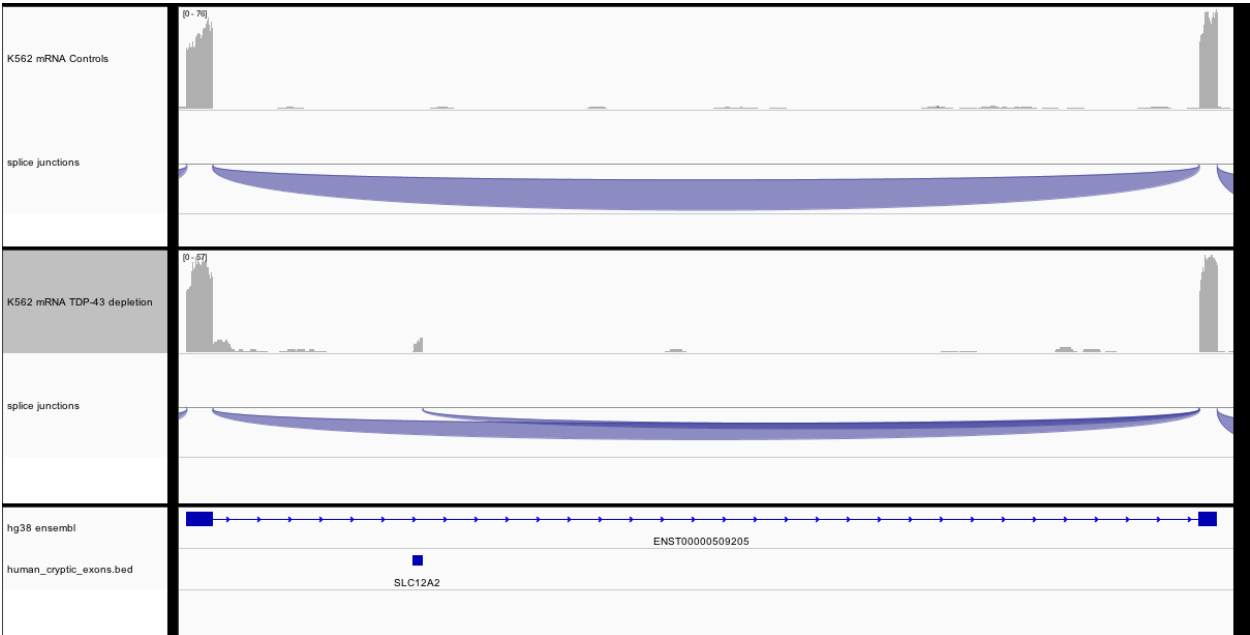

## Human K562 total RNA

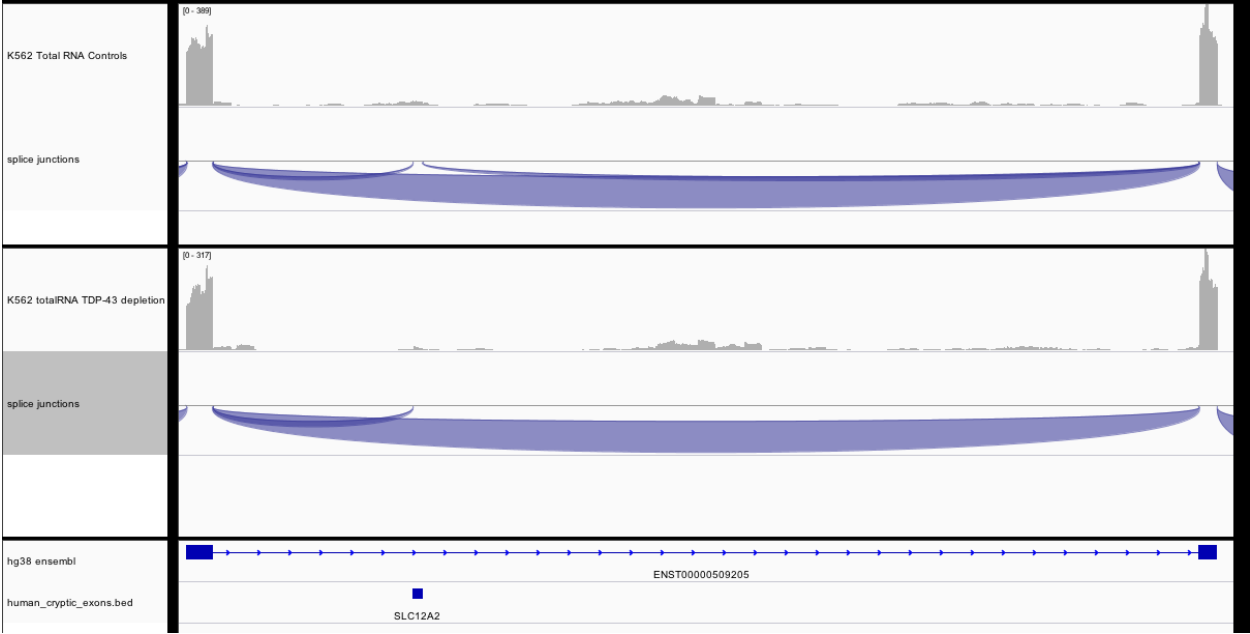

# 77 MED23 E025i1

## Human K562 mRNA

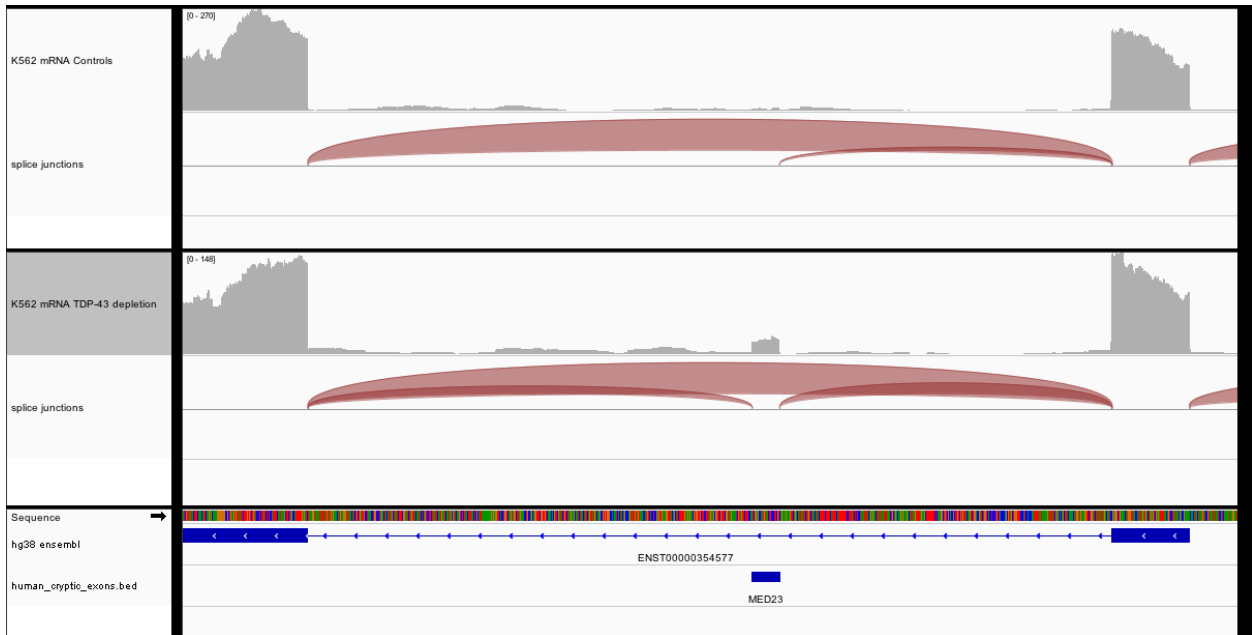

## Human K562 total RNA

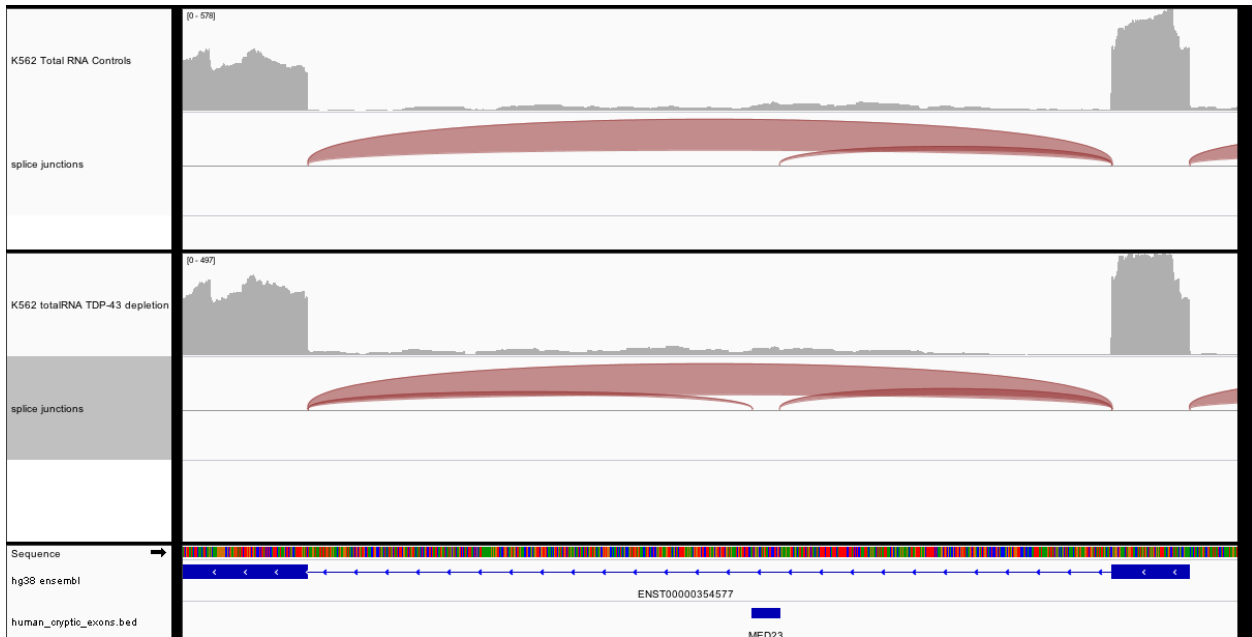

# 78 POLK E019i1

## Human K562 mRNA

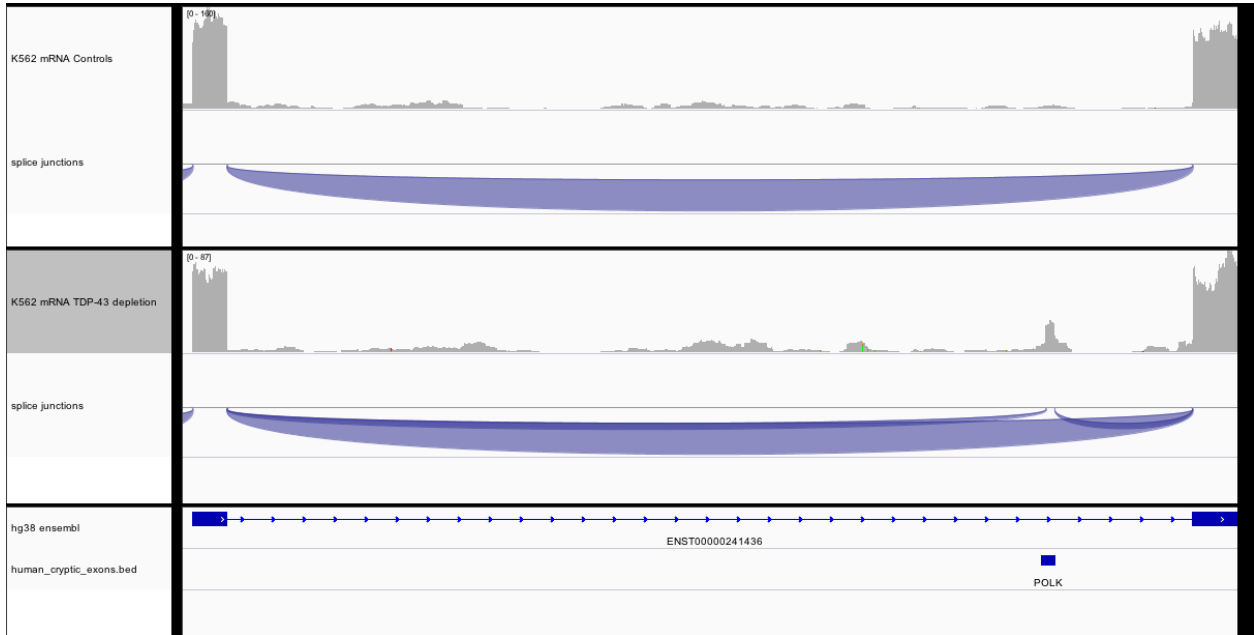

## Human K562 total RNA

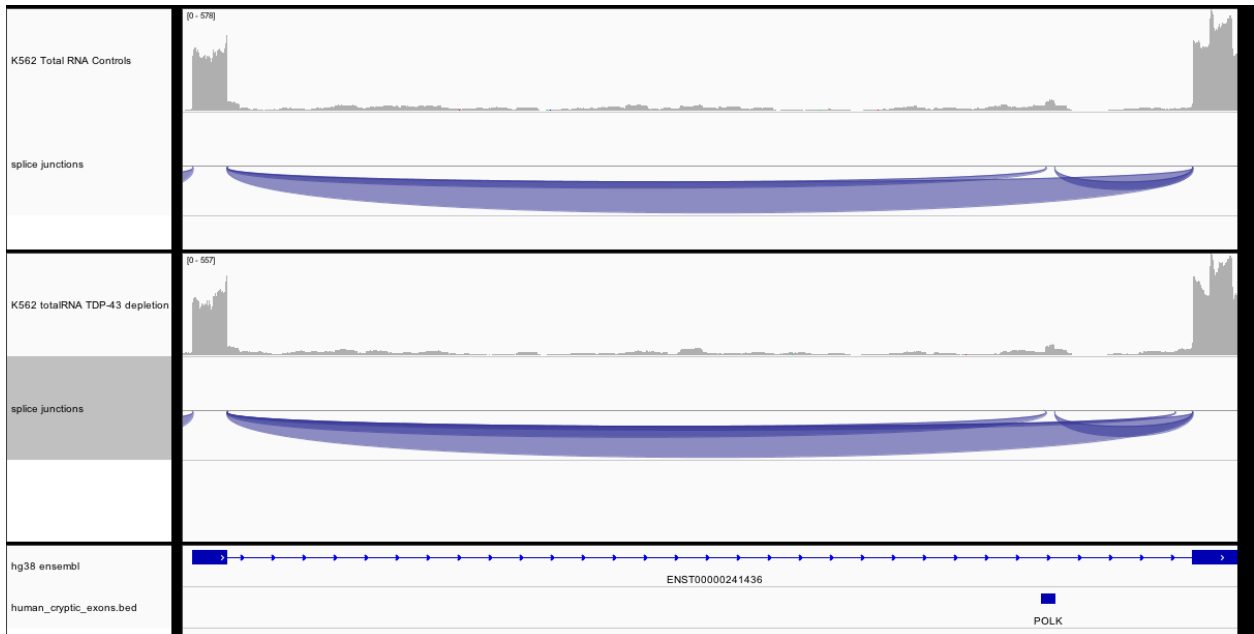

# 79 TRPM7 E027i1

## Human K562 mRNA

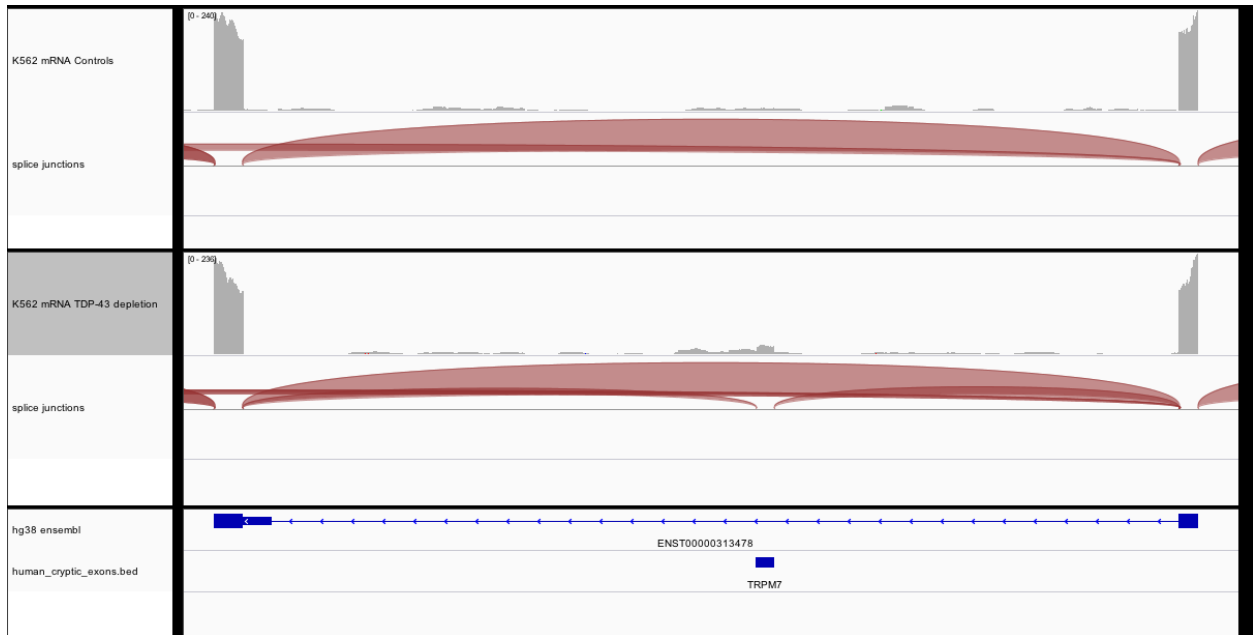

## Human K562 total RNA

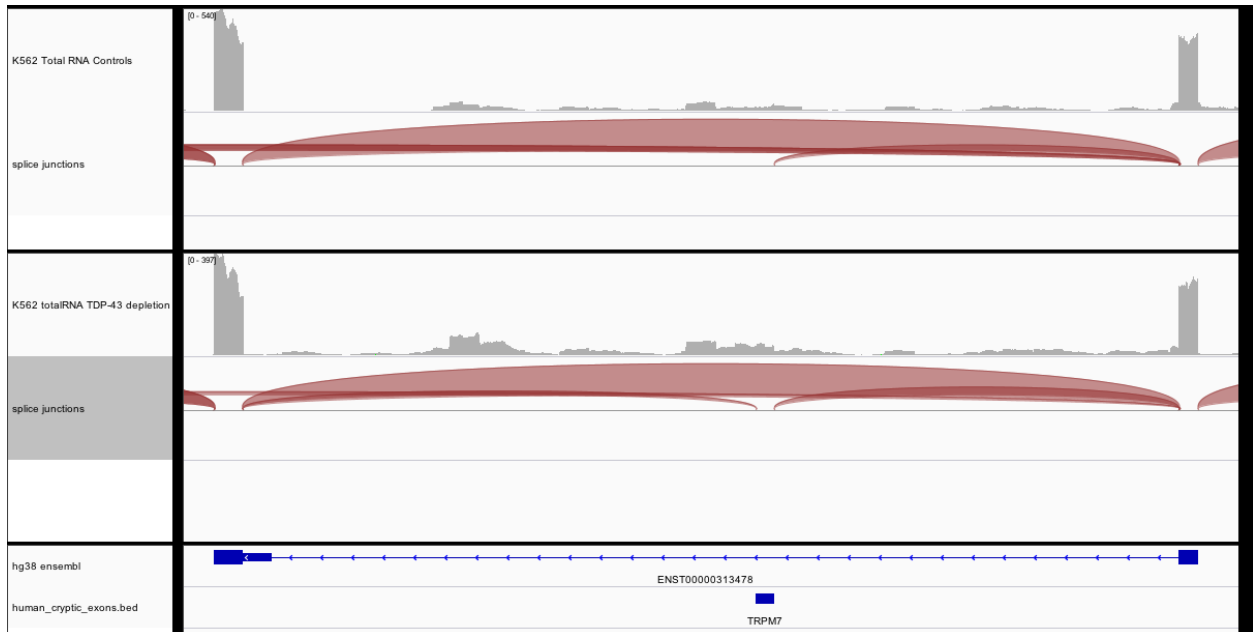



# 80 TRIM37 E029i1

## Human K562 mRNA

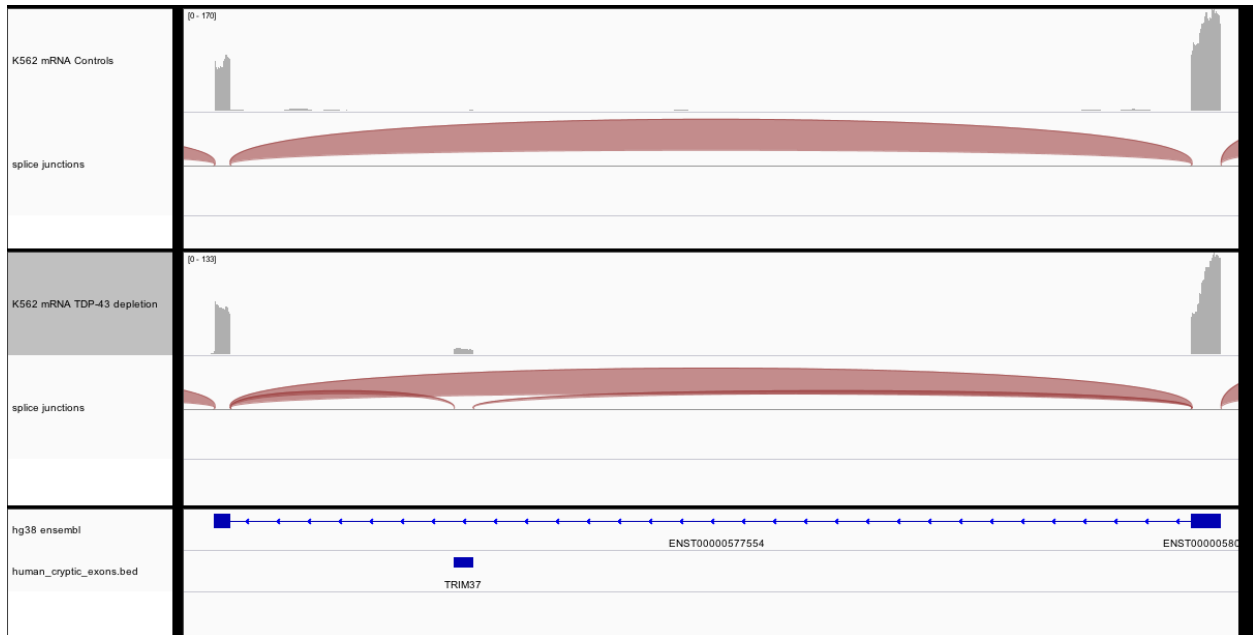

## Human K562 total RNA

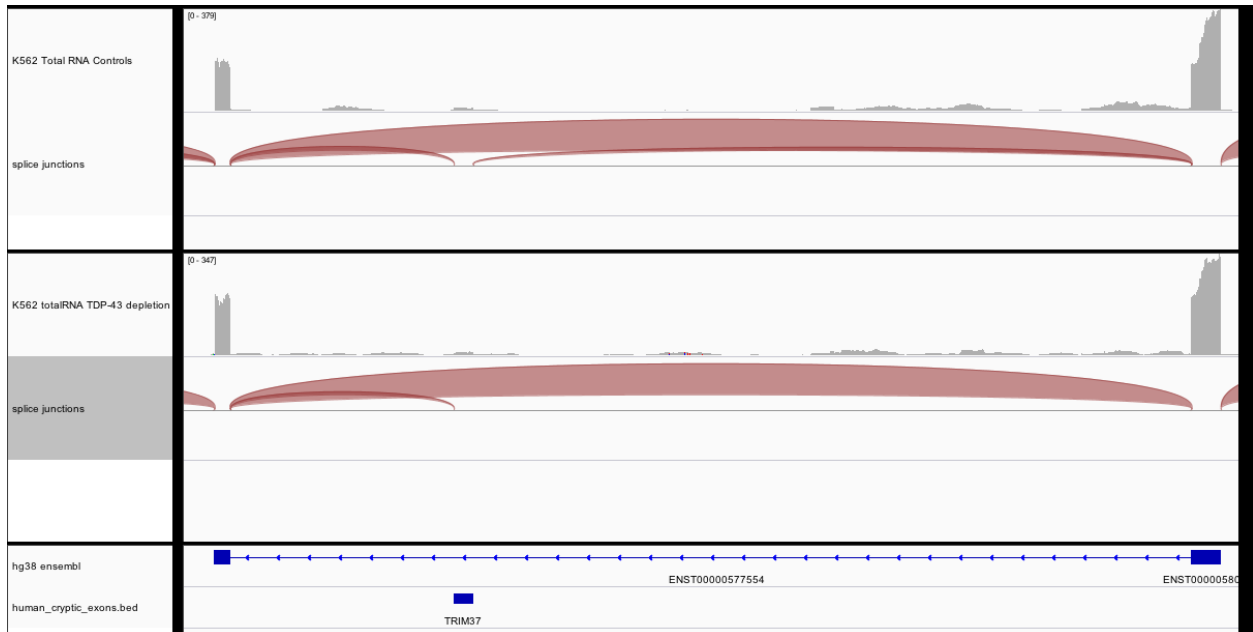

# 81 C4orf32 E001i1

## Human K562 mRNA

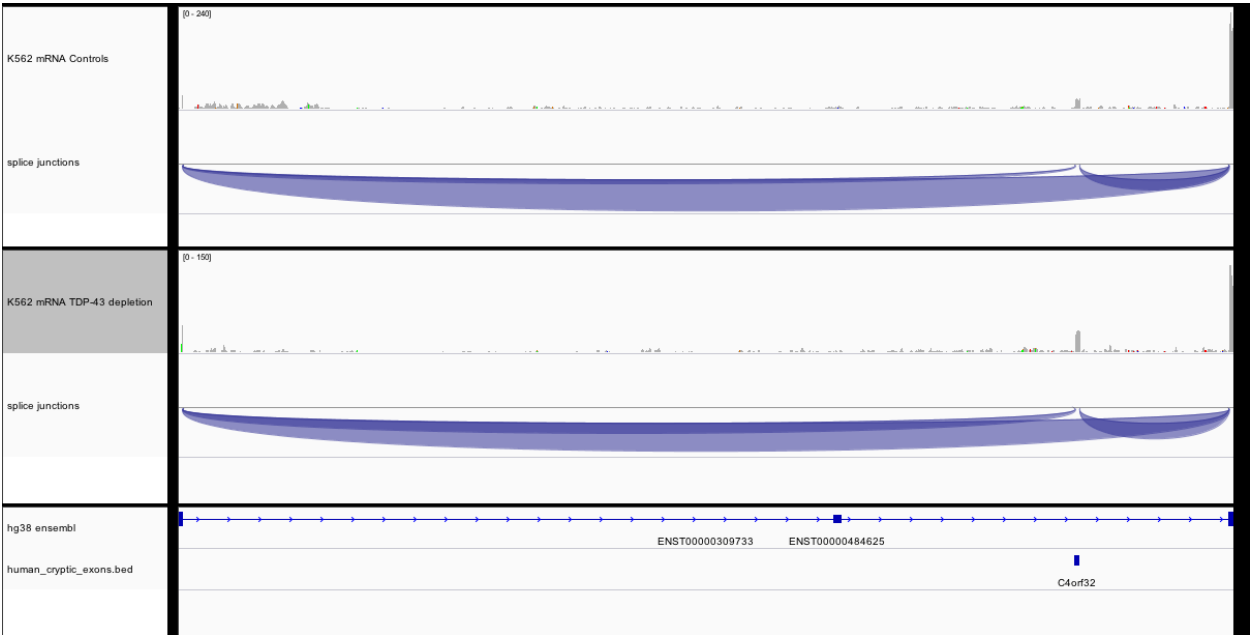

## Human K562 total RNA

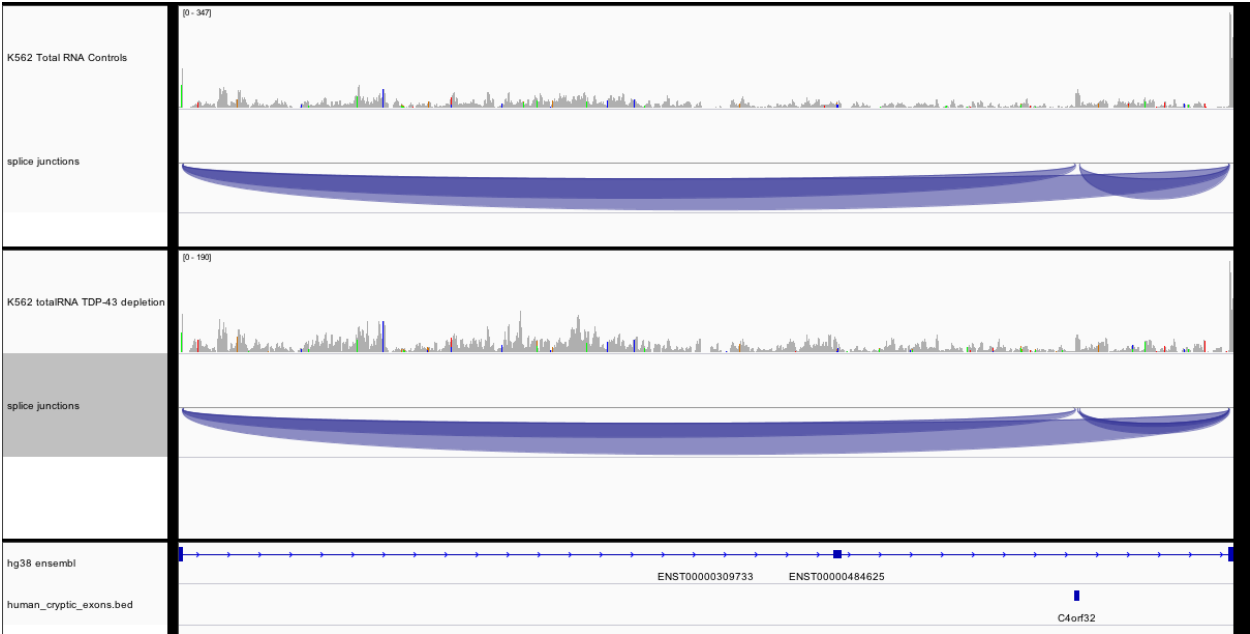

# 82 ZCCHC6 E004i1

## Human K562 mRNA

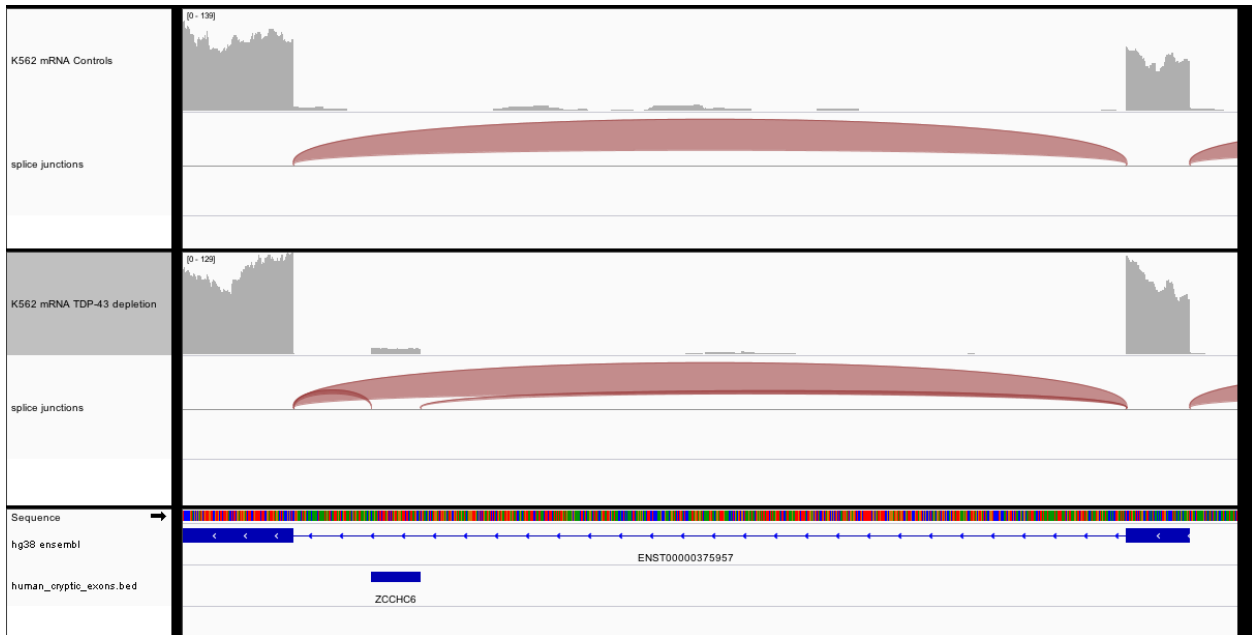

## Human K562 total RNA

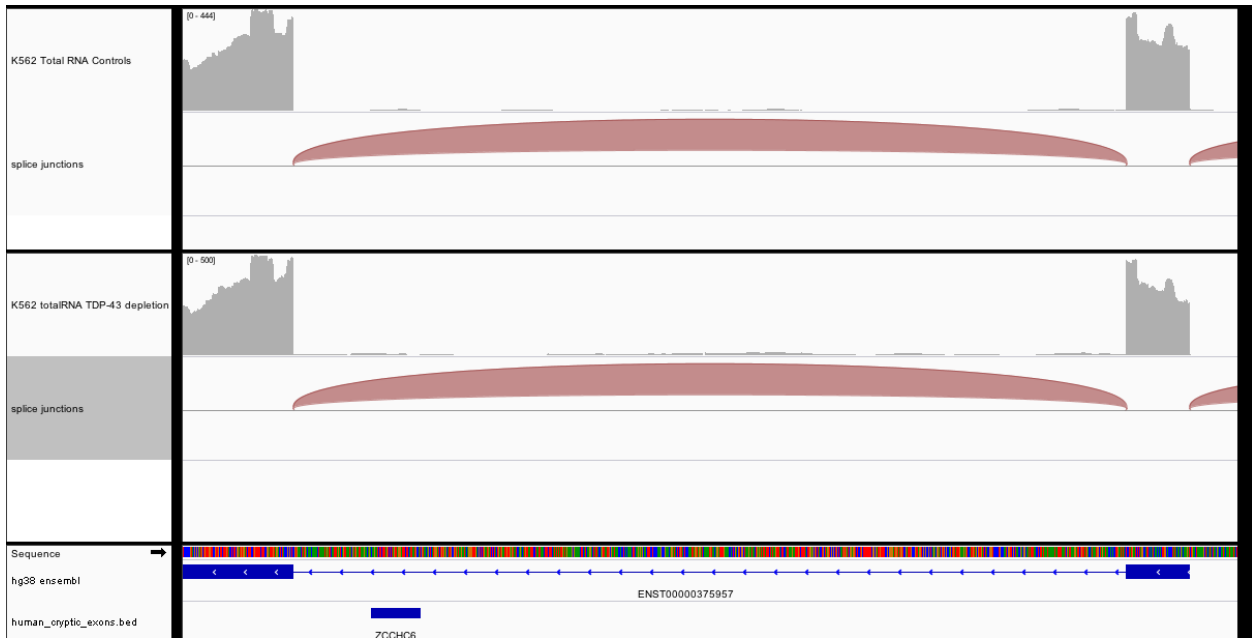

# 83 ANKRD26 E045i1

Human K562 mRNA

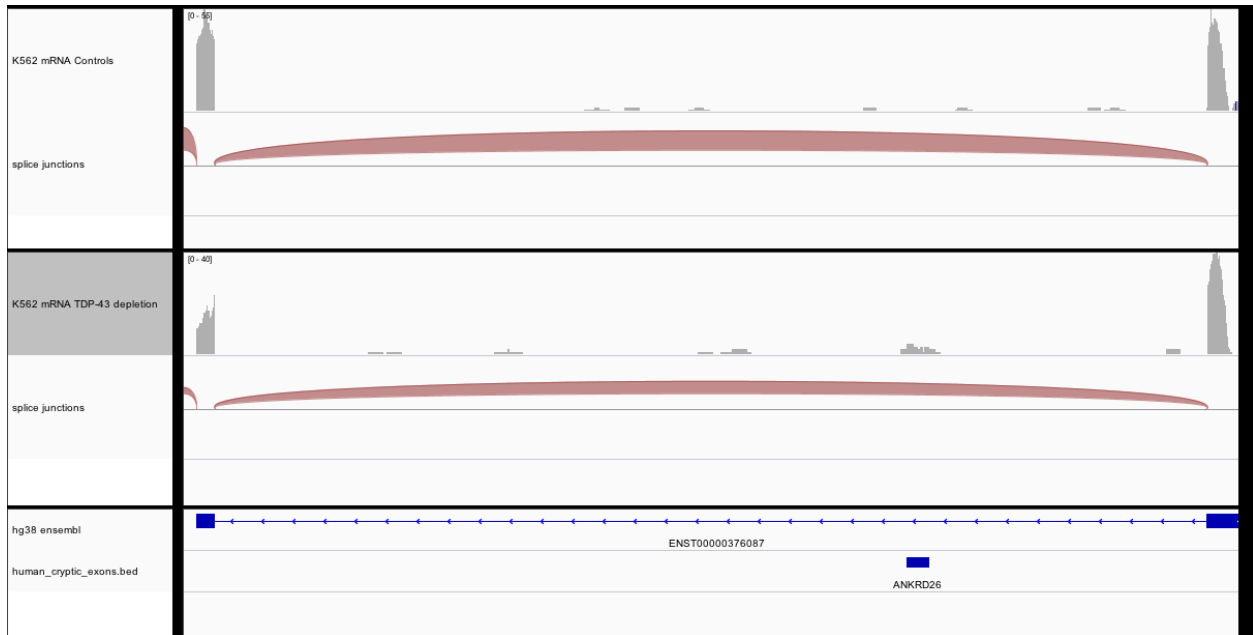

Human K562 total RNA

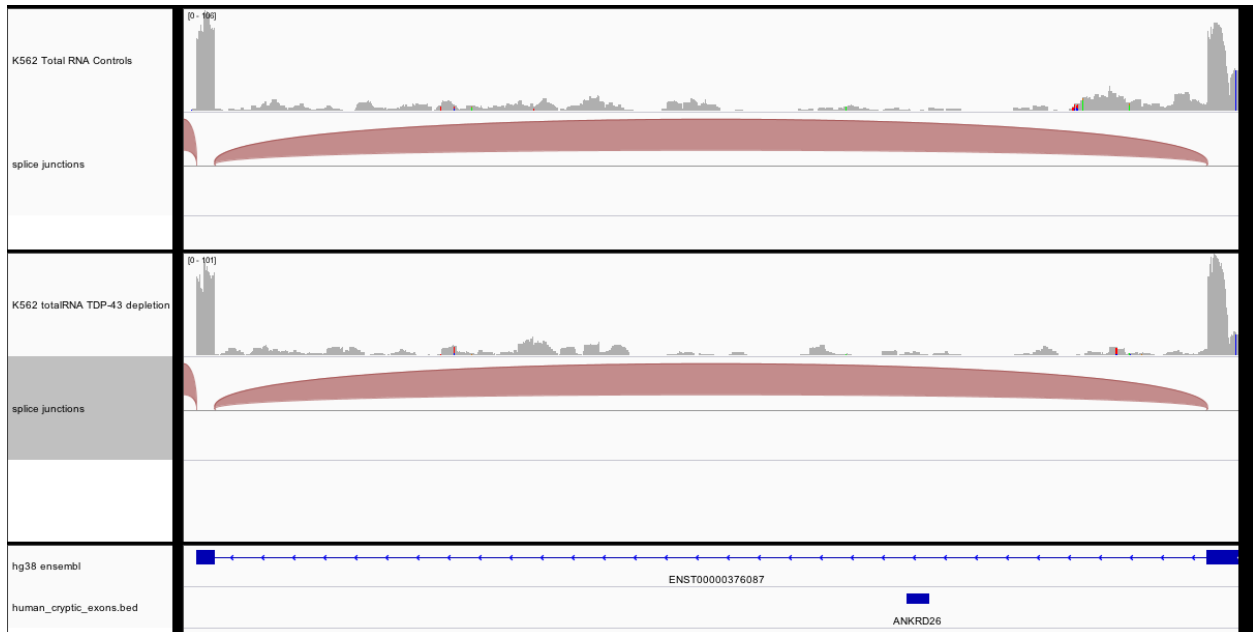

# 84 KIAA1429 E039i3

## Human K562 mRNA

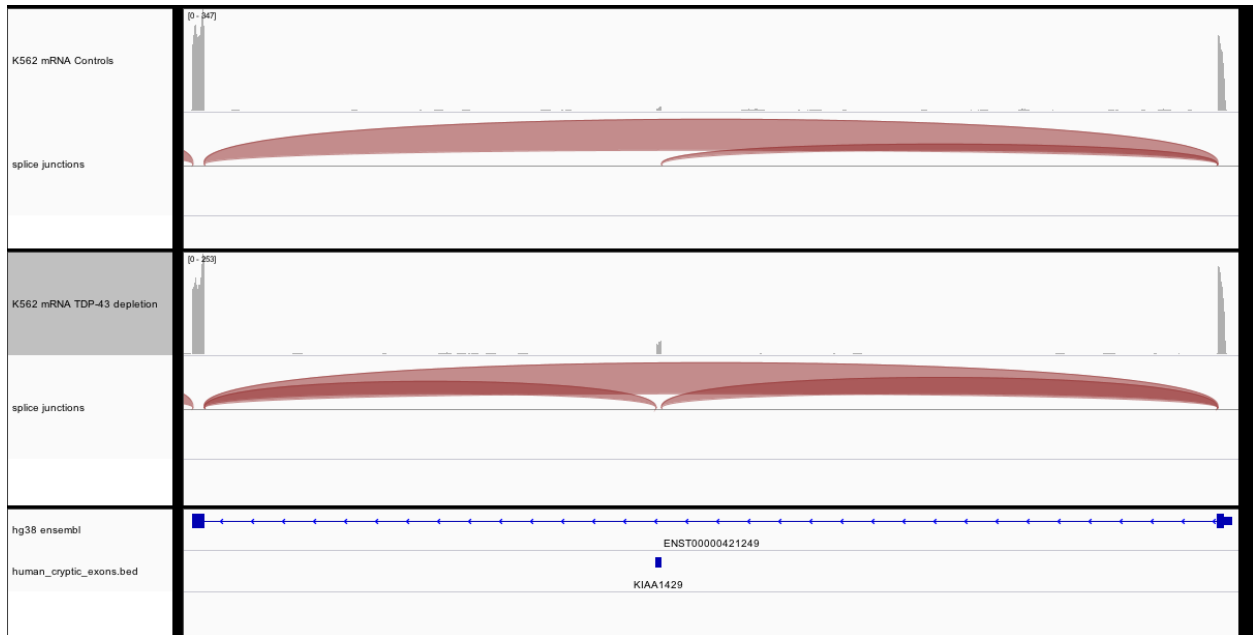

## Human K562 total RNA

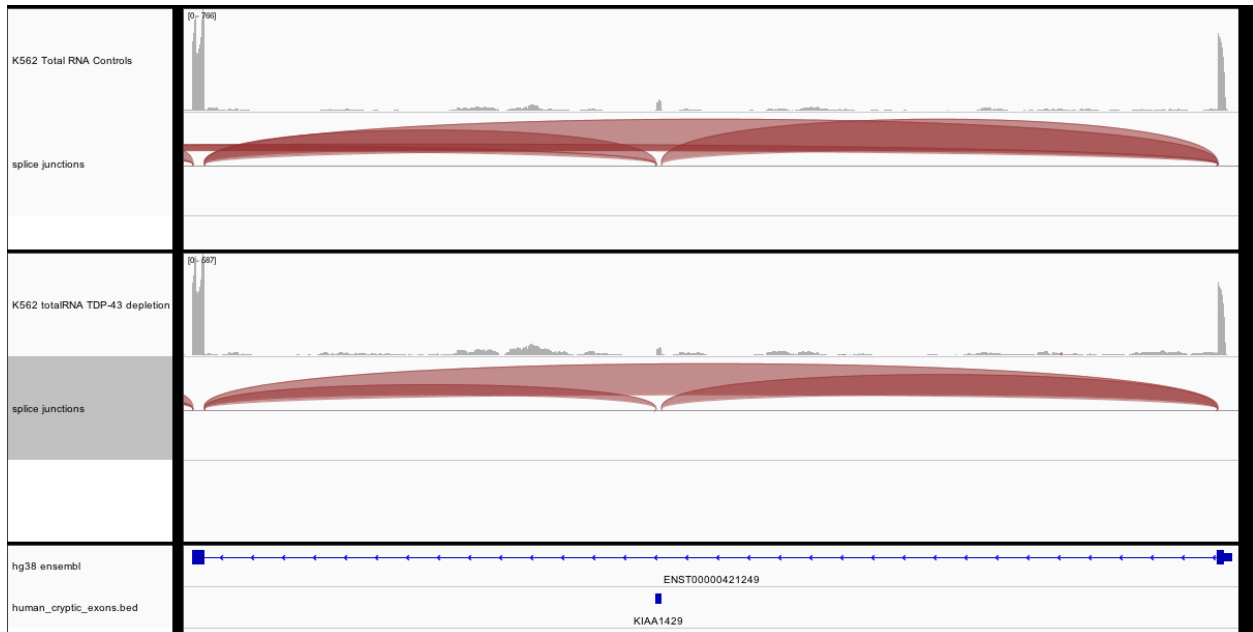

# 85 ZFYVE27 E020i1

## Human K562 mRNA

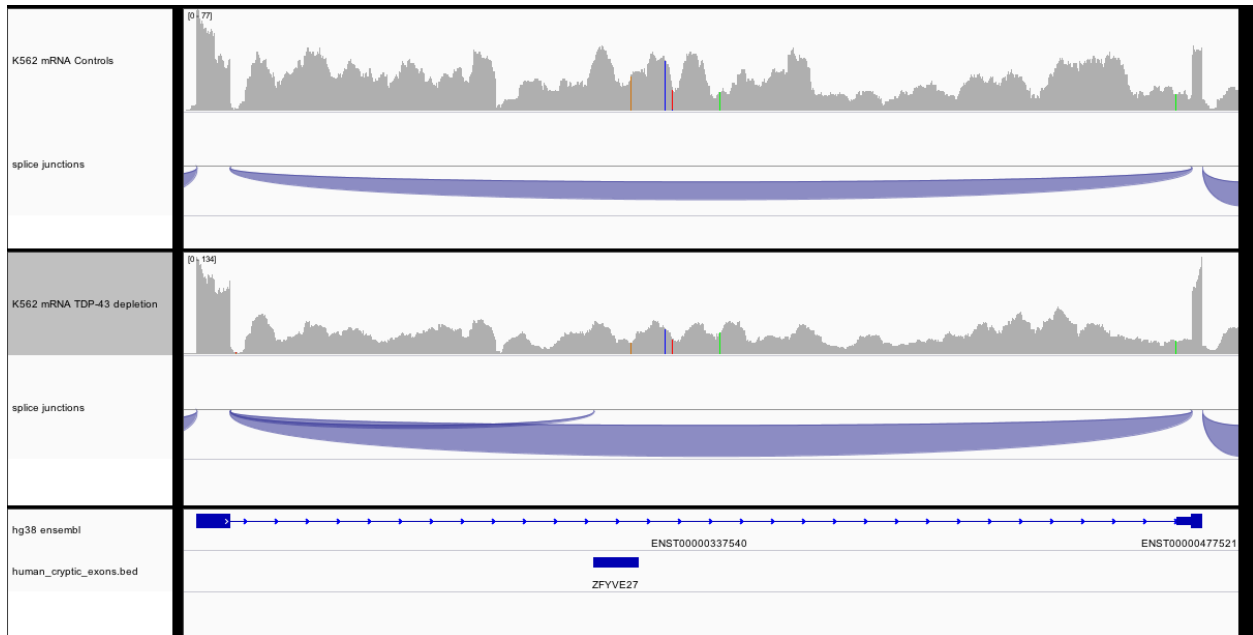

## Human K562 total RNA

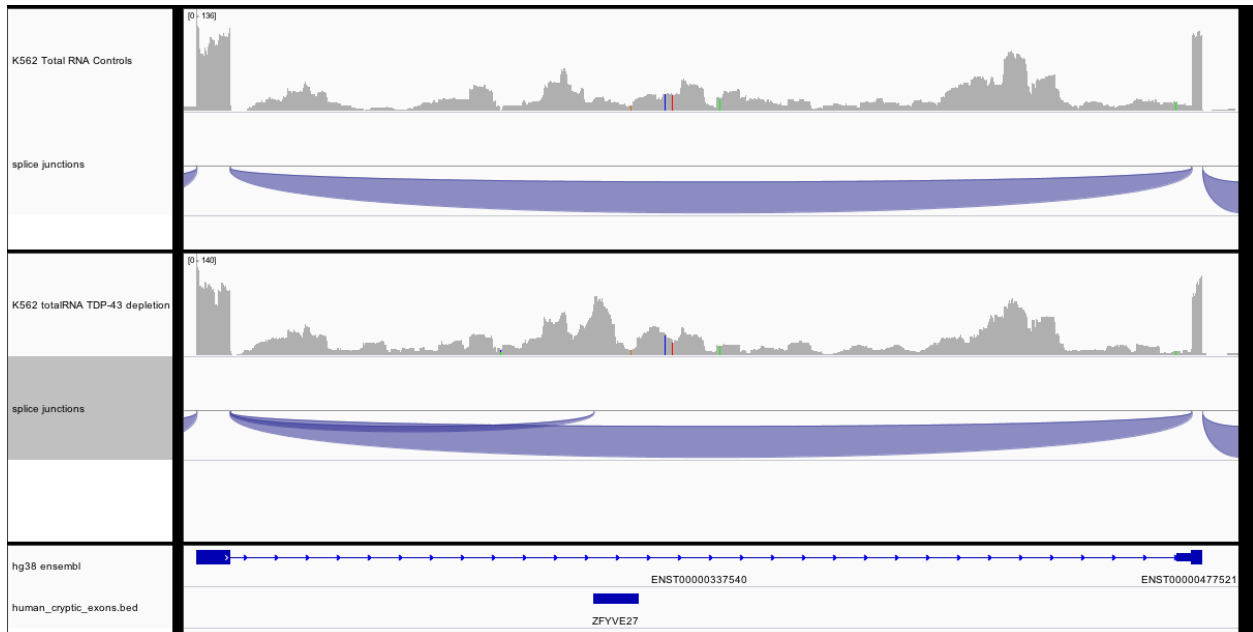

# 86 MYO16 E036i1

## Human K562 mRNA

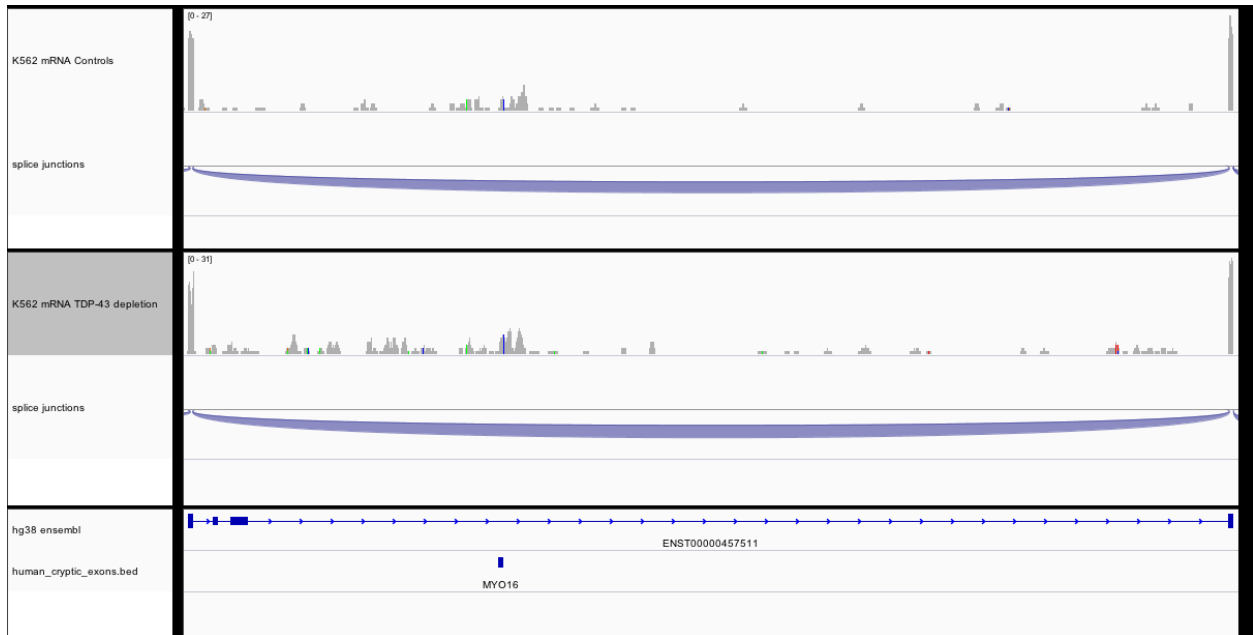

## Human K562 total RNA

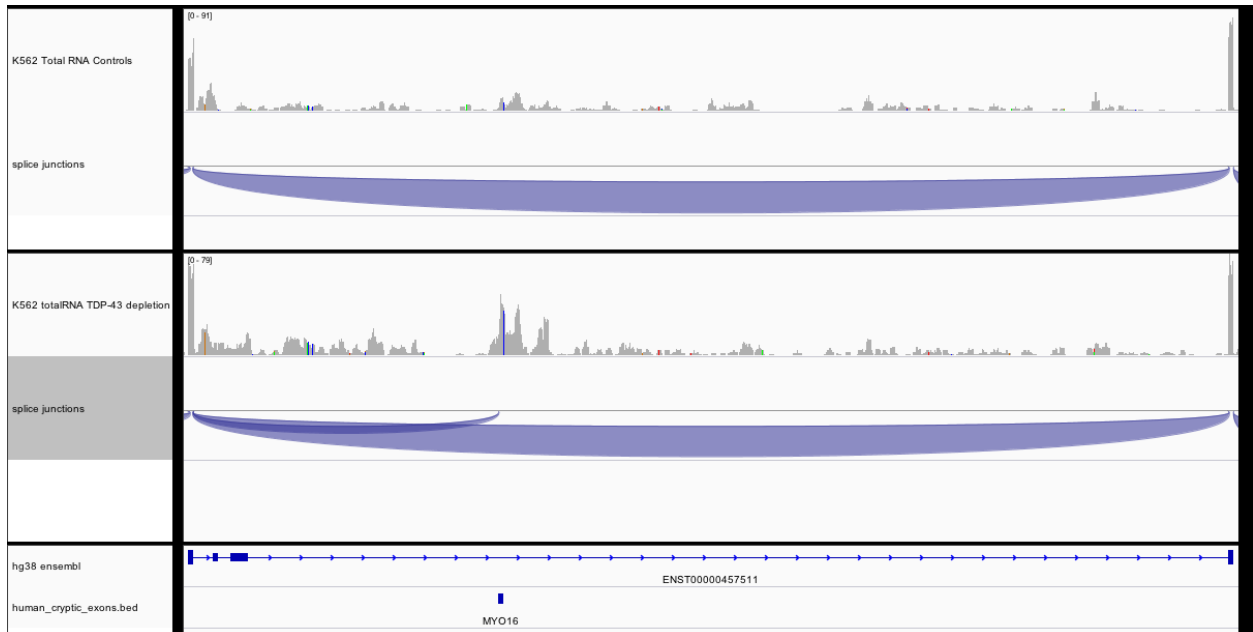

# 87 INPP5A E009i1

## Human K562 mRNA

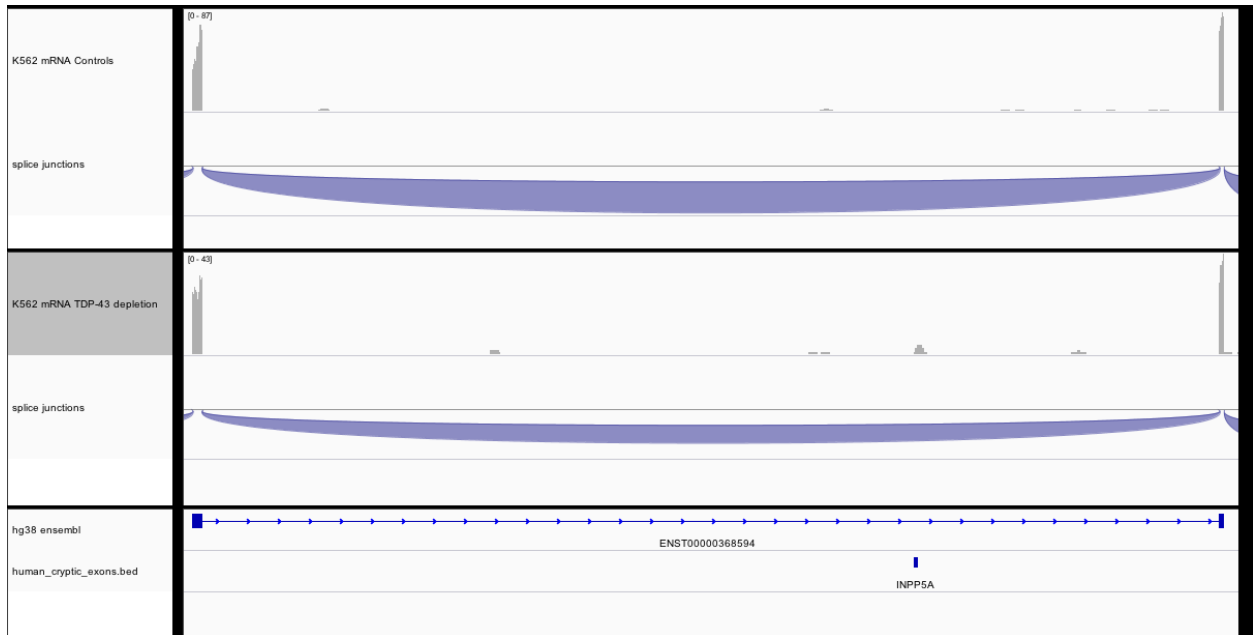

## Human K562 total RNA

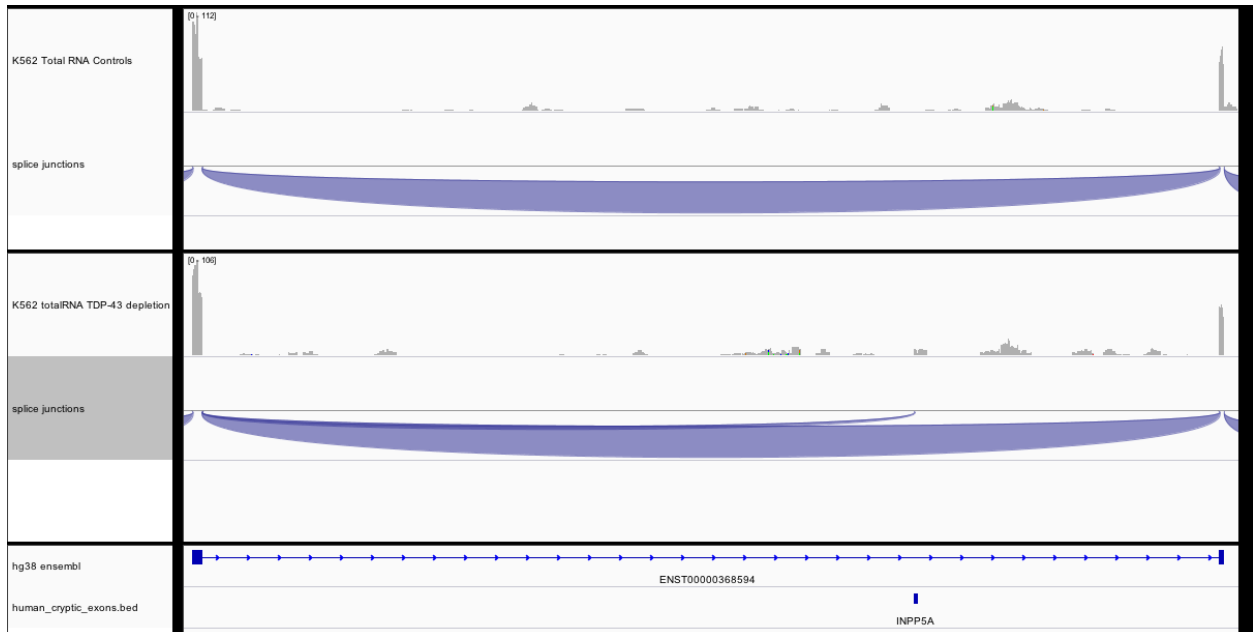



# 88 SCP2 E024i1

## Human K562 mRNA

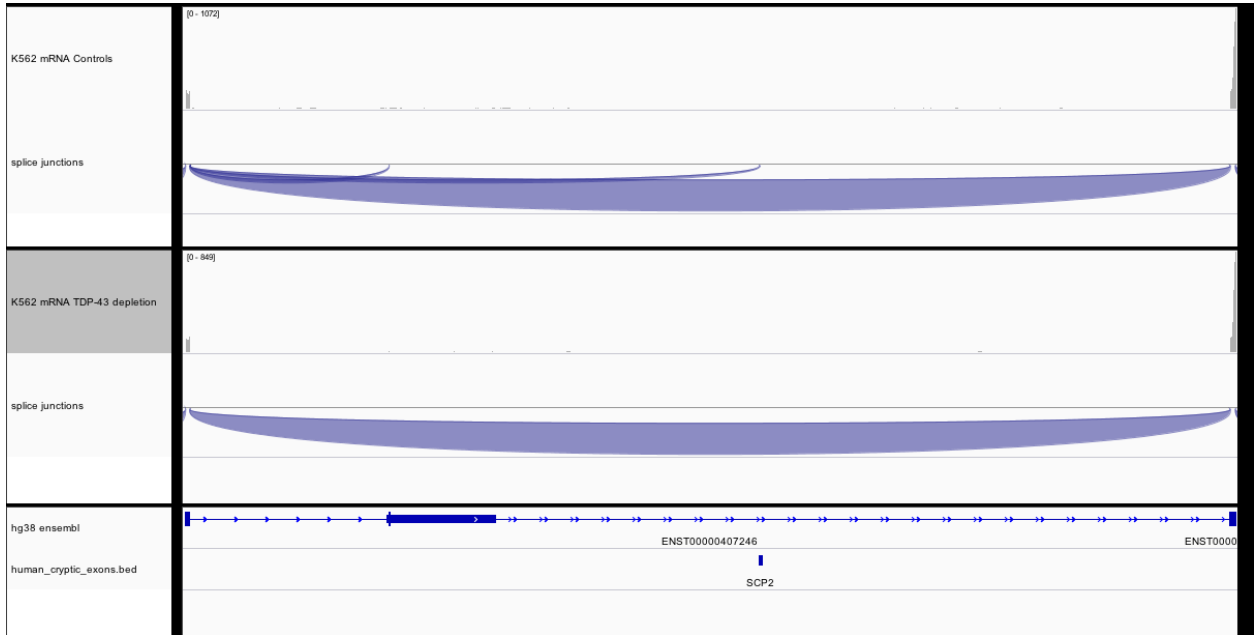

## Human K562 total RNA

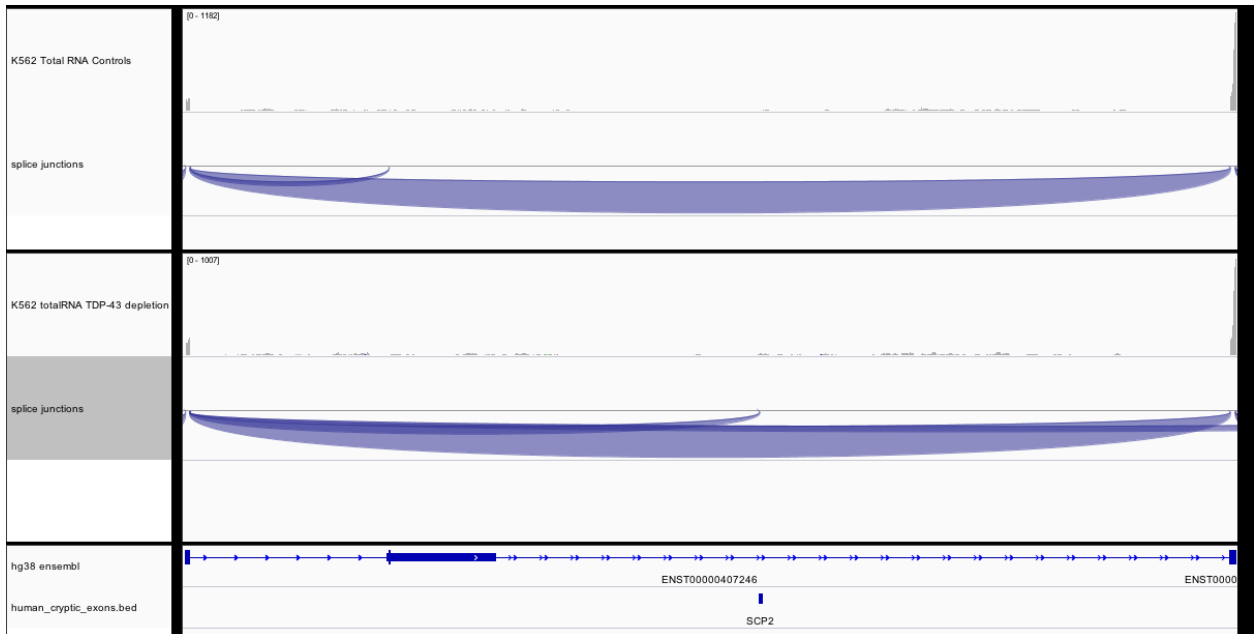

# 89 DEAF1 E006i2

## Human K562 mRNA

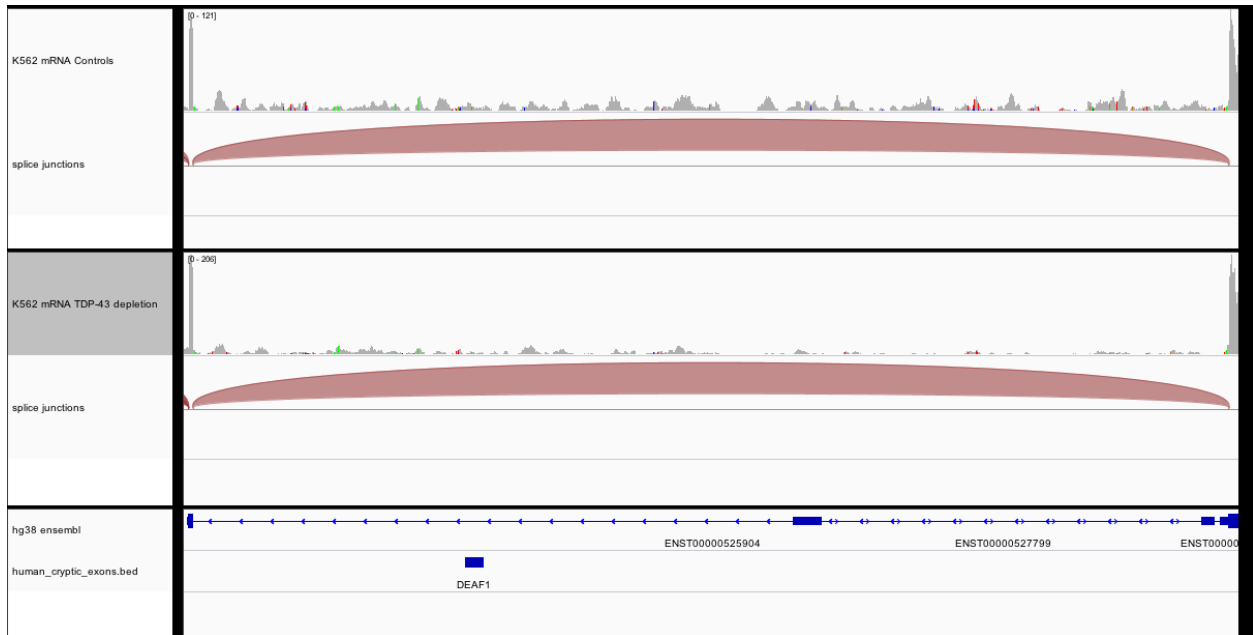

## Human K562 total RNA

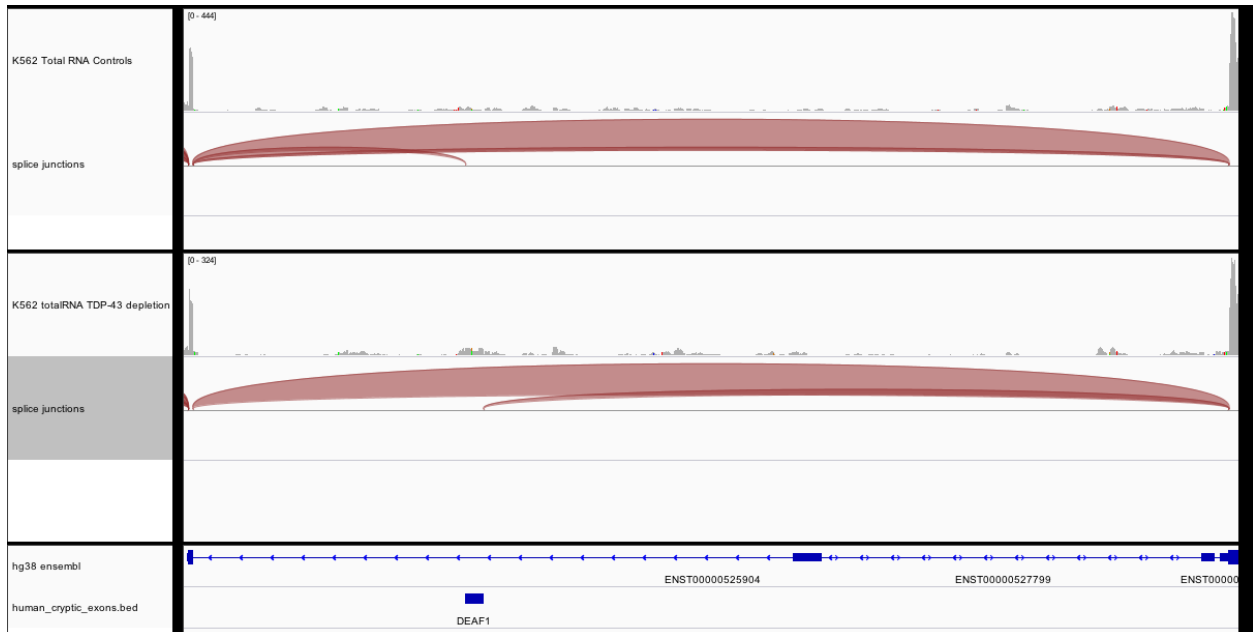

# 90 0 E012i1

## Human K562 mRNA

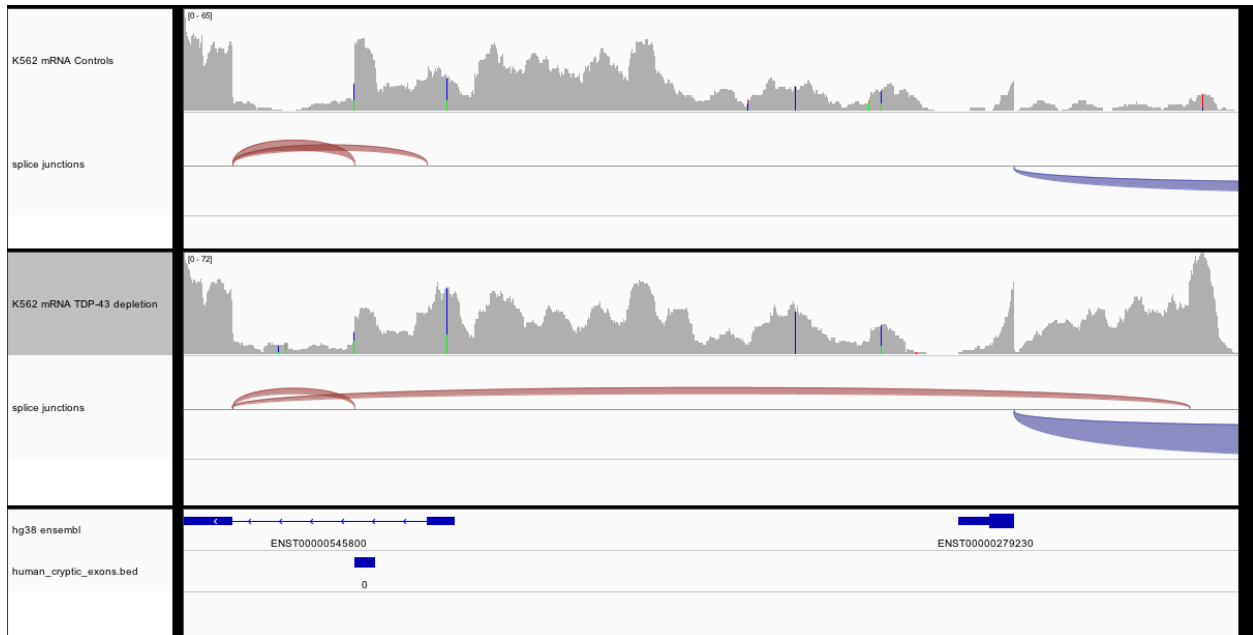

## Human K562 total RNA

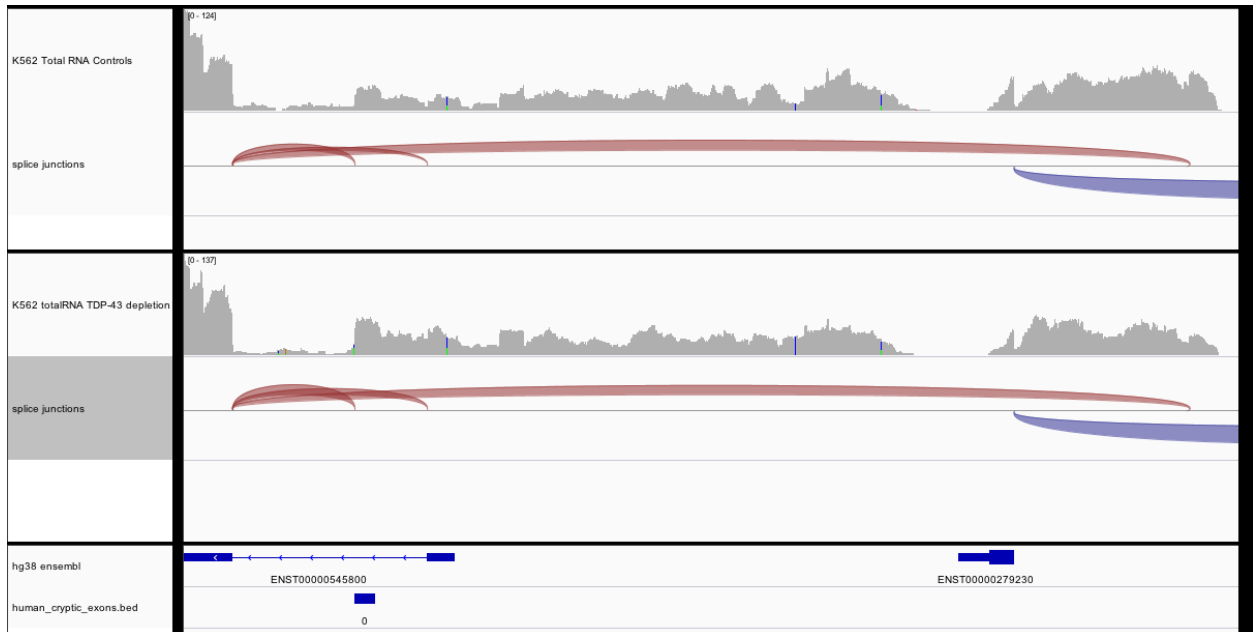

# 91 SLC19A1 E028i1

## Human K562 mRNA

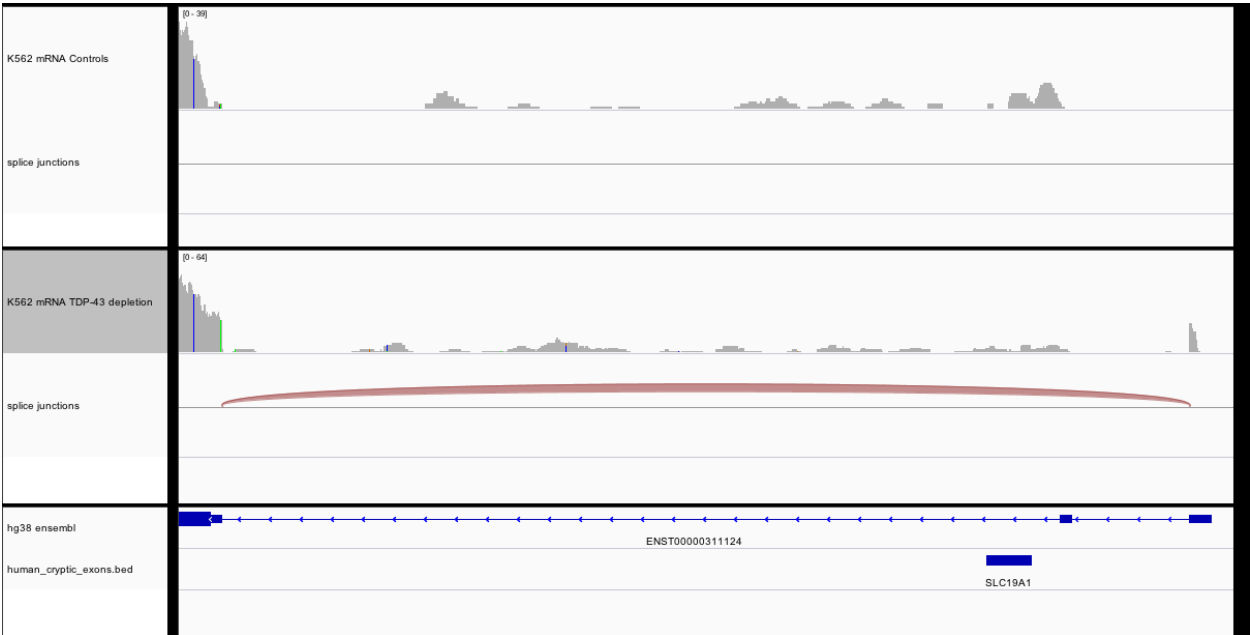

## Human K562 total RNA

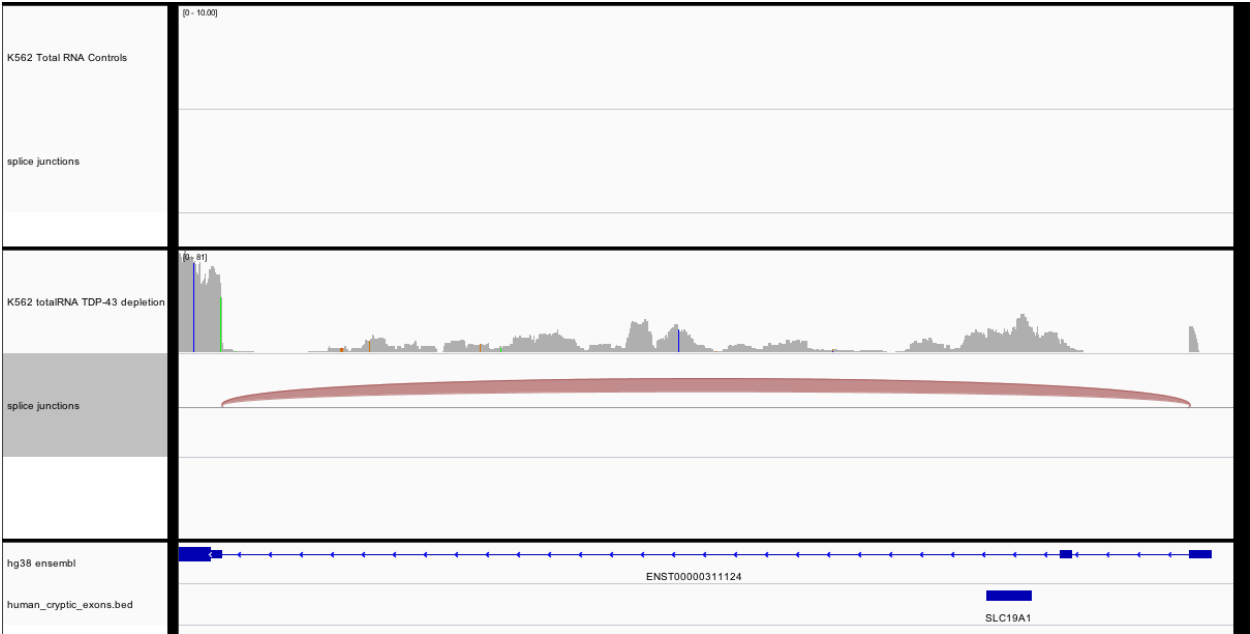

# 92 HNRNPH3 E009i1

## Human K562 mRNA

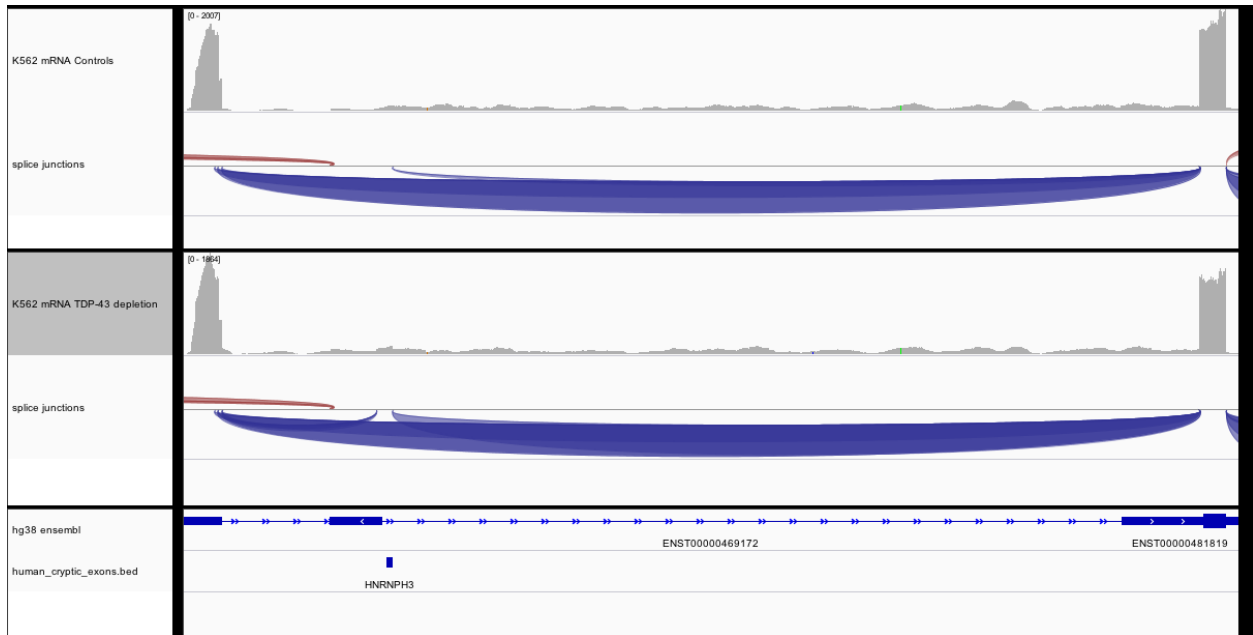

## Human K562 total RNA

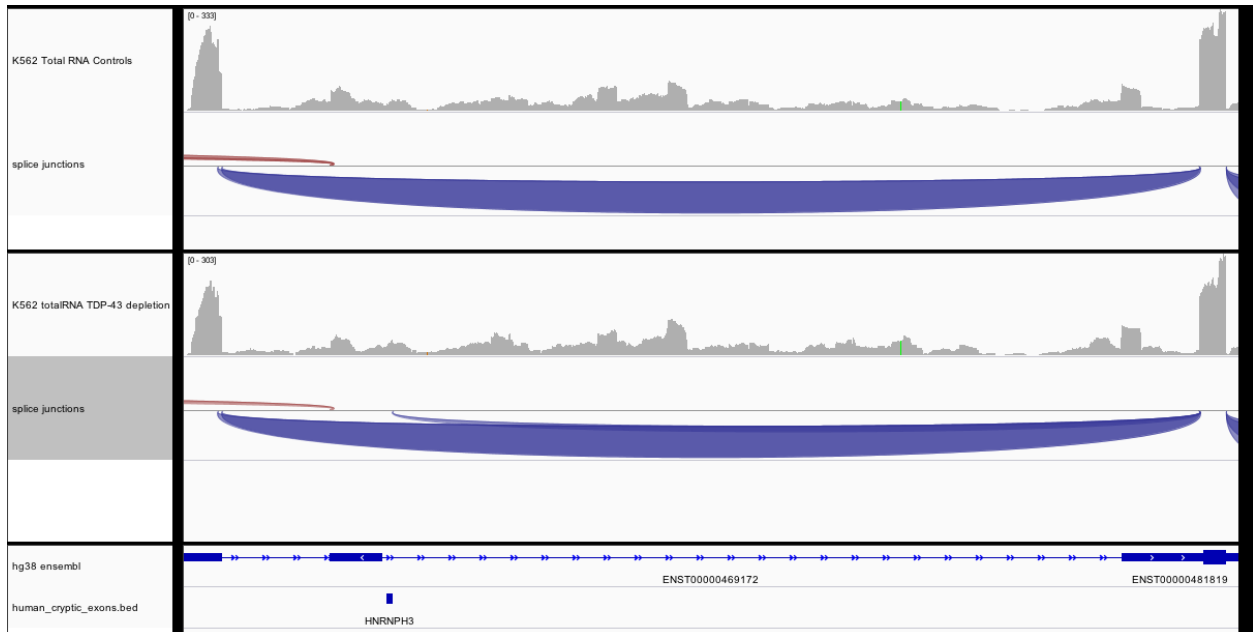

# 93 SLC39A8 E016i2

## Human K562 mRNA

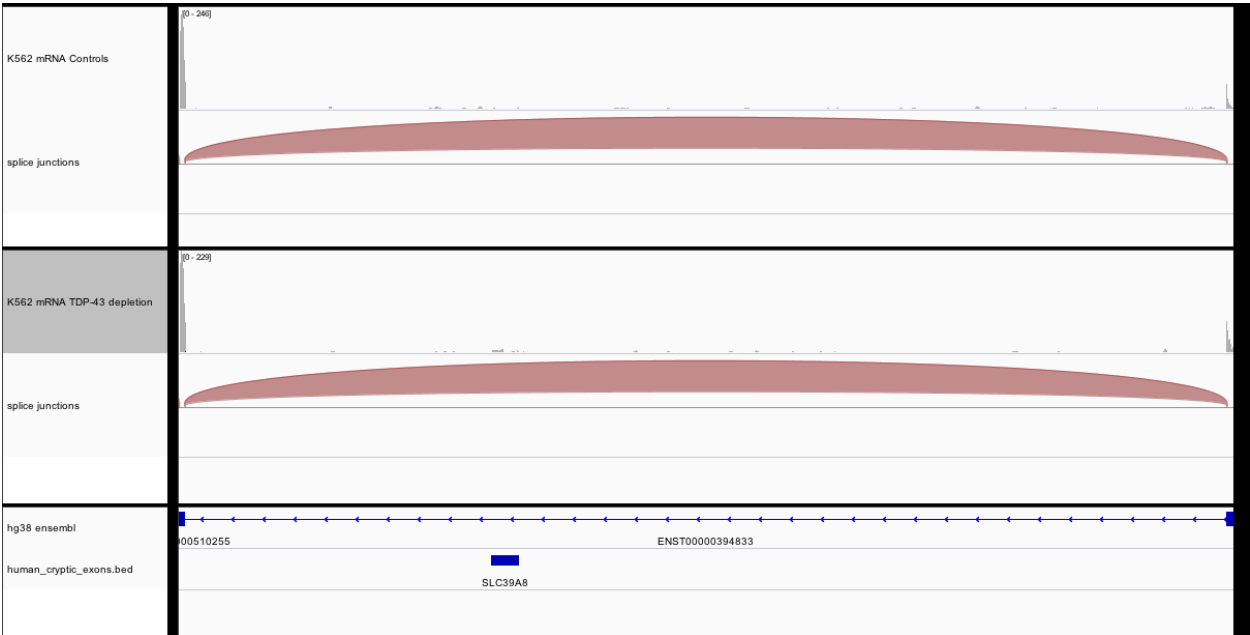

## Human K562 total RNA

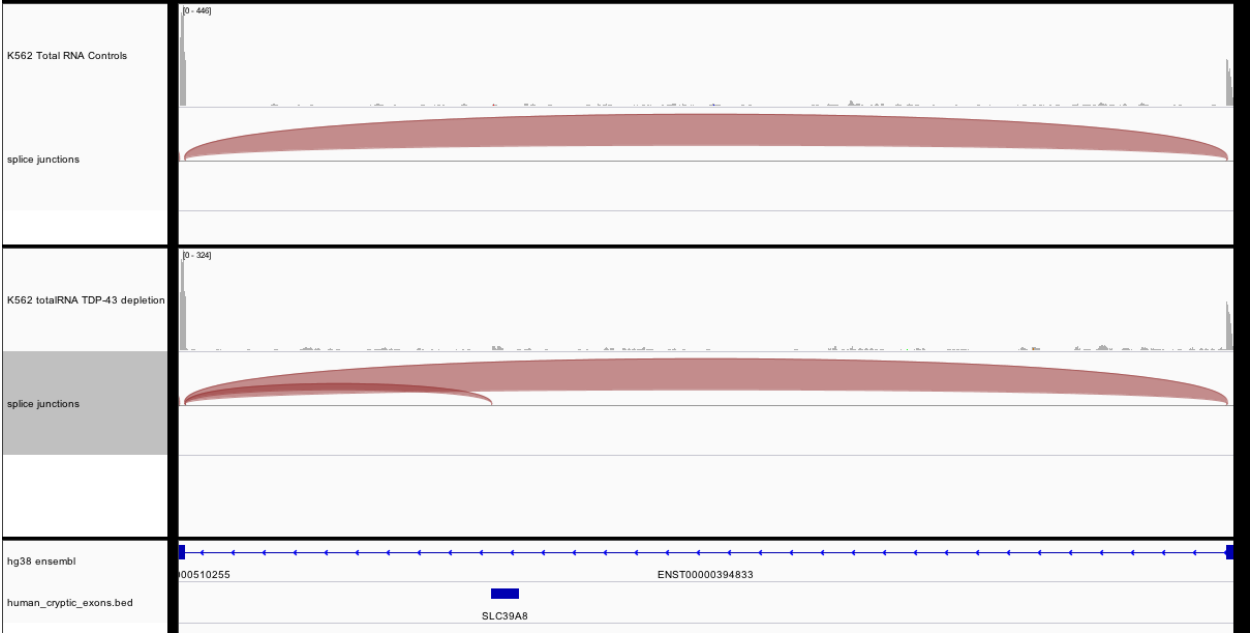

# 94 DSC2 E017i1

## Human K562 mRNA

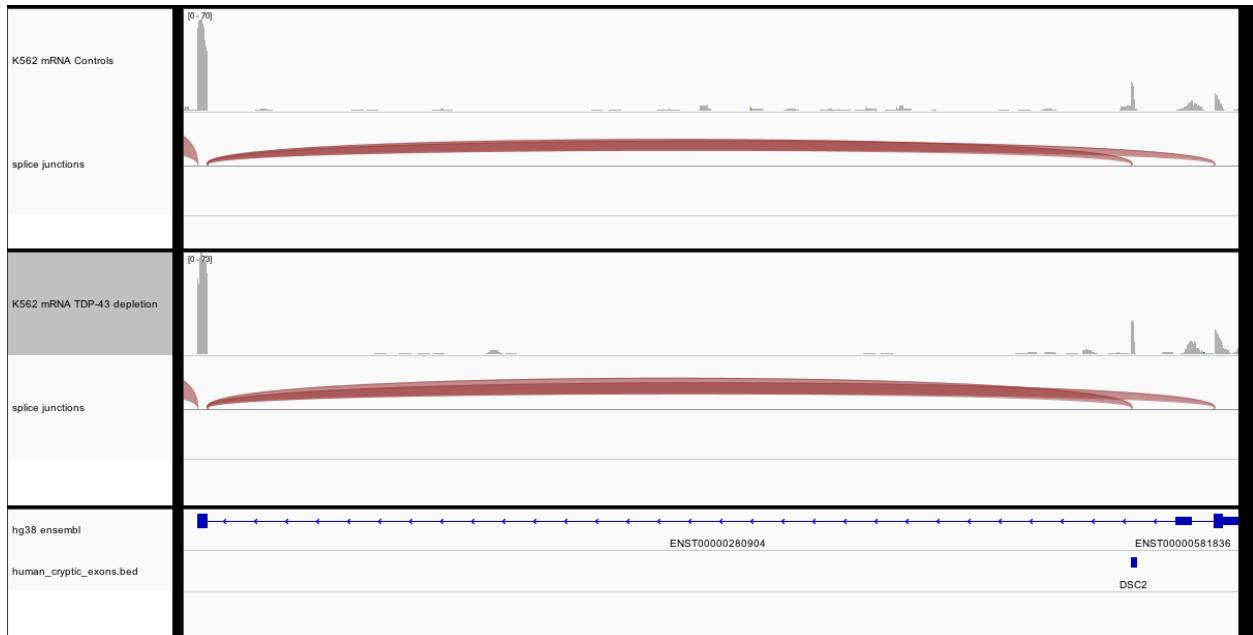

## Human K562 total RNA

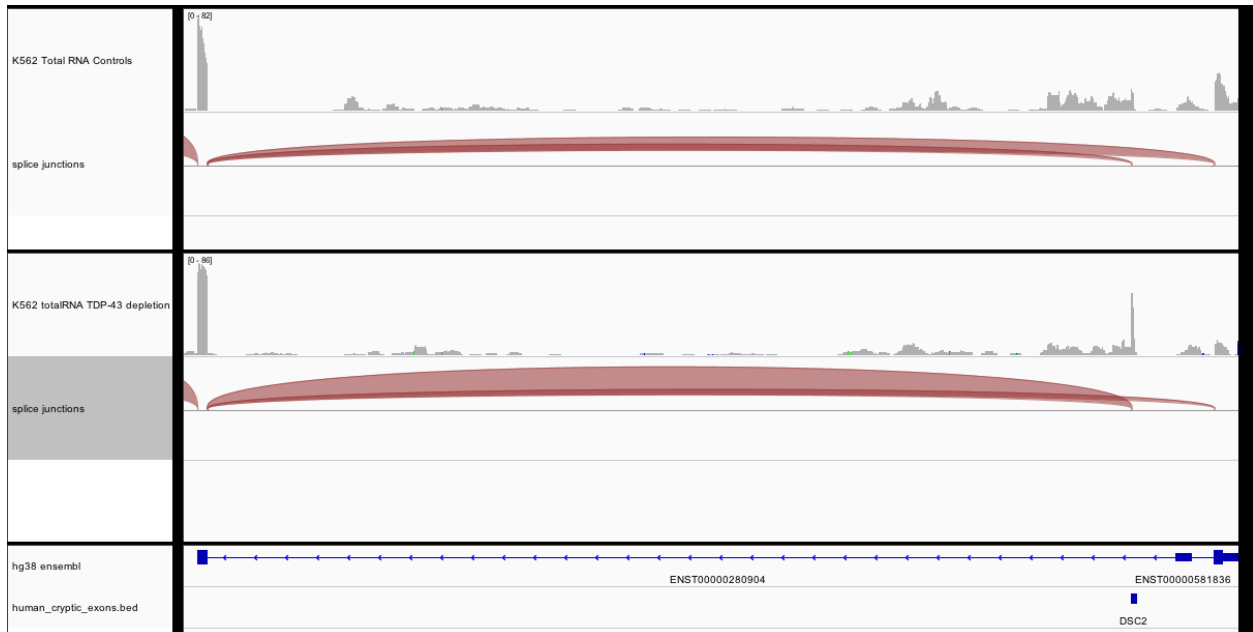

# 95 ANXA3 E023i1

## Human K562 mRNA

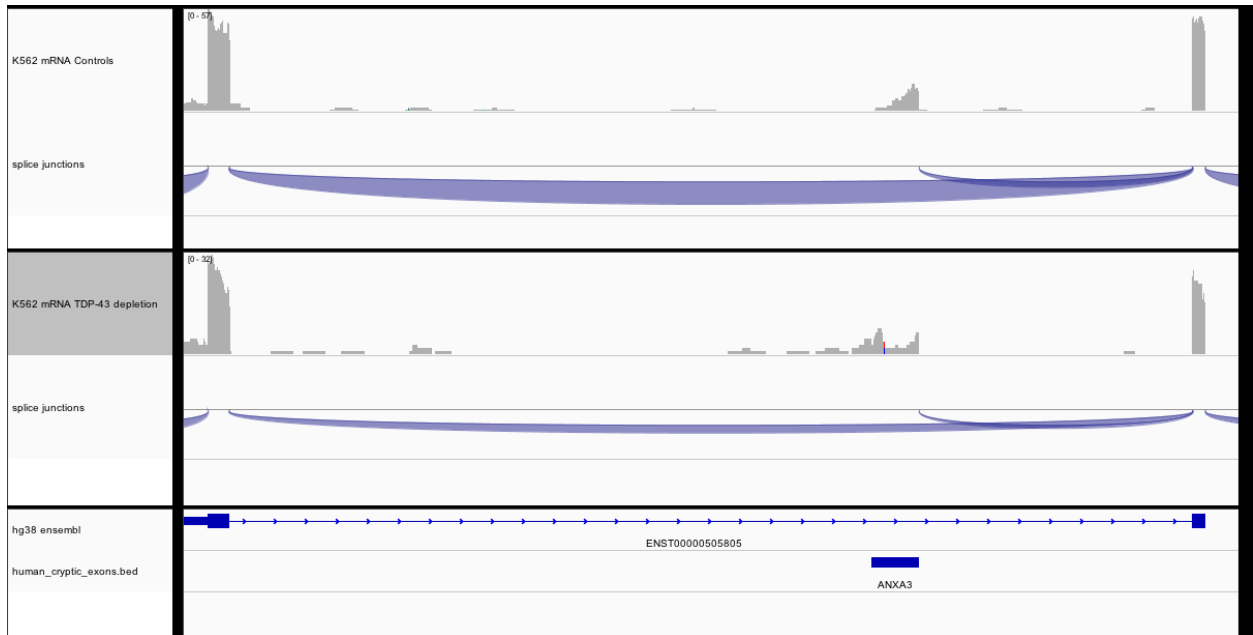

## Human K562 total RNA

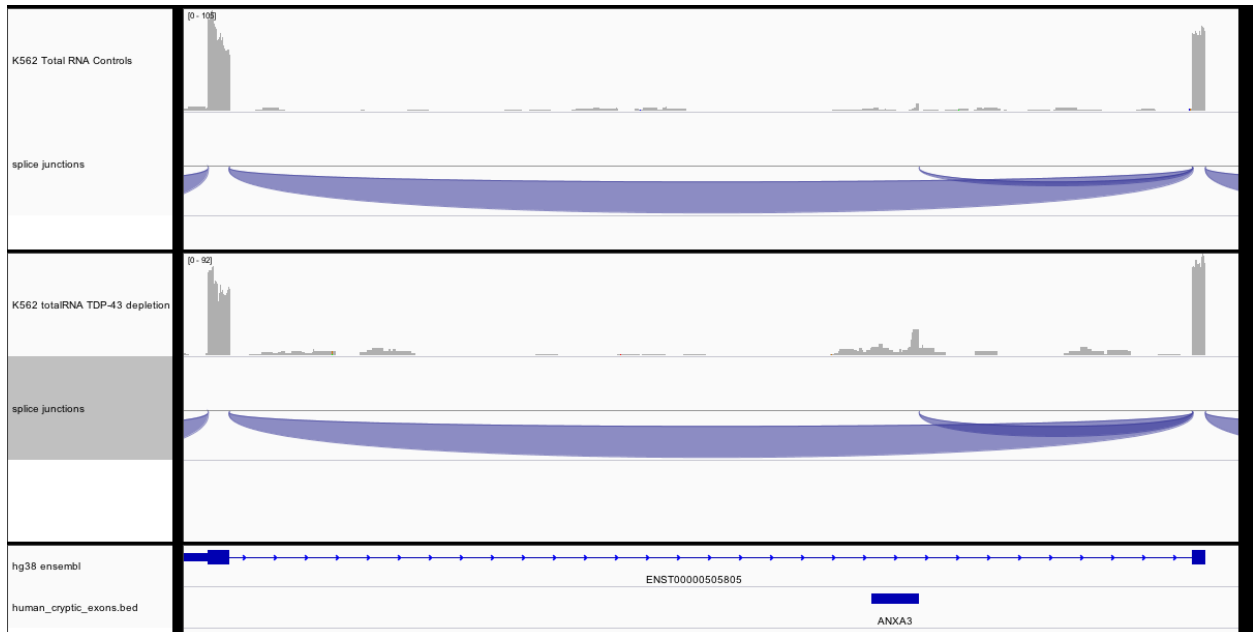

Supplement: 12920_2017_274_MOESM3_ESM.pdf [file 12920_2017_274_MOESM3_ESM.pdf]
