# Supplementary material for: Quantitative analysis of cryptic splicing associated with TDP-43 depletion
Source: PubMed Central journal article supplement (PMC5446763; doi:10.1186/s12920-017-0274-1), 2017-05-26
Supplement: 12920_2017_274_MOESM5_ESM.pdf [file 12920_2017_274_MOESM5_ESM.pdf]

Table S5:  
 Mouse cryptic exon inclusion rates in other mouse tissues from *Merkin et al, 2012*

| Tissue (samples) | <i>Reep3</i><br>E001i1 |             | <i>Adipor2</i><br>E010i2 |              | <i>Elmod1</i><br>E003i2 |           | <i>Thoc7</i><br>E007i1 |             |
|------------------|------------------------|-------------|--------------------------|--------------|-------------------------|-----------|------------------------|-------------|
|                  | 5'                     | 3'          | 5'                       | 3'           | 5'                      | 3'        | 5'                     | 3'          |
| brain (3)        | 0                      | 0           | 0.074±0.047              | 0            | 0.17±0.26               | 0.11±0.09 | 0.59±0.29              | 0.44±0.17   |
| colon (3)        | 0                      | 0.048±0.043 | 0.028±0.01               | 0            | 0                       | 0         | 0.14±0.063             | 0.094±0.013 |
| heart (2)        | 0                      | 0           | 0                        | 0            | 0                       | 0         | 0                      | 0           |
| kidney (3)       | 0                      | 0           | 0                        | 0            | 0                       | 0         | 0.25±0.091             | 0.2±0.074   |
| liver (2)        | 0                      | 0.06±0.049  | 0.017±0.0067             | 0.007±0.0028 | 0                       | 0         | 0.21±0.018             | 0.14±0.024  |
| lung (3)         | 0                      | 0           | 0                        | 0            | 0                       | 0         | 0.16±0.18              | 0.13±0.051  |
| muscle (2)       | 0                      | 0           | 0                        | 0            | 0                       | 0         | 0.32±0.27              | 0.17±0.0023 |
| spleen (3)       | 0                      | 0           | 0                        | 0            | 0                       | 0         | 0.1±0.077              | 0           |
| testes (3)       | 0                      | 0           | 0.086±0.083              | 0            | 0                       | 0         | 1.2±0.48               | 0.53±0.21   |

Table S6:  
Human cryptic exon inclusion rates in other human tissues from the GTEx project

| Tissue (samples)                          | <i>MPDZ</i><br>E015i1 |              | <i>UHRF2</i><br>E017i2 |             | <i>DEAF1</i><br>E006i2 |               |
|-------------------------------------------|-----------------------|--------------|------------------------|-------------|------------------------|---------------|
|                                           | 5'                    | 3'           | 5'                     | 3'          | 5'                     | 3'            |
| adipose subcutaneous (239)                | 0                     | 0.023±0.074  | 0.15±0.12              | 0.12±0.095  | 0.011±0.018            | 0.0069±0.013  |
| adipose visceral (165)                    | 0                     | 0.02±0.08    | 0.12±0.13              | 0.12±0.15   | 0.013±0.024            | 0.0068±0.013  |
| adrenal gland (97)                        | 0                     | 0.0076±0.021 | 0.087±0.098            | 0.057±0.074 | 0.021±0.026            | 0.011±0.013   |
| artery aorta (158)                        | 0                     | 0.016±0.087  | 0.085±0.09             | 0.079±0.09  | 0.012±0.019            | 0.0062±0.011  |
| artery coronary (89)                      | 0                     | 0.0061±0.016 | 0.11±0.1               | 0.11±0.12   | 0.0079±0.012           | 0.003±0.0072  |
| artery tibial (221)                       | 0                     | 0.015±0.077  | 0.11±0.1               | 0.085±0.091 | 0.0062±0.015           | 0.0033±0.0088 |
| brain amygdala (61)                       | 0                     | 0.011±0.071  | 0.054±0.15             | 0           | 0.0024±0.0038          | 0.0018±0.0029 |
| brain anterior cingulate cortex (72)      | 0                     | 0.0072±0.037 | 0                      | 0.033±0.054 | 0.0011±0.0017          | 0.0016±0.0017 |
| brain caudate (94)                        | 0                     | 0.01±0.049   | 0.03±0.059             | 0.01±0.036  | 0.0019±0.0029          | 0.002±0.0028  |
| brain cerebellar hemisphere (84)          | 0                     | 0.036±0.17   | 0.014±0.028            | 0.083±0.087 | 0.013±0.011            | 0.0081±0.0067 |
| brain cerebellum (108)                    | 0                     | 0.052±0.28   | 0.021±0.05             | 0.093±0.089 | 0.015±0.027            | 0.008±0.012   |
| brain cortex (98)                         | 0                     | 0.018±0.11   | 0.018±0.042            | 0.045±0.09  | 0±0.003                | 0±0.0038      |
| brain frontal cortex (89)                 | 0                     | 0.014±0.071  | 0                      | 0.02±0.036  | 0                      | 0.0014±0.0021 |
| brain hippocampus (76)                    | 0                     | 0.017±0.099  | 0.012±0.03             | 0.012±0.04  | 0.0016±0.0029          | 0.0018±0.0029 |
| brain hypothalamus (76)                   | 0                     | 0.013±0.061  | 0.0053±0.017           | 0.03±0.056  | 0.0073±0.0087          | 0.0047±0.0057 |
| brain nucleus accumbens (89)              | 0                     | 0.0063±0.035 | 0.0061±0.02            | 0.023±0.048 | 0.002±0.0038           | 0.0026±0.0035 |
| brain putamen (76)                        | 0                     | 0.017±0.086  | 0                      | 0.019±0.038 | 0.0026±0.0059          | 0.0021±0.0038 |
| brain spinal cord (58)                    | 0                     | 0.009±0.022  | 0.018±0.035            | 0.059±0.089 | 0.0049±0.011           | 0.0054±0.008  |
| brain substantia nigra (52)               | 0                     | 0.026±0.11   | 0                      | 0.037±0.065 | 0.011±0.016            | 0.0042±0.007  |
| breast mammary tissue (136)               | 0                     | 0.018±0.054  | 0.16±0.15              | 0.13±0.11   | 0.018±0.039            | 0.012±0.019   |
| cells ebv-transformed lymphocytes (57)    | 0                     | 0            | 0.18±0.11              | 0.19±0.11   | 0.022±0.027            | 0.012±0.015   |
| cells transformed fibroblasts (157)       | 0                     | 0.024±0.081  | 0.061±0.058            | 0.055±0.055 | 0.022±0.028            | 0.016±0.021   |
| colon sigmoid (108)                       | 0                     | 0.017±0.085  | 0.092±0.092            | 0.084±0.085 | 0.01±0.019             | 0.0029±0.0073 |
| colon transverse (132)                    | 0                     | 0.0081±0.018 | 0.13±0.16              | 0.12±0.13   | 0.015±0.027            | 0.0075±0.019  |
| esophagus gastroesophageal junction (119) | 0                     | 0.021±0.12   | 0.1±0.12               | 0.084±0.097 | 0.0061±0.012           | 0.0026±0.007  |
| esophagus mucosa (185)                    | 0                     | 0.014±0.045  | 0.13±0.12              | 0.1±0.11    | 0.039±0.05             | 0.013±0.02    |
| esophagus muscularis (154)                | 0                     | 0.018±0.069  | 0.074±0.079            | 0.062±0.07  | 0.0074±0.016           | 0.0057±0.011  |
| heart atrial appendage (149)              | 0                     | 0.011±0.028  | 0.053±0.081            | 0.049±0.077 | 0.0086±0.022           | 0.0044±0.011  |
| heart left ventricle (149)                | 0                     | 0.013±0.034  | 0.05±0.072             | 0.043±0.068 | 0.0087±0.019           | 0.0054±0.015  |
| kidney cortex (22)                        | 0                     | 0            | 0.047±0.073            | 0.077±0.14  | 0.018±0.024            | 0.0094±0.018  |
| liver (82)                                | 0                     | 0.024±0.11   | 0.052±0.069            | 0.068±0.12  | 0.04±0.066             | 0.011±0.025   |
| lung (233)                                | 0                     | 0.034±0.18   | 0.15±0.15              | 0.13±0.12   | 0.021±0.038            | 0.0063±0.016  |
| minor salivary gland (46)                 | 0                     | 0            | 0.17±0.15              | 0.14±0.13   | 0.017±0.027            | 0.011±0.014   |
| muscle skeletal (305)                     | 0                     | 0.031±0.052  | 0.036±0.069            | 0.035±0.059 | 0.0037±0.011           | 0.0046±0.014  |
| nerve tibial (219)                        | 0                     | 0.02±0.074   | 0.1±0.092              | 0.089±0.086 | 0.0093±0.016           | 0.0056±0.011  |
| ovary (68)                                | 0                     | 0.01±0.015   | 0.062±0.063            | 0.063±0.067 | 0.0073±0.011           | 0.003±0.007   |
| pancreas (107)                            | 0                     | 0.012±0.033  | 0.13±0.14              | 0.11±0.13   | 0.013±0.026            | 0.0062±0.013  |
| pituitary (90)                            | 0                     | 0.032±0.17   | 0.076±0.11             | 0.054±0.07  | 0.021±0.021            | 0.0092±0.012  |
| prostate (68)                             | 0                     | 0.018±0.072  | 0.11±0.14              | 0.11±0.13   | 0.031±0.053            | 0.01±0.017    |
| skin not sun exposed (195)                | 0                     | 0.018±0.037  | 0.16±0.17              | 0.14±0.13   | 0.015±0.02             | 0.0064±0.011  |
| skin sun exposed (255)                    | 0                     | 0.025±0.073  | 0.16±0.15              | 0.12±0.11   | 0.015±0.02             | 0.0066±0.011  |
| small intestine terminal ileum (56)       | 0                     | 0.009±0.025  | 0.31±0.25              | 0.24±0.22   | 0.033±0.04             | 0.0087±0.016  |
| spleen (73)                               | 0                     | 0.0097±0.03  | 0.16±0.17              | 0.16±0.18   | 0.039±0.038            | 0.011±0.021   |
| stomach (114)                             | 0                     | 0.015±0.069  | 0.13±0.11              | 0.1±0.11    | 0.013±0.018            | 0.0085±0.017  |
| testis (112)                              | 0                     | 0.03±0.042   | 0.11±0.11              | 0.084±0.091 | 0.024±0.037            | 0.011±0.015   |
| thyroid (222)                             | 0                     | 0.018±0.096  | 0.14±0.14              | 0.11±0.12   | 0.016±0.021            | 0.0081±0.011  |
| uterus (56)                               | 0                     | 0.0077±0.012 | 0.073±0.091            | 0.09±0.096  | 0.014±0.027            | 0.0072±0.015  |
| vagina (62)                               | 0                     | 0.0078±0.017 | 0.084±0.075            | 0.086±0.077 | 0.013±0.025            | 0.0062±0.01   |
| whole blood (279)                         | 0                     | 0            | 0.14±0.13              | 0.14±0.15   | 0.093±0.16             | 0.016±0.038   |
