# Supplementary material for: Quantitative analysis of cryptic splicing associated with TDP-43 depletion
Source: PubMed Central journal article supplement (PMC5446763; doi:10.1186/s12920-017-0274-1), 2017-05-26
Supplement: 12920_2017_274_MOESM7_ESM.pdf [file 12920_2017_274_MOESM7_ESM.pdf]

Table S3: repeat families enriched in mouse cryptic exons

| chr   | start     | end       | geneID                 | exonID | strand | repeat family      | repeat type |
|-------|-----------|-----------|------------------------|--------|--------|--------------------|-------------|
| chr1  | 21229021  | 21229273  | <i>Tmem14a</i>         | E005i1 | +      | antisense B2 SINE  | B3A         |
|       | 24022406  | 24022770  | <i>Fam135a</i>         | E008i1 | -      | antisense B2 SINE  | B2 Mm1t     |
|       | 24022406  | 24022770  | <i>Fam135a</i>         | E008i1 | -      | antisense B2 SINE  | B3          |
|       | 24022406  | 24022770  | <i>Fam135a</i>         | E008i1 | -      | antisense B2 SINE  | B3          |
|       | 193368766 | 193369053 | <i>Camk1g</i>          | E017i2 | -      | simple repeat      | (CA)n       |
|       | 24022406  | 24022770  | <i>Fam135a</i>         | E008i1 | -      | simple repeat      | (CA)n       |
| chr2  | 58049385  | 58049662  | <i>Ernm</i>            | E001i1 | -      | antisense B2 SINE  | B3          |
|       | 24691859  | 24692466  | <i>Cacna1b</i>         | E050i1 | -      | low complexity     | AT rich     |
|       | 58049385  | 58049662  | <i>Ernm</i>            | E001i1 | -      | low complexity     | AT rich     |
|       | 165183138 | 165183472 | <i>Cdh22</i>           | E013i2 | -      | simple repeat      | (TTCA)n     |
|       | 24691859  | 24692466  | <i>Cacna1b</i>         | E050i1 | -      | simple repeat      | (CA)n       |
|       | 24691859  | 24692466  | <i>Cacna1b</i>         | E050i1 | -      | simple repeat      | (TTTA)n     |
| chr3  | 152292456 | 152292758 | <i>Fam73a</i>          | E015i2 | -      | antisense B2 SINE  | B3          |
|       | 152643769 | 152644016 | <i>Ak5</i>             | E014i6 | -      | simple repeat      | (TGGGGG)n   |
| chr5  | 52434150  | 52434525  | <i>Ccdc149</i>         | E009i3 | -      | low complexity     | GA-rich     |
|       | 122556832 | 122557092 | <i>Ift81</i>           | E003i1 | -      | low complexity     | T-rich      |
|       | 122556832 | 122557092 | <i>Ift81</i>           | E003i1 | -      | simple repeat      | (CA)n       |
|       | 52434150  | 52434525  | <i>Ccdc149</i>         | E009i3 | -      | simple repeat      | (TG)n       |
| chr6  | 119369759 | 119370019 | <i>Adipor2</i>         | E010i2 | -      | antisense B2 SINE  | B3          |
|       | 120204163 | 120204566 | <i>B4galnt3</i>        | E002i1 | -      | simple repeat      | (CA)n       |
| chr7  | 34110974  | 34111200  | <i>Wtip</i>            | E001i1 | -      | antisense Alu SINE | B1 Mus1     |
|       | 34110974  | 34111200  | <i>Wtip</i>            | E001i1 | -      | antisense B2 SINE  | B2 Mm2      |
|       | 81490078  | 81490378  | <i>Ap3b2</i>           | E031i2 | -      | simple repeat      | (CAA)n      |
|       | 81490078  | 81490378  | <i>Ap3b2</i>           | E031i2 | -      | simple repeat      | (CA)n       |
| chr9  | 109837772 | 109838325 | <i>Nme6</i>            | E020i1 | +      | antisense B4 SINE  | RSINE1      |
|       | 78207096  | 78207339  | <i>Gsta4</i>           | E005i2 | +      | antisense B2 SINE  | B3          |
|       | 60637548  | 60637770  | <i>Lrrc49</i>          | E017i3 | -      | simple repeat      | (CA)n       |
| chr10 | 45639667  | 45639904  | <i>Hace1</i>           | E013i1 | +      | antisense B2 SINE  | B3          |
|       | 67013987  | 67014265  | <i>Reep3</i>           | E001i1 | -      | antisense ID SINE  | ID4         |
|       | 71263484  | 71263818  | <i>Ube2d1</i>          | E010i1 | -      | antisense B2 SINE  | B2 Mm2      |
|       | 71263484  | 71263818  | <i>Ube2d1</i>          | E010i1 | -      | antisense B2 SINE  | B3A         |
|       | 123150861 | 123151225 | <i>Usp15</i>           | E015i3 | -      | simple repeat      | (CA)n       |
|       | 67013987  | 67014265  | <i>Reep3</i>           | E001i1 | -      | simple repeat      | (CCAA)n     |
|       | 71263484  | 71263818  | <i>Ube2d1</i>          | E010i1 | -      | simple repeat      | (AGGGGG)n   |
|       | 71263484  | 71263818  | <i>Ube2d1</i>          | E010i1 | -      | simple repeat      | (TAAA)n     |
| chr11 | 29421254  | 29421502  | <i>Ccdc88a</i>         | E004i8 | +      | antisense Alu SINE | B1F1        |
|       | 29421254  | 29421502  | <i>Ccdc88a</i>         | E004i8 | +      | antisense Alu SINE | B1 Mus1     |
|       | 76468424  | 76468678  | <i>Abr</i>             | E026i1 | -      | simple repeat      | (CA)n       |
|       | 76468424  | 76468678  | <i>Abr</i>             | E026i1 | -      | simple repeat      | (GGGA)n     |
| chr12 | 55864889  | 55865192  | <i>Brms1l</i>          | E008i1 | +      | antisense B4 SINE  | RSINE1      |
|       | 81509727  | 81510152  | <i>Synj2bp+Gm20498</i> | E036i2 | -      | antisense B2 SINE  | B3A         |
|       | 81509727  | 81510152  | <i>Synj2bp+Gm20498</i> | E036i2 | -      | low complexity     | AT rich     |
|       | 81509727  | 81510152  | <i>Synj2bp+Gm20498</i> | E036i2 | -      | simple repeat      | (CA)n       |
| chr13 | 103862427 | 103862688 | <i>Erb2ip</i>          | E026i1 | -      | antisense B2 SINE  | B3          |
| chr14 | 13957359  | 13957732  | <i>Thoc7</i>           | E007i1 | -      | antisense B2 SINE  | B3A         |
|       | 13957359  | 13957732  | <i>Thoc7</i>           | E007i1 | -      | antisense B4 SINE  | B4A         |
| chr15 | 12833121  | 12833490  | <i>Drosha</i>          | E009i1 | +      | antisense B4 SINE  | B4          |
| chr16 | 45389870  | 45390285  | <i>Cd200</i>           | E003i1 | -      | simple repeat      | (CA)n       |
| chr17 | 34739289  | 34739599  | <i>C4b</i>             | E032i1 | -      | antisense B4 SINE  | B4A         |
|       | 34739289  | 34739599  | <i>C4b</i>             | E032i1 | -      | simple repeat      | (CA)n       |
| chr18 | 6986038   | 6986336   | <i>Mkx</i>             | E007i7 | -      | simple repeat      | (CA)n       |
|       | 80138052  | 80138405  | <i>Adnp2</i>           | E002i1 | -      | simple repeat      | (CA)n       |

Figure S5:  
The nucleotide sequence of B2 SINE in the antisense orientation

AAAGAUUUUAUUUAUUUAUUUAUUUAUUAUGUAAGUACACUGUAGC  
UGUCUUCAGACACUCCAGAAGAGGGAAUCAGAUCUCGUU  
ACGGAUGGUUGUGAGCCACCAUGUGGUUGCUGGGAUUU  
GAACUCCUGACCUUCGGAAGAGCAGUCGGGUGCUCUUA  
CCCACUGAGCCAUCUCACCAGCC

Table S4: repeat families enriched in human cryptic exons

| chr   | start     | end       | geneID                   | exonID | strand | repeat type   | repeat class           |
|-------|-----------|-----------|--------------------------|--------|--------|---------------|------------------------|
| chr1  | 19145498  | 19145779  | <i>UBR4</i>              | E084i1 | -      | simple repeat | (AC) <sub>n</sub>      |
| chr2  | 111799429 | 111799800 | <i>ANAPC1</i>            | E020i1 | -      | simple repeat | (AATCCAA) <sub>n</sub> |
|       | 241668774 | 241669086 | <i>ATG4B</i>             | E047i1 | +      | simple repeat | (GT) <sub>n</sub>      |
|       | 43942575  | 43942904  | <i>LRPPRC</i>            | E024i1 | -      | simple repeat | (ATTTT) <sub>n</sub>   |
| chr3  | 121682816 | 121683064 | <i>GOLGB1</i>            | E013i1 | -      | simple repeat | (T) <sub>n</sub>       |
| chr4  | 102324149 | 102325099 | <i>SLC39A8</i>           | E016i2 | -      | simple repeat | (ATAC) <sub>n</sub>    |
| chr7  | 783125    | 783410    | <i>DNAAF5</i>            | E024i1 | +      | simple repeat | (CGTGAG) <sub>n</sub>  |
| chr10 | 27098079  | 27098427  | <i>ANKRD26</i>           | E045i1 | -      | simple repeat | (TTTAATT) <sub>n</sub> |
|       | 3099456   | 3099920   | <i>PFKP</i>              | E010i1 | +      | simple repeat | (GT) <sub>n</sub>      |
| chr11 | 58616892  | 58617155  | <i>ZFP91+ZFP91-CNTF</i>  | E012i1 | +      | simple repeat | (TG) <sub>n</sub>      |
| chr12 | 116789933 | 116790188 | <i>RNFT2</i>             | E016i2 | +      | simple repeat | (TGGA) <sub>n</sub>    |
|       | 88086609  | 88086890  | <i>CEP290</i>            | E024i1 | -      | simple repeat | (ATCC) <sub>n</sub>    |
| chr14 | 53096016  | 53096319  | <i>DDHD1</i>             | E023i1 | -      | simple repeat | (AGGG) <sub>n</sub>    |
| chr16 | 4367197   | 4367543   | <i>CORO7-PAM16+CORO7</i> | E081i1 | -      | simple repeat | (GAGGG) <sub>n</sub>   |
| chr19 | 4491914   | 4492253   | <i>HDGFRP2</i>           | E015i1 | +      | simple repeat | (GT) <sub>n</sub>      |
| chr21 | 43792282  | 43792675  | <i>RRP1</i>              | E008i1 | +      | simple repeat | (GTGA) <sub>n</sub>    |
